# Supplementary material for: A click-based modular approach to introduction of peroxides onto molecules and nanostructures
Source: Royal Society of Chemistry journal article supplement (doi:10.1039/d0ra09088c), 2020-01-01

## SUPPORTING INFORMATION

A click-based approach to modular introduction of peroxides onto molecules and nanostructures. Horn, A.; Dussault, P. H.

Includes copies of  $^1\text{H}$  and  $^{13}\text{C}$  NMR spectra of molecules reported in the paper, as well as  $^1\text{H}$ , IR, and XPS characterization of functionalized Au nanoparticles (100 pages).

Corresponding author:

Pat Dussault  
Department of Chemistry  
University of Nebraska-Lincoln  
Lincoln, NE 68588-0304  
[pdussault1@unl.edu](mailto:pdussault1@unl.edu)

Contents

|                                                                         |     |
|-------------------------------------------------------------------------|-----|
| 6-( <i>tert</i> -Butylperoxy)-1-hexyne (1)                              | S6  |
| <sup>1</sup> H                                                          | S7  |
| <sup>13</sup> C                                                         |     |
| 8-( <i>tert</i> -Butylperoxy)-1-octyne (2)                              | S8  |
| <sup>1</sup> H                                                          | S9  |
| <sup>13</sup> C                                                         |     |
| 1-Iodo-6- <i>tert</i> -butylperoxy hexyne (3)                           | S10 |
| <sup>1</sup> H                                                          | S11 |
| <sup>13</sup> C                                                         |     |
| 1-Iodo-8- <i>tert</i> -butylperoxy octyne (4)                           | S12 |
| <sup>1</sup> H                                                          | S13 |
| <sup>13</sup> C                                                         |     |
| 3-((2-hydroperoxypropan-2-yl)oxy)-1-propyne (5)                         | S14 |
| <sup>1</sup> H                                                          | S15 |
| <sup>13</sup> C                                                         |     |
| 3-((2-((2-Hydroperoxypropan-2-yl)peroxy)propan-2-yl)oxy)-1-propyne (5a) | S16 |
| <sup>1</sup> H                                                          | S17 |
| <sup>13</sup> C                                                         |     |
| 4-((2-Hydroperoxypropan-2-yl)oxy)-1-butyne (6)                          | S18 |
| <sup>1</sup> H                                                          | S19 |
| <sup>13</sup> C                                                         |     |
| 4-((2-((2-Hydroperoxypropan-2-yl)peroxy)propan-2-yl)oxy)-1-butyne (6a)  | S20 |
| <sup>1</sup> H                                                          | S21 |
| <sup>13</sup> C                                                         |     |
| 6-((2-Hydroperoxypropan-2-yl)oxy)-1-hexyne (7)                          | S22 |
| <sup>1</sup> H                                                          | S23 |
| <sup>13</sup> C                                                         |     |
| 4-((2-Methylperoxypropan-2-yl)oxy)-1-butyne (8)                         | S24 |
| <sup>1</sup> H                                                          | S25 |
| <sup>13</sup> C                                                         |     |
| 6-((2-Methylperoxypropan-2-yl)oxy)-1-hexyne (9)                         | S26 |
| <sup>1</sup> H                                                          | S27 |
| <sup>13</sup> C                                                         |     |
| 1-Iodo-4-((2-methylperoxypropan-2-yl)oxy)-1-butyne (10)                 | S28 |
| <sup>1</sup> H                                                          | S29 |
| <sup>13</sup> C                                                         |     |

Horn and Dussault: A modular approach...

|                                                                                                            |     |
|------------------------------------------------------------------------------------------------------------|-----|
| 1-Iodo-6-((2-methylperoxypropan-2-yl)oxy)-1-hexyne ( <b>11</b> )                                           |     |
| <sup>1</sup> H                                                                                             | S30 |
| <sup>13</sup> C                                                                                            | S31 |
| 1-Azido-(4-( <i>tert</i> -butylperoxy) butane ( <b>12</b> ))                                               |     |
| <sup>1</sup> H                                                                                             | S32 |
| <sup>13</sup> C                                                                                            | S33 |
| (6-Azidohexan-2-yl)peroxytriethylsilane ( <b>13</b> )                                                      |     |
| <sup>1</sup> H                                                                                             | S34 |
| <sup>13</sup> C                                                                                            | S35 |
| Hex-5-yn-1-yl benzene ( <b>15</b> )                                                                        |     |
| <sup>1</sup> H                                                                                             | S36 |
| <sup>13</sup> C                                                                                            | S37 |
| 3-Azidopropylbenzene ( <b>16</b> )                                                                         |     |
| <sup>1</sup> H                                                                                             | S38 |
| <sup>13</sup> C                                                                                            | S39 |
| 4-Azidobutylbenzene ( <b>17</b> )                                                                          |     |
| <sup>1</sup> H                                                                                             | S40 |
| <sup>13</sup> C                                                                                            | S41 |
| 6-Azidohexane-1-thiol ( <b>18</b> )                                                                        |     |
| <sup>1</sup> H                                                                                             | S42 |
| <sup>13</sup> C                                                                                            | S43 |
| 4-(4-( <i>tert</i> -Butylperoxy)butyl)-1-(3-phenylpropyl)-1 <i>H</i> -1,2,3-triazole ( <b>19</b> )         |     |
| <sup>1</sup> H                                                                                             | S44 |
| <sup>13</sup> C                                                                                            | S45 |
| 4-(4-( <i>tert</i> -Butylperoxy)butyl)-5-iodo-1-(3-phenylpropyl)-1 <i>H</i> -1,2,3-triazole ( <b>19i</b> ) |     |
| <sup>1</sup> H                                                                                             | S46 |
| <sup>13</sup> C                                                                                            | S47 |
| 4-(4-( <i>tert</i> -Butylperoxy)butyl)-1-(4-phenylbutyl)-1 <i>H</i> -1,2,3-triazole ( <b>20</b> )          |     |
| <sup>1</sup> H                                                                                             | S48 |
| <sup>13</sup> C                                                                                            | S49 |
| 4-(4-( <i>tert</i> -Butylperoxy)butyl)-5-iodo-1-(4-phenylbutyl)-1 <i>H</i> -1,2,3-triazole ( <b>20i</b> )  |     |
| <sup>1</sup> H                                                                                             | S50 |
| <sup>13</sup> C                                                                                            | S51 |
| 4-(1-(4-Phenylbutyl)-)-1 <i>H</i> -1,2,3-triazol-4-yl)butanal ( <b>21</b> )                                |     |
| <sup>1</sup> H                                                                                             | S52 |
| <sup>13</sup> C                                                                                            | S53 |
| 4-(6-( <i>tert</i> -Butylperoxy)hexyl)-1-(3-phenylpropyl)-1 <i>H</i> -1,2,3-triazole ( <b>22</b> )         |     |
| <sup>1</sup> H                                                                                             | S54 |
| <sup>13</sup> C                                                                                            | S55 |

|                                                                                                                   |     |
|-------------------------------------------------------------------------------------------------------------------|-----|
| 4-(6-( <i>tert</i> -Butylperoxy)hexyl)-5-iodo-1-(3-phenylpropyl)-1 <i>H</i> -1,2,3-triazole ( <b>22i</b> )        | S56 |
| <sup>1</sup> H                                                                                                    | S57 |
| <sup>13</sup> C                                                                                                   |     |
| 4-(6-( <i>tert</i> -Butylperoxy)hexyl)-1-(4-phenylbutyl)-1 <i>H</i> -1,2,3-triazole ( <b>23</b> )                 | S58 |
| <sup>1</sup> H                                                                                                    | S59 |
| <sup>13</sup> C                                                                                                   |     |
| 4-(6-( <i>tert</i> -butylperoxy)hexyl)-5-iodo-1-(4-phenylbutyl)-1 <i>H</i> -1,2,3-triazole ( <b>23i</b> )         | S60 |
| <sup>1</sup> H                                                                                                    | S61 |
| <sup>13</sup> C                                                                                                   |     |
| 6-(1-(3-Phenylpropyl)-1 <i>H</i> -1,2,3-triazol-4-yl)hexanal ( <b>24</b> )                                        | S62 |
| <sup>1</sup> H                                                                                                    | S63 |
| <sup>13</sup> C                                                                                                   |     |
| 6-(1-(4-phenylbutyl)-1 <i>H</i> -1,2,3-triazol-4-yl)hexanal ( <b>25</b> )                                         | S64 |
| <sup>1</sup> H                                                                                                    | S65 |
| <sup>13</sup> C                                                                                                   |     |
| 4-(4-((2-(Methylperoxy)propan-2-yl)oxy)butyl)-1-(3-phenylpropyl)-1 <i>H</i> -1,2,3-triazole ( <b>26</b> )s        | S66 |
| <sup>1</sup> H                                                                                                    | S67 |
| <sup>13</sup> C                                                                                                   |     |
| 5-Iodo-4-(4-((2-(methylperoxy)propan-2-yl)oxy)butyl)-1-(3-phenylpropyl)-1 <i>H</i> -1,2,3-triazole ( <b>27i</b> ) | S68 |
| <sup>1</sup> H                                                                                                    | S69 |
| <sup>13</sup> C                                                                                                   |     |
| 4-Butyl-1-(4-( <i>tert</i> -butylperoxy)butyl)-1 <i>H</i> -1,2,3-triazole ( <b>28</b> )                           | S70 |
| <sup>1</sup> H                                                                                                    | S71 |
| <sup>13</sup> C                                                                                                   |     |
| 4-(4-( <i>tert</i> -Butylperoxy)butyl)-1-(4-phenylbutyl)-1 <i>H</i> -1,2,3-triazole ( <b>29</b> )                 | S72 |
| <sup>1</sup> H                                                                                                    | S73 |
| <sup>13</sup> C                                                                                                   |     |
| Pentanethiolate Functionalized Gold Nanoparticles                                                                 |     |
| <sup>1</sup> H ( <b>SI-Figure 1</b> )                                                                             | S76 |
| XPS Au ( <b>SI-Figure 2</b> )                                                                                     | S77 |
| XPS S ( <b>SI-Figure 3</b> )                                                                                      | S78 |
| XPS C ( <b>SI-Figure 4</b> )                                                                                      | S79 |
| Dodecanethiolate Functionalized Gold Nanoparticles                                                                |     |
| <sup>1</sup> H ( <b>SI-Figure 5</b> )                                                                             | S80 |

|                                                |      |
|------------------------------------------------|------|
| XPS Au ( <b>SI-Figure 6</b> )                  | S81  |
| XPS S ( <b>SI-Figure 7</b> )                   | S82  |
| XPS C ( <b>SI-Figure 8</b> )                   | S83  |
| Azide Functionalized Gold Nanoparticles        |      |
| <sup>1</sup> H ( <b>SI-Figure 9</b> )          | S84  |
| XPS Au ( <b>SI-Figure 10</b> )                 | S85  |
| XPS S ( <b>SI-Figure 11</b> )                  | S86  |
| XPS C ( <b>SI-Figure 12</b> )                  | S87  |
| XPS N ( <b>SI-Figure 13</b> )                  | S88  |
| Peroxide Functionalized Gold Nanoparticles     |      |
| <sup>1</sup> H ( <b>SI-Figure 14</b> )         | S89  |
| XPS Au ( <b>SI-Figure 15</b> )                 | S90  |
| XPS S ( <b>SI-Figure 16</b> )                  | S91  |
| XPS C ( <b>SI-Figure 17</b> )                  | S92  |
| XPS N ( <b>SI-Figure 18</b> )                  | S93  |
| XPS O ( <b>SI-Figure 19</b> )                  | S94  |
| Peroxyacetal Functionalized Gold Nanoparticles |      |
| <sup>1</sup> H ( <b>SI-Figure 20</b> )         | S95  |
| XPS Au ( <b>SI-Figure 21</b> )                 | S96  |
| XPS S ( <b>SI-Figure 22</b> )                  | S97  |
| XPS C ( <b>SI-Figure 23</b> )                  | S98  |
| XPS N ( <b>SI-Figure 24</b> )                  | S99  |
| XPS O ( <b>SI-Figure 25</b> )                  | S100 |

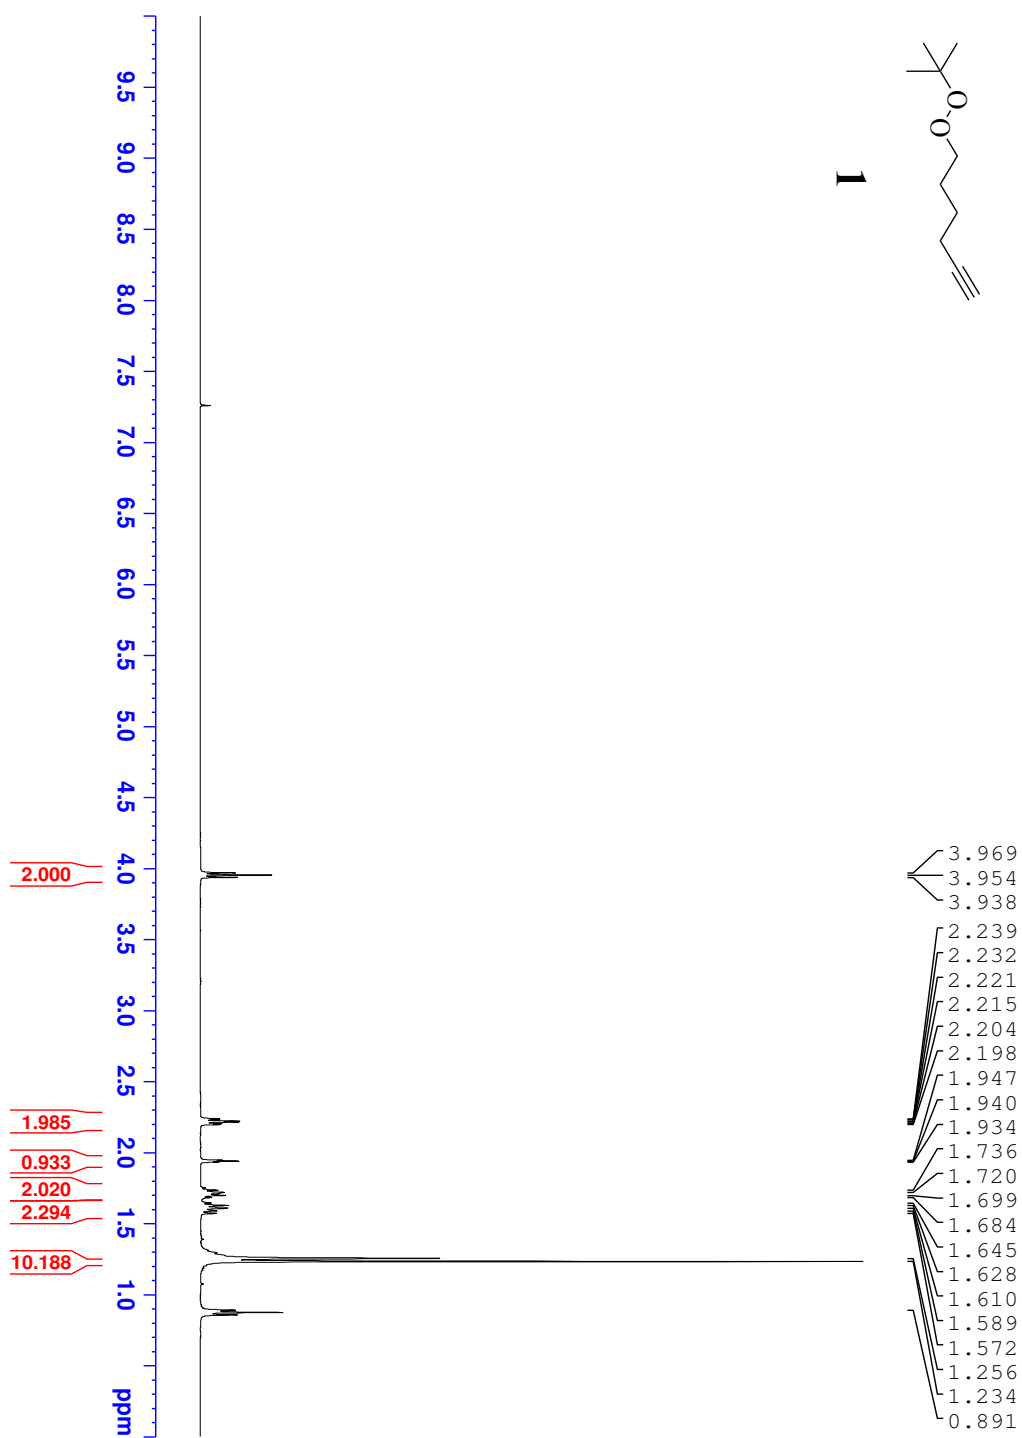

Horn and Dussault: A modular approach...

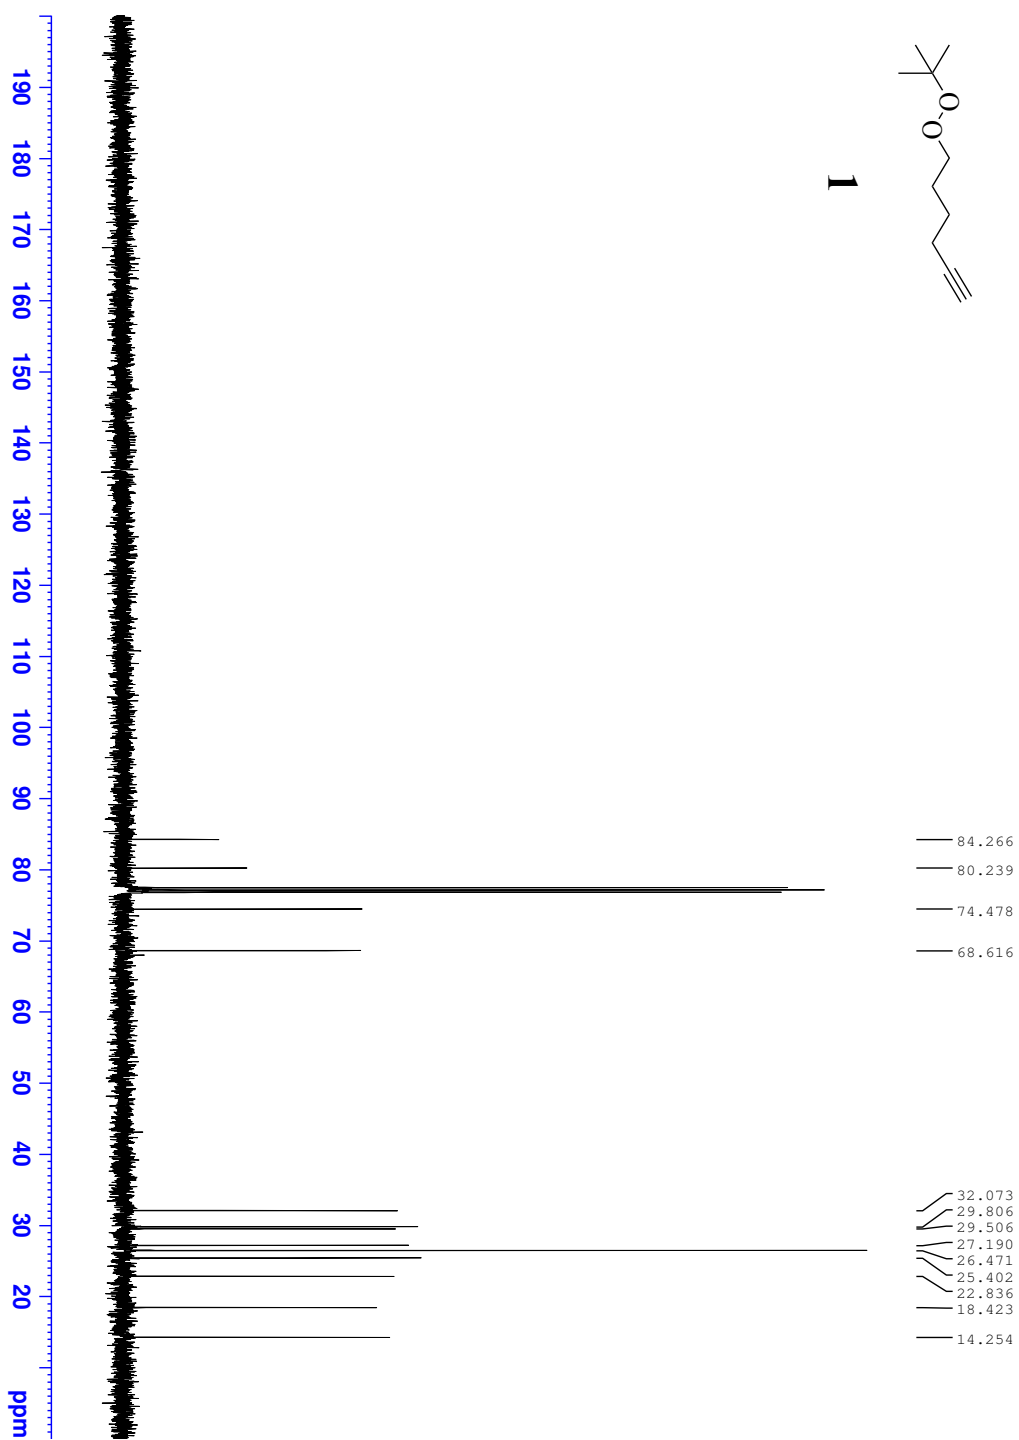

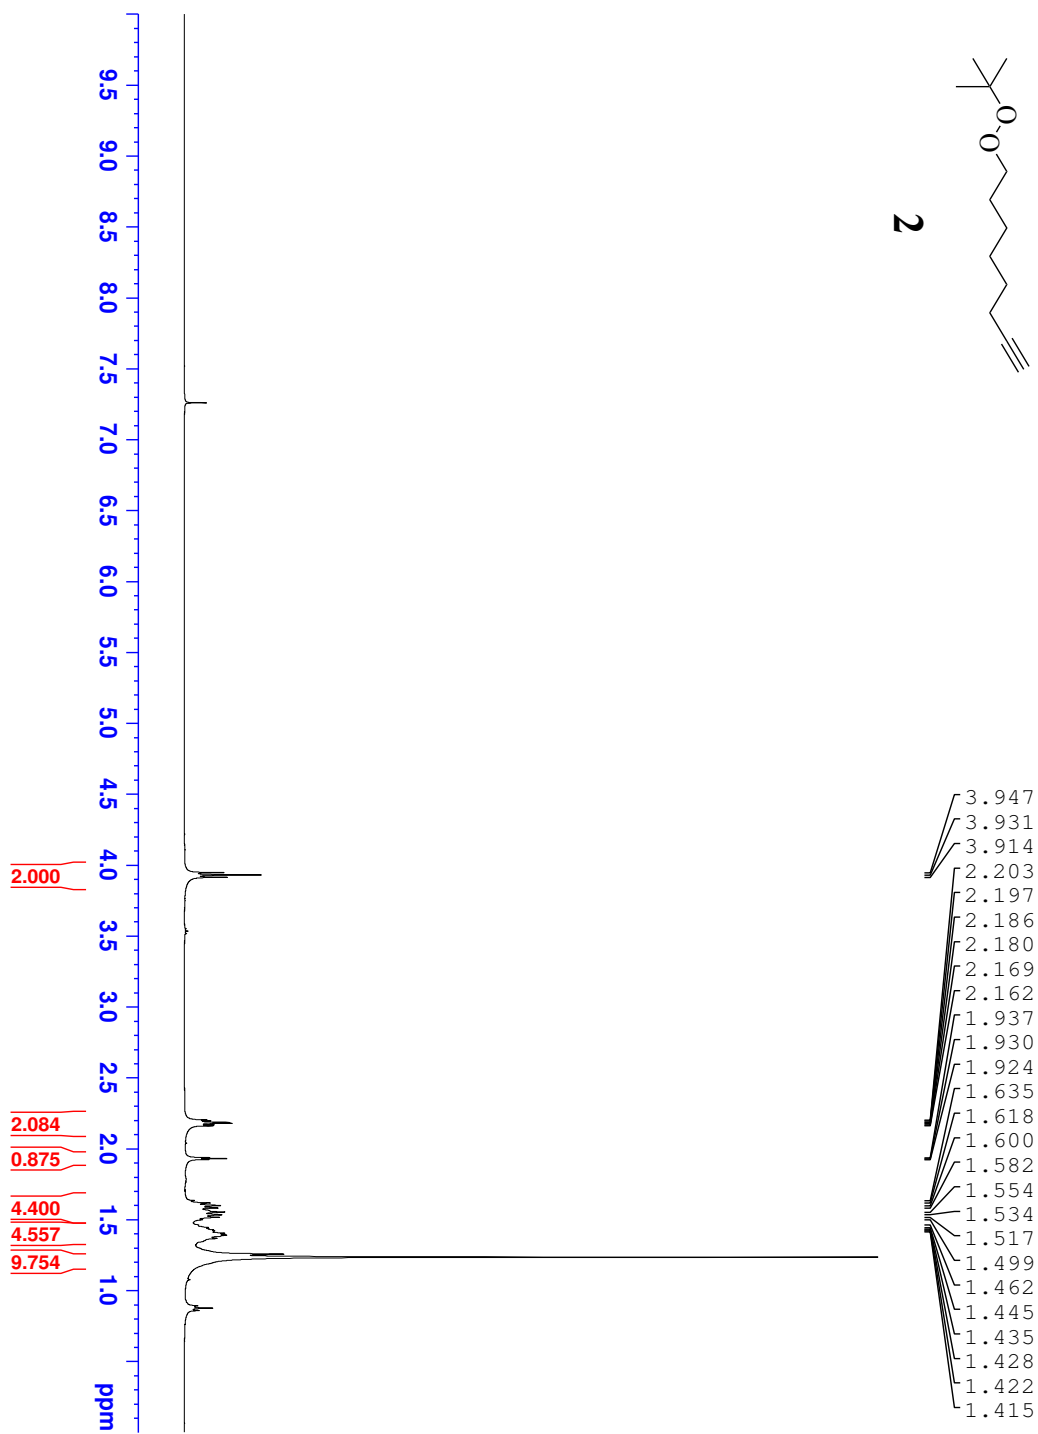



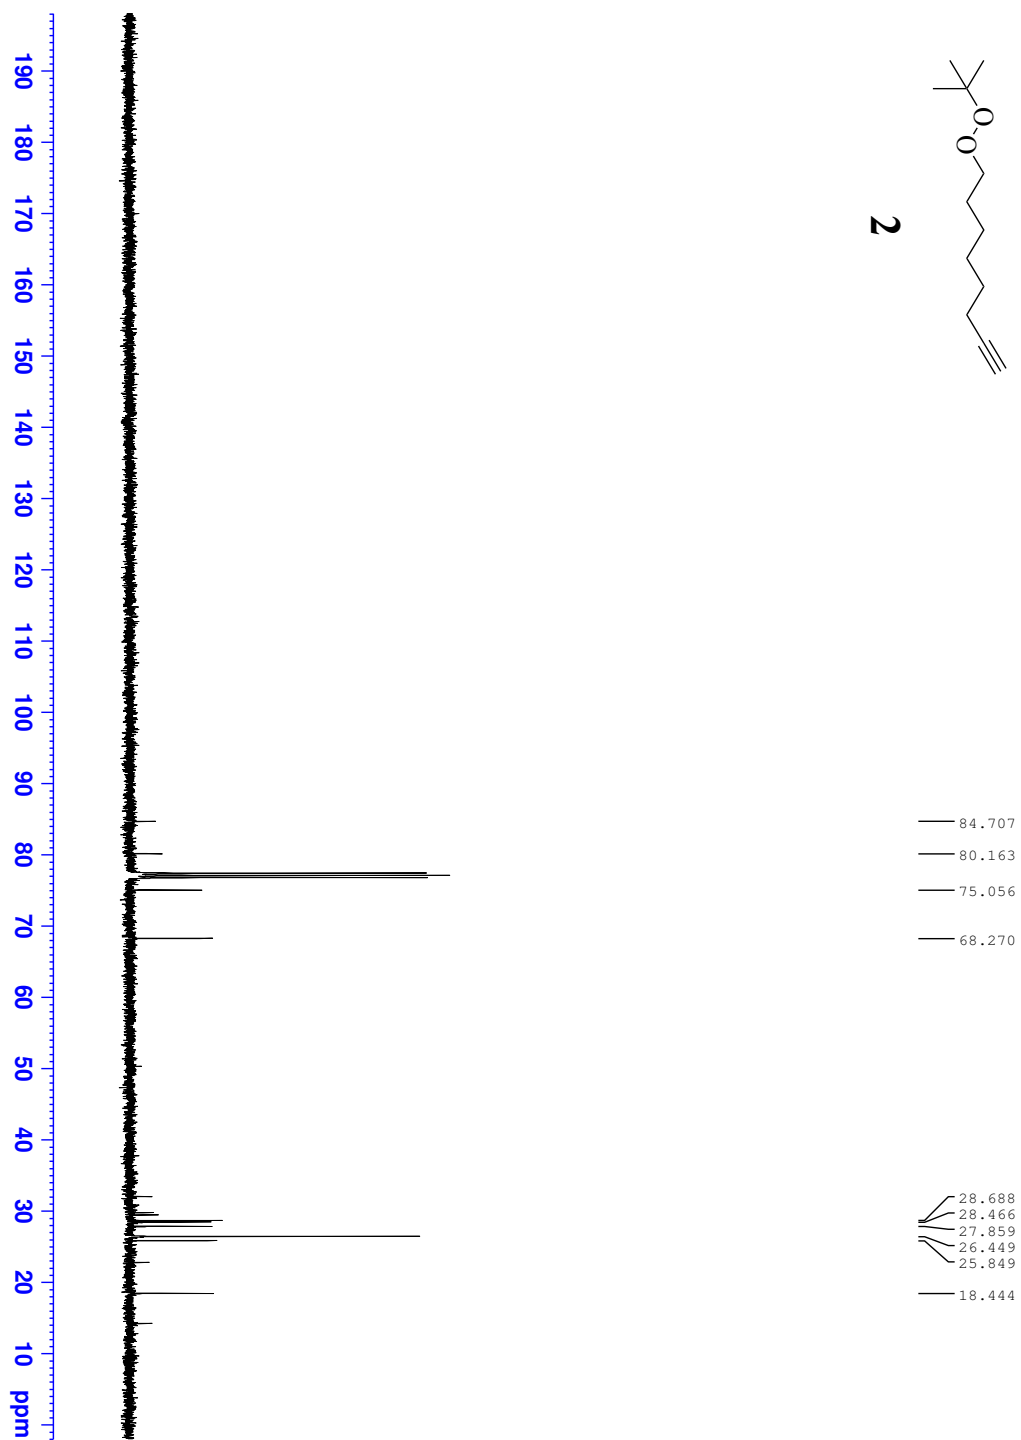

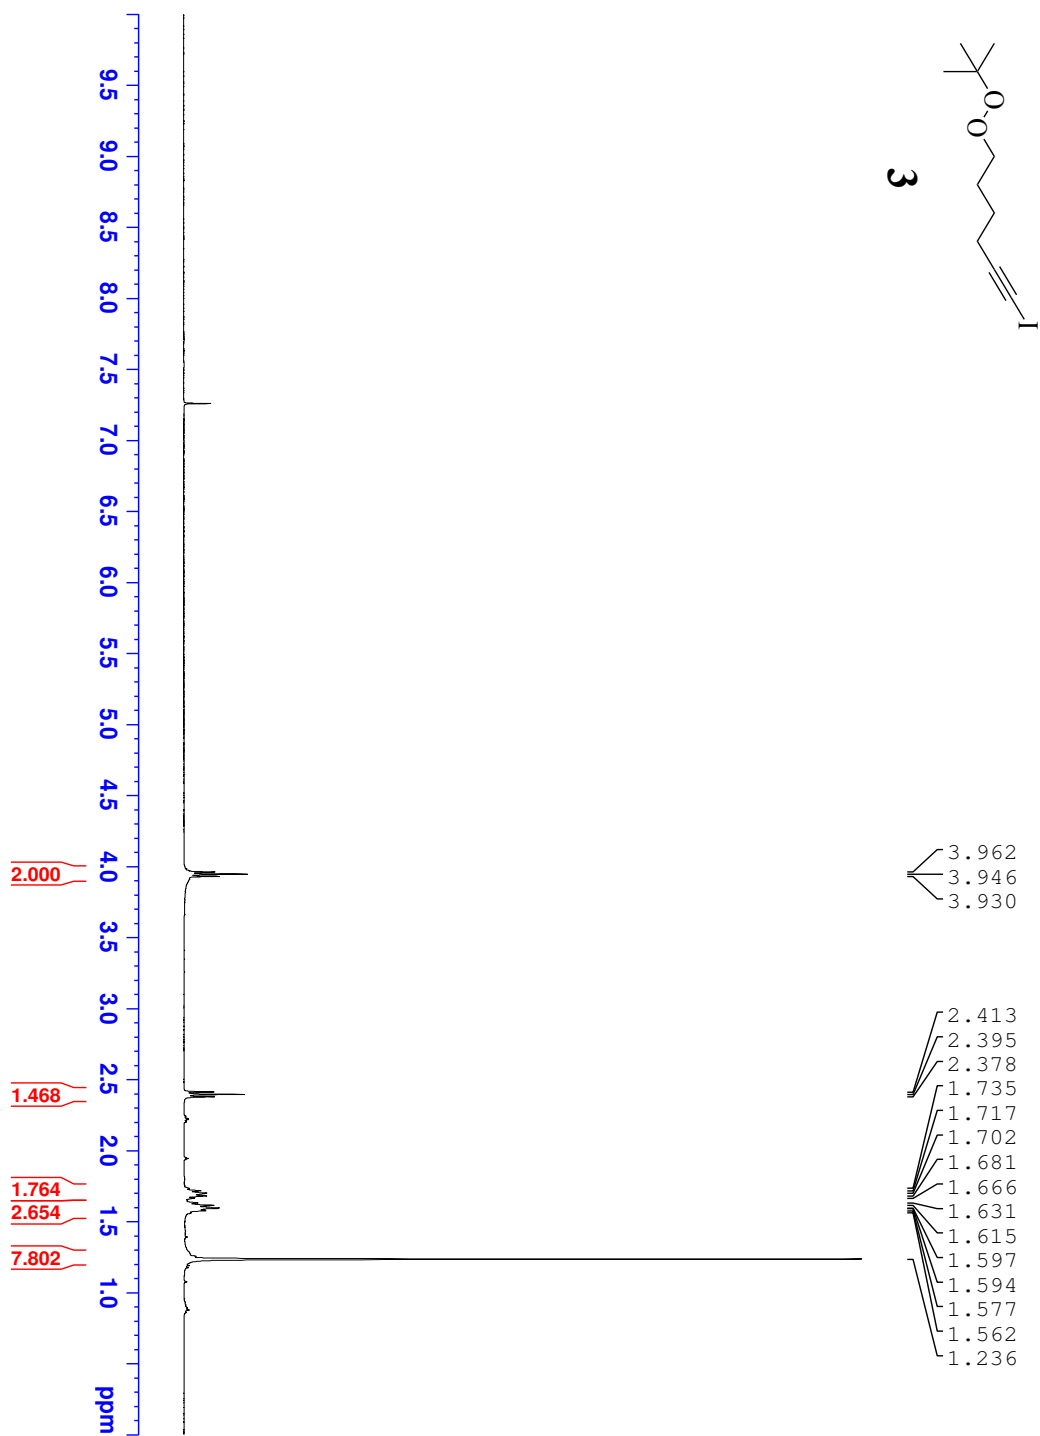

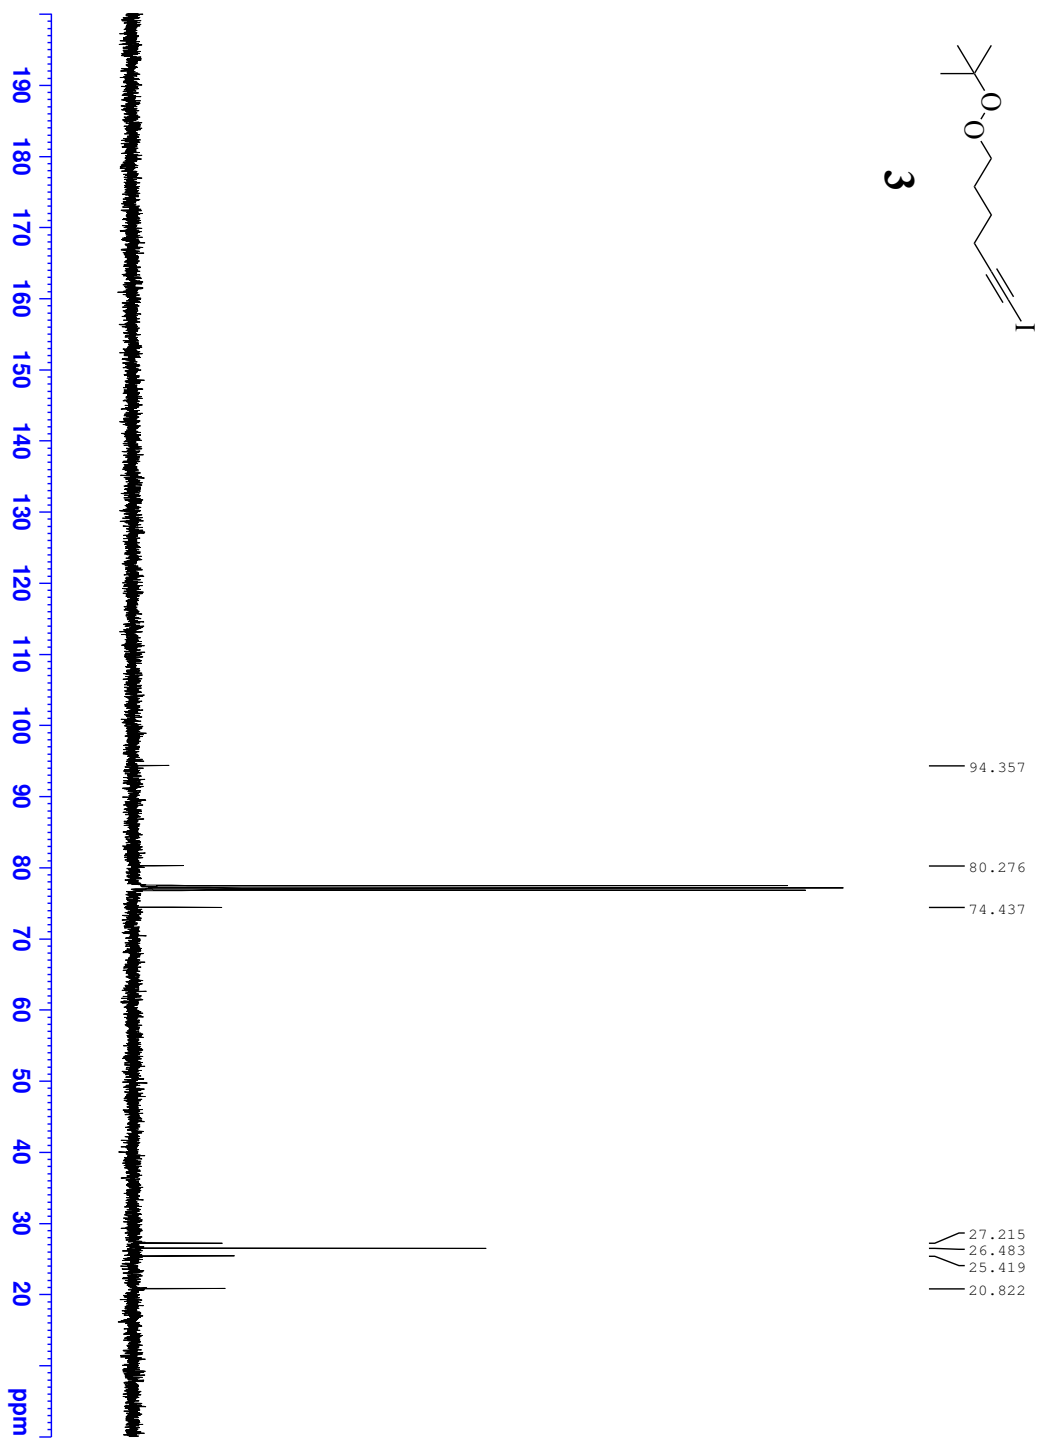

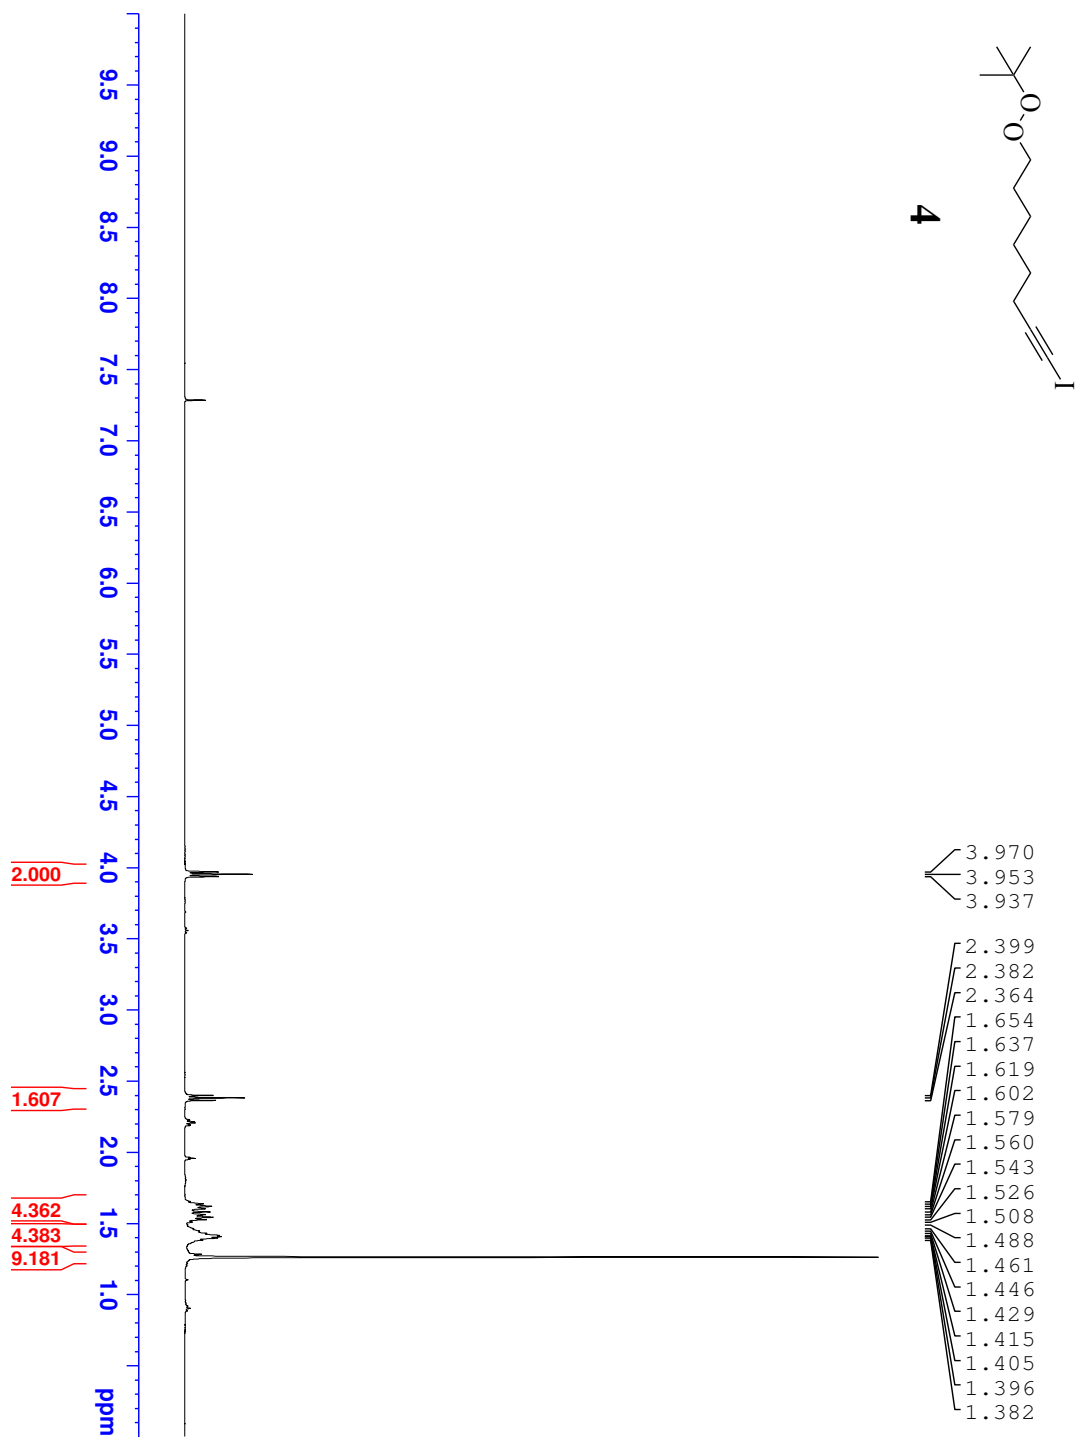

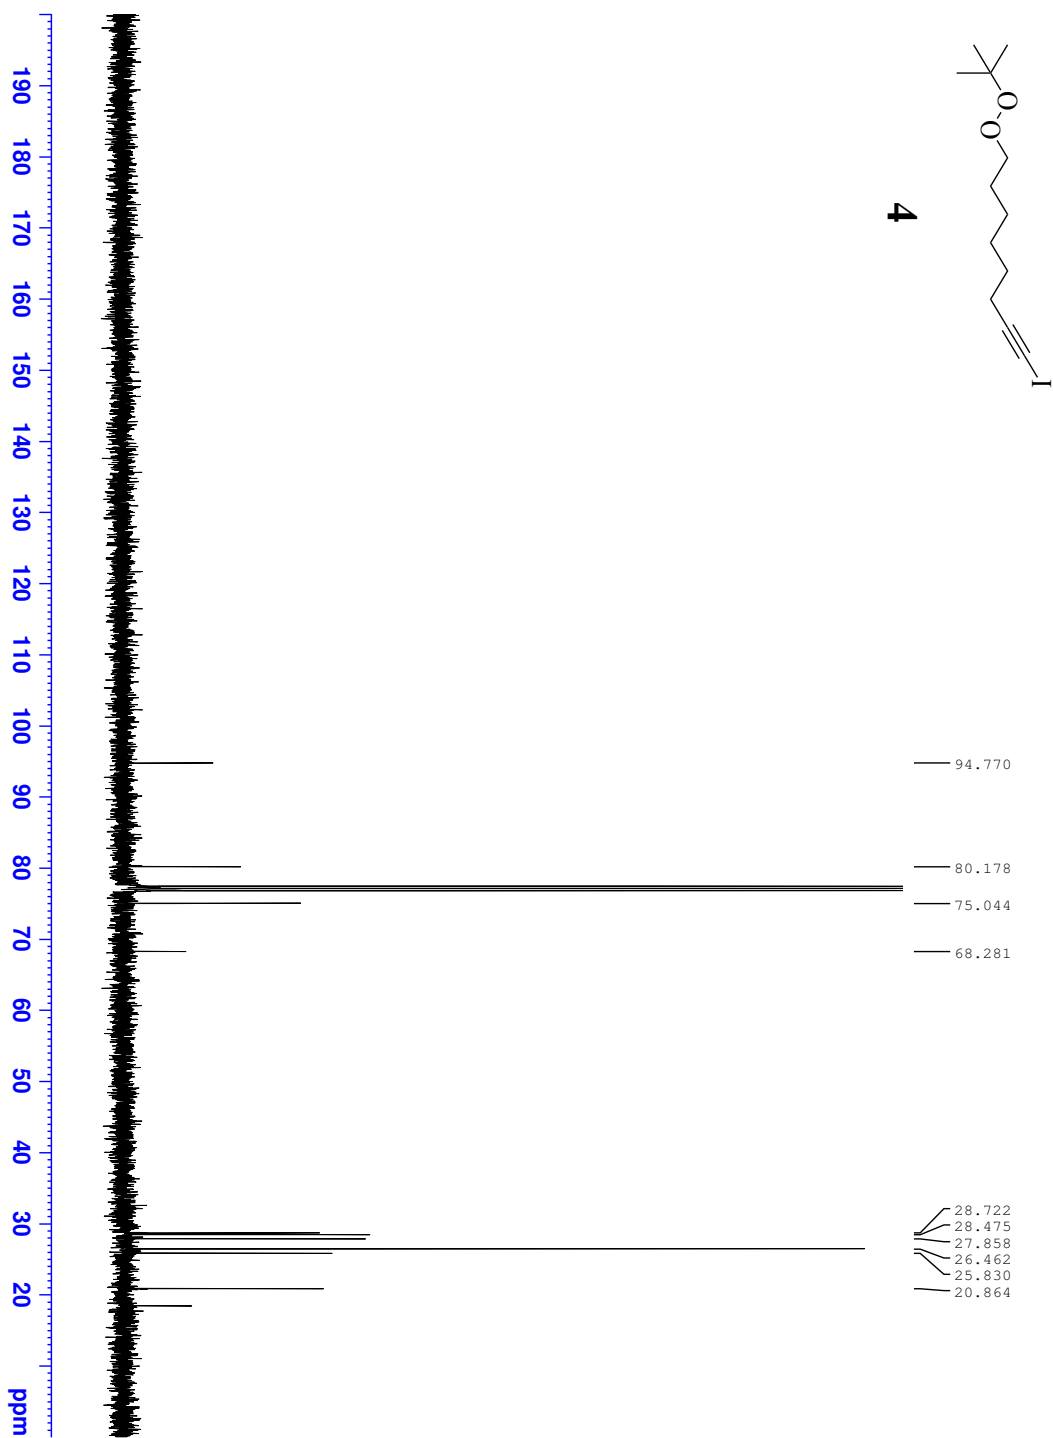

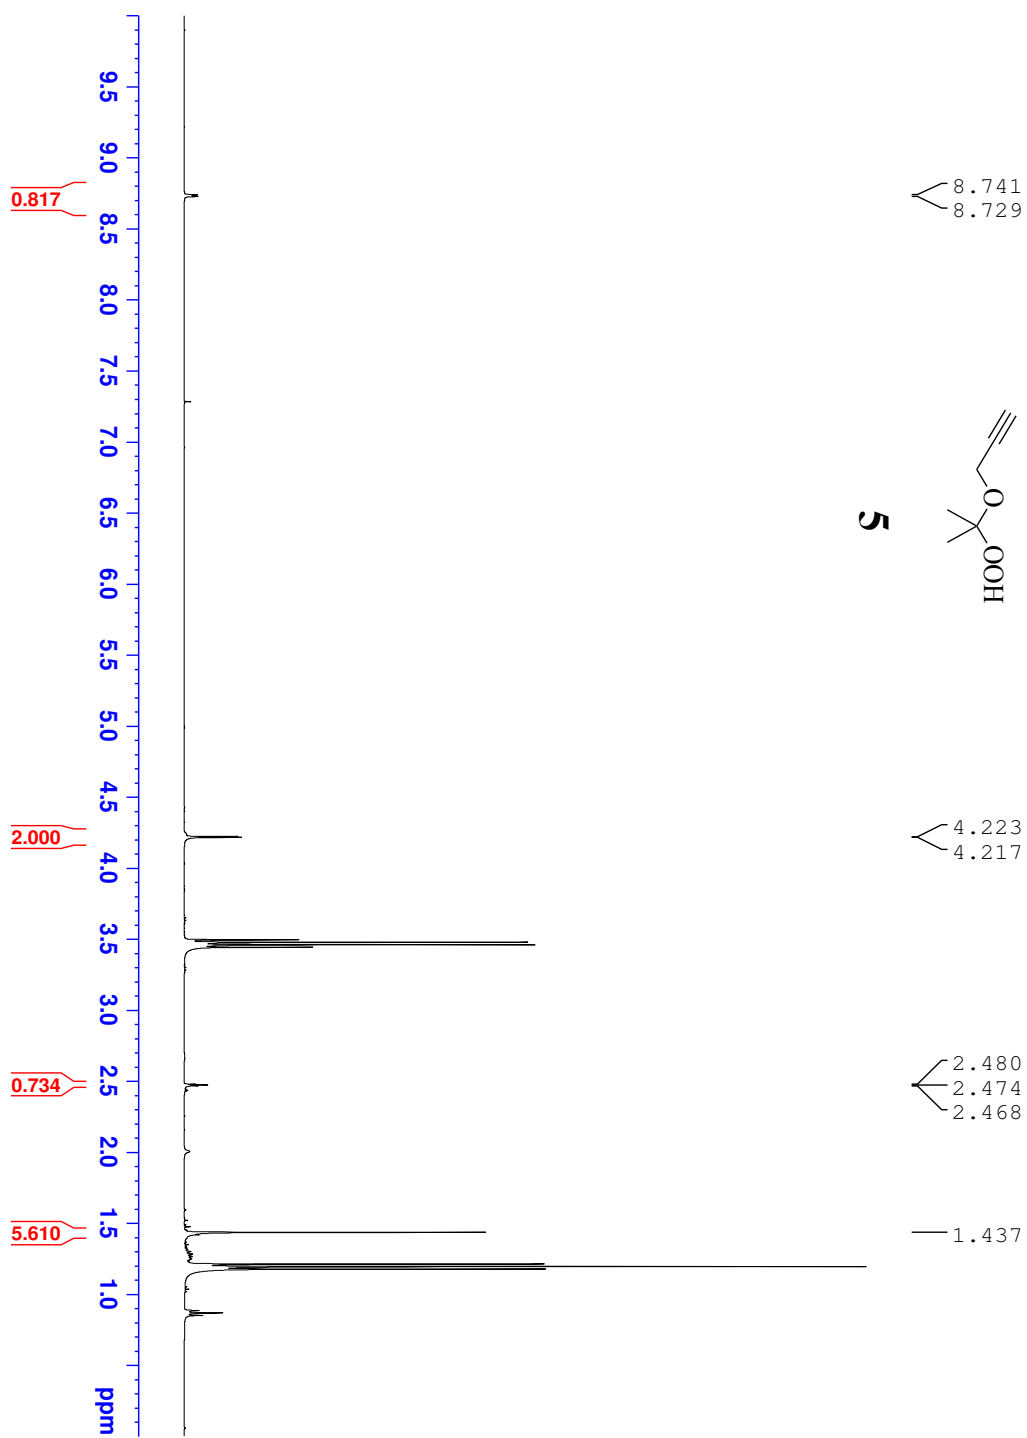

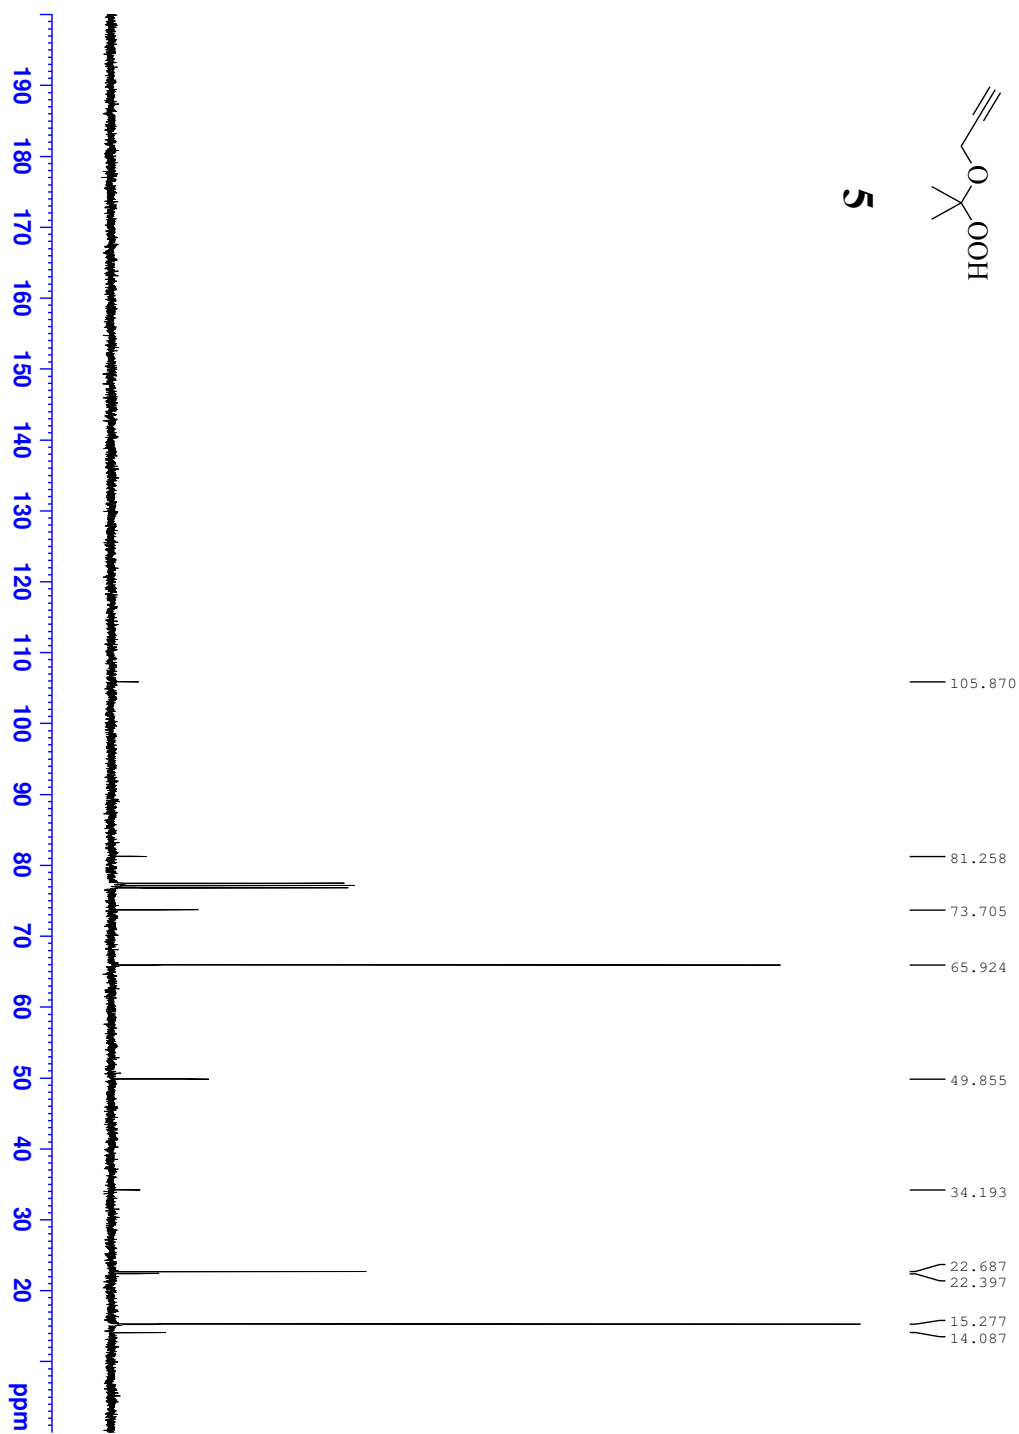

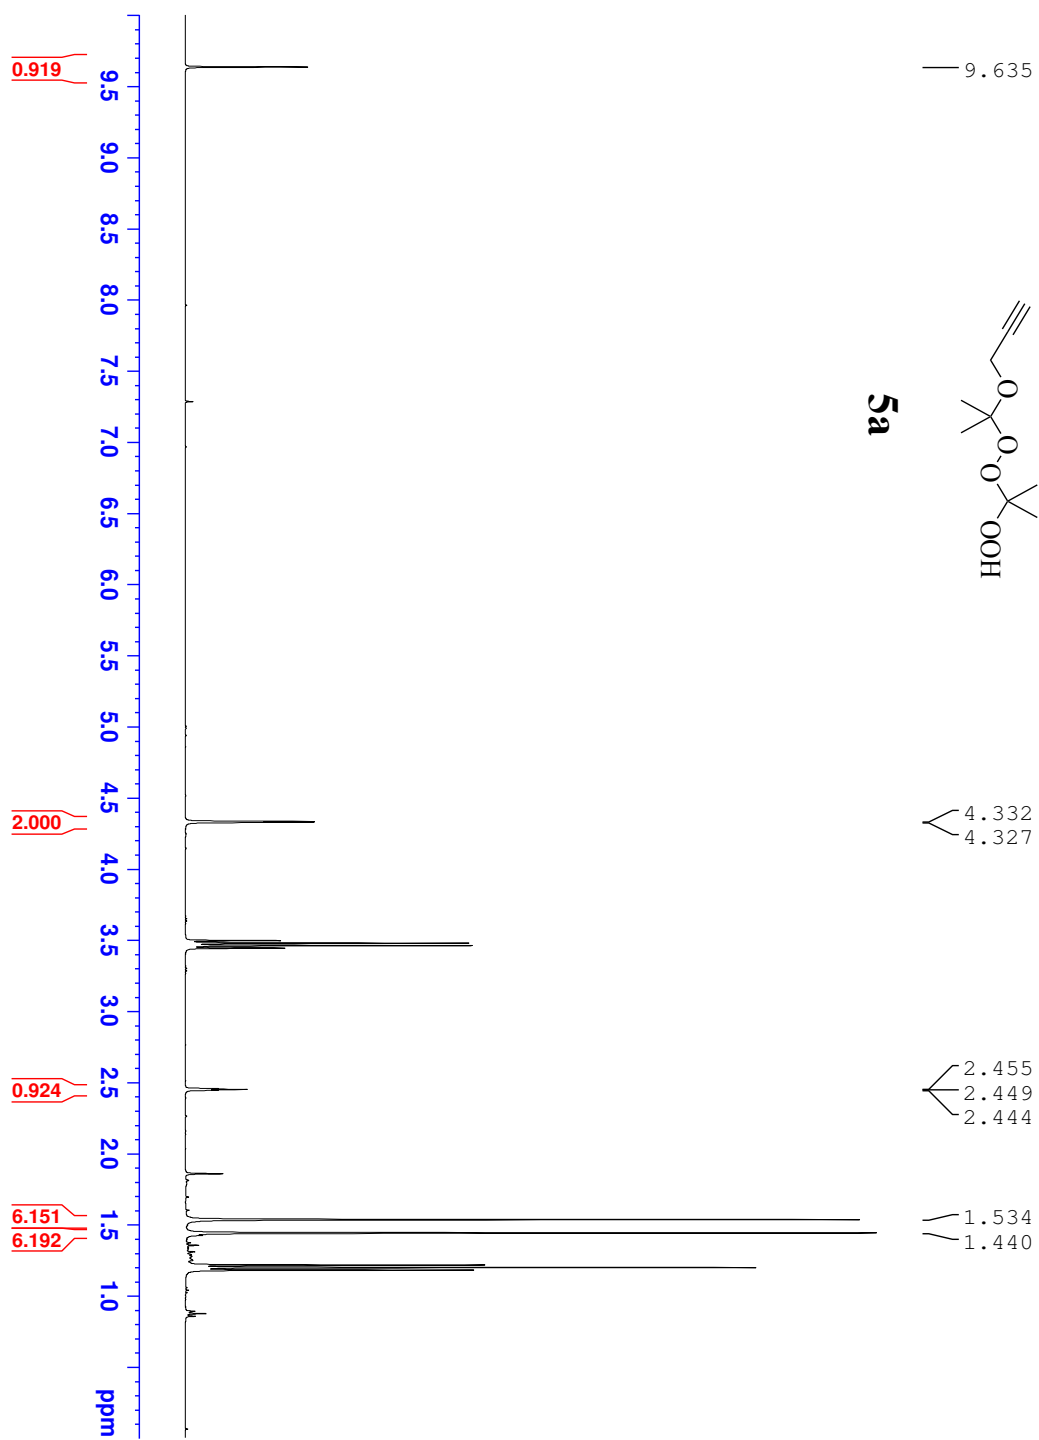



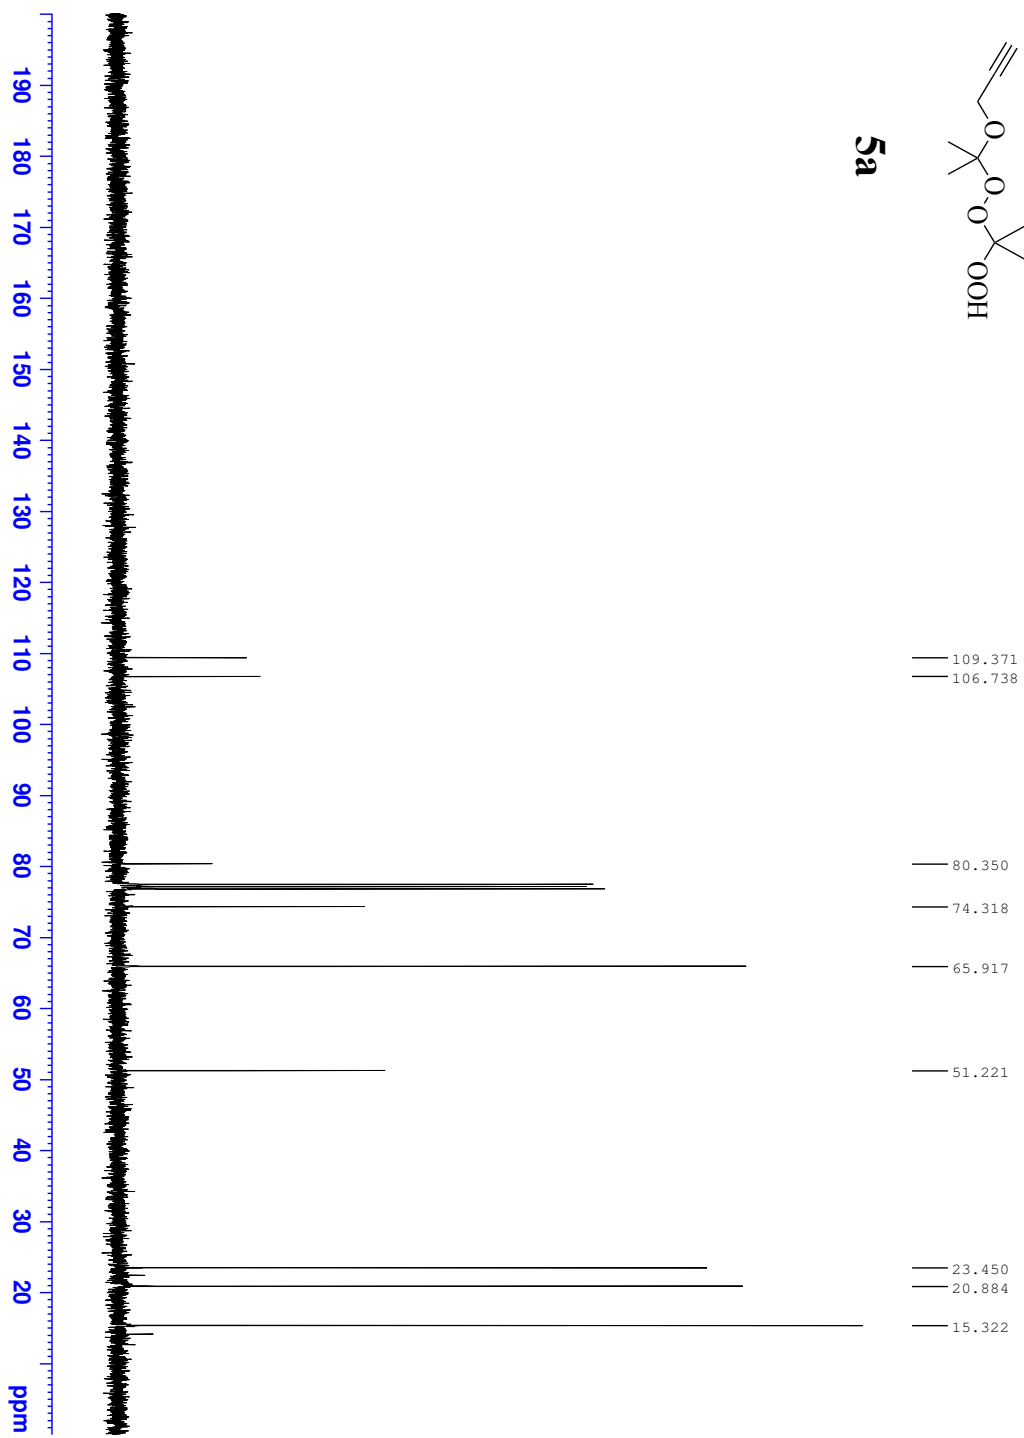

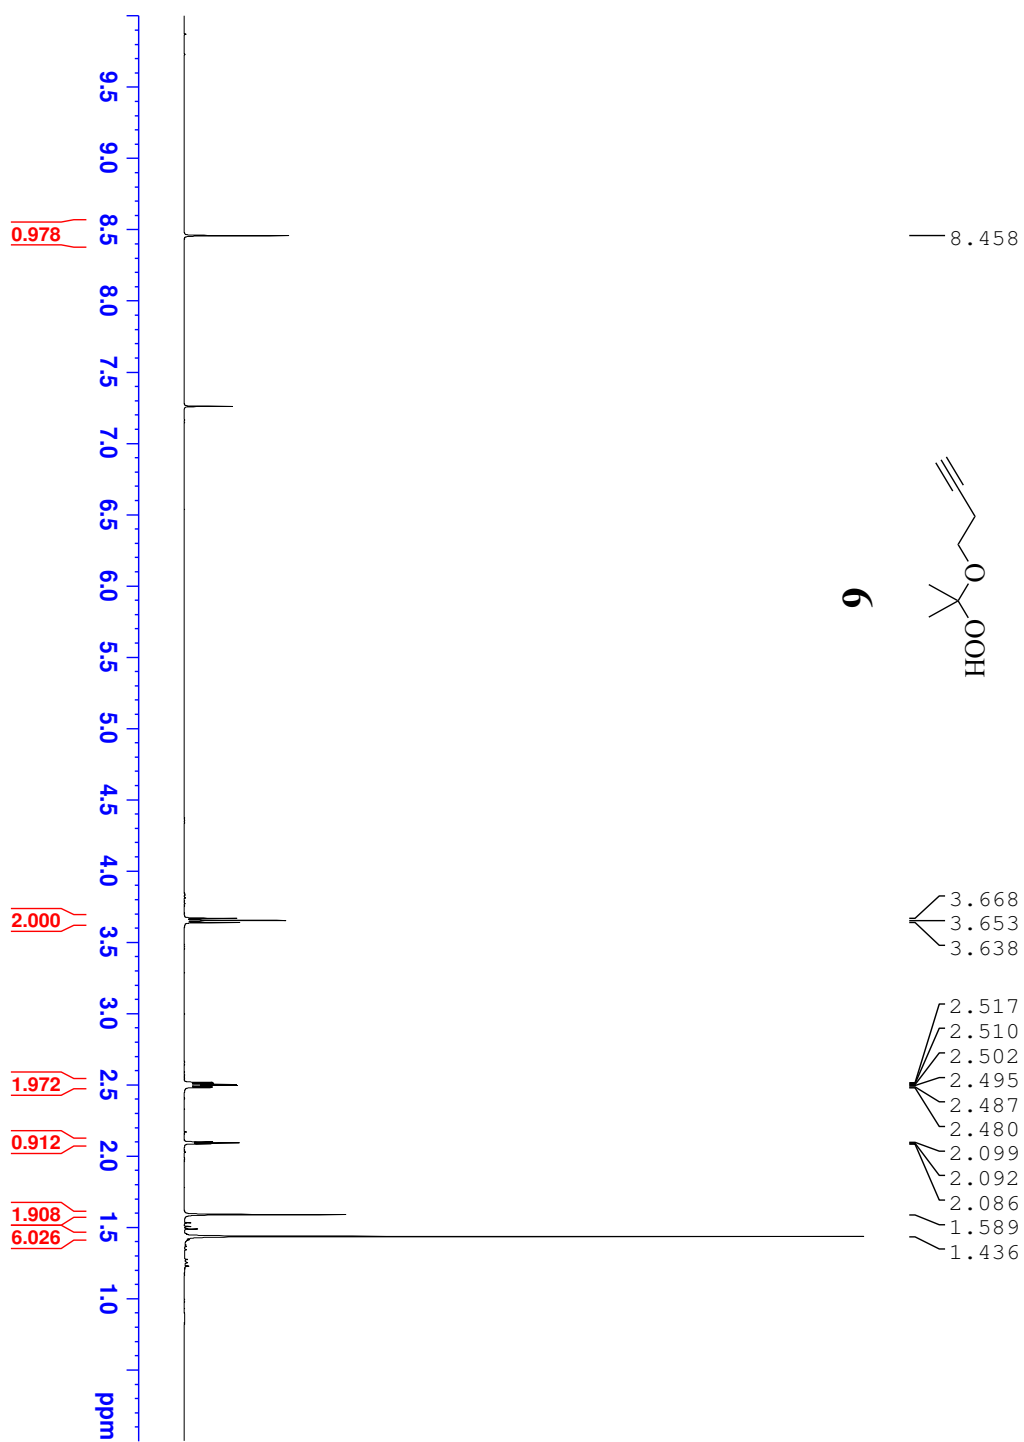

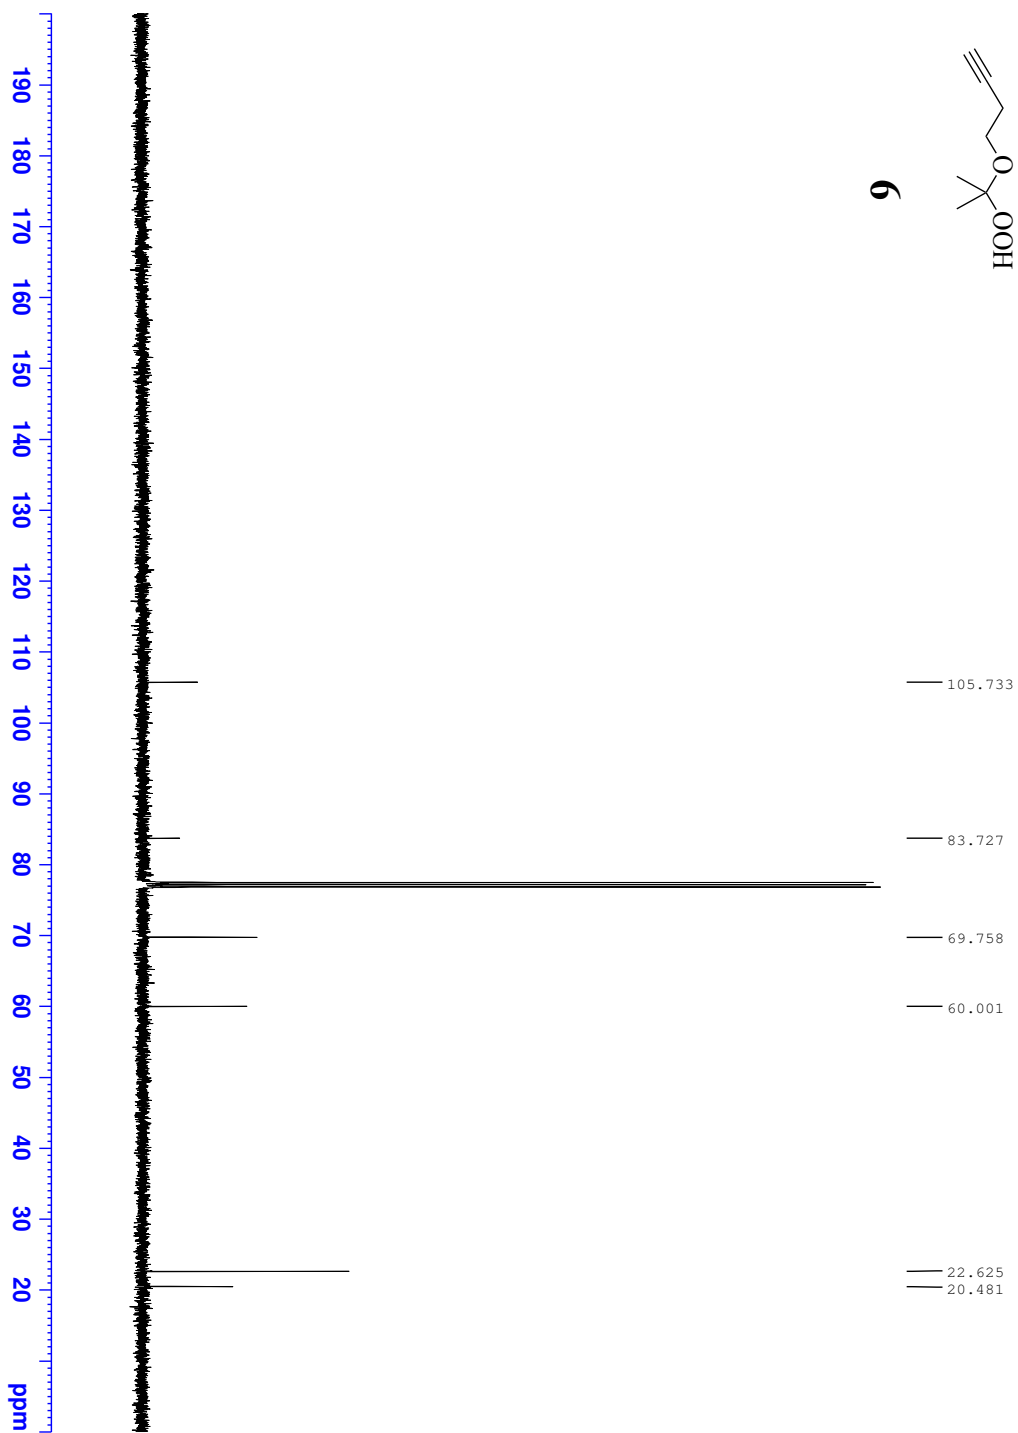

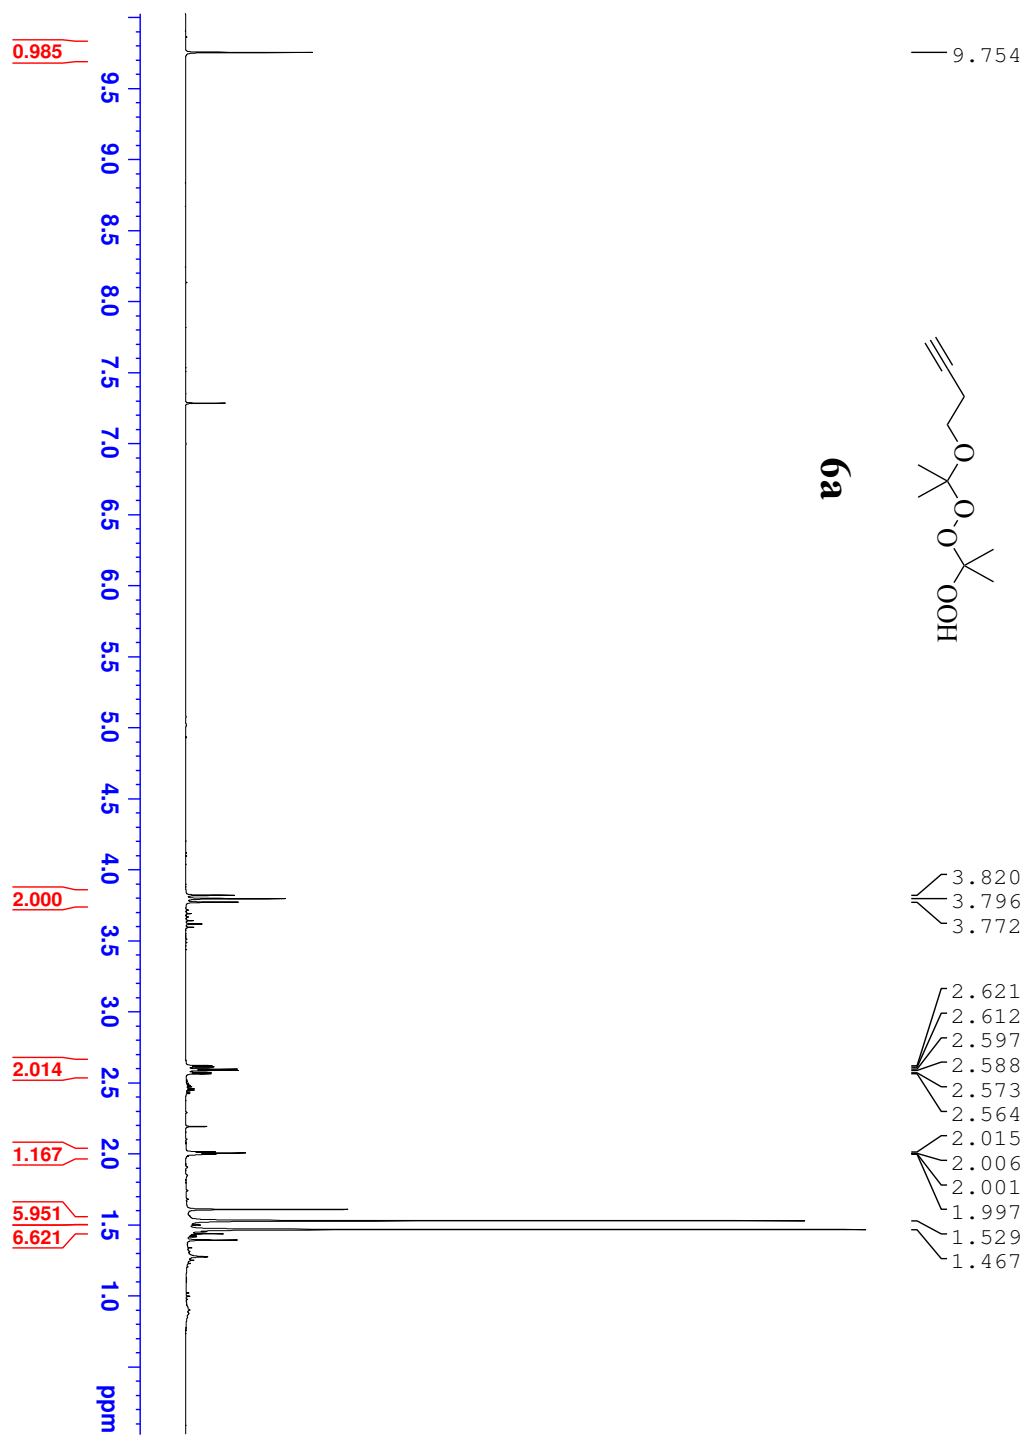

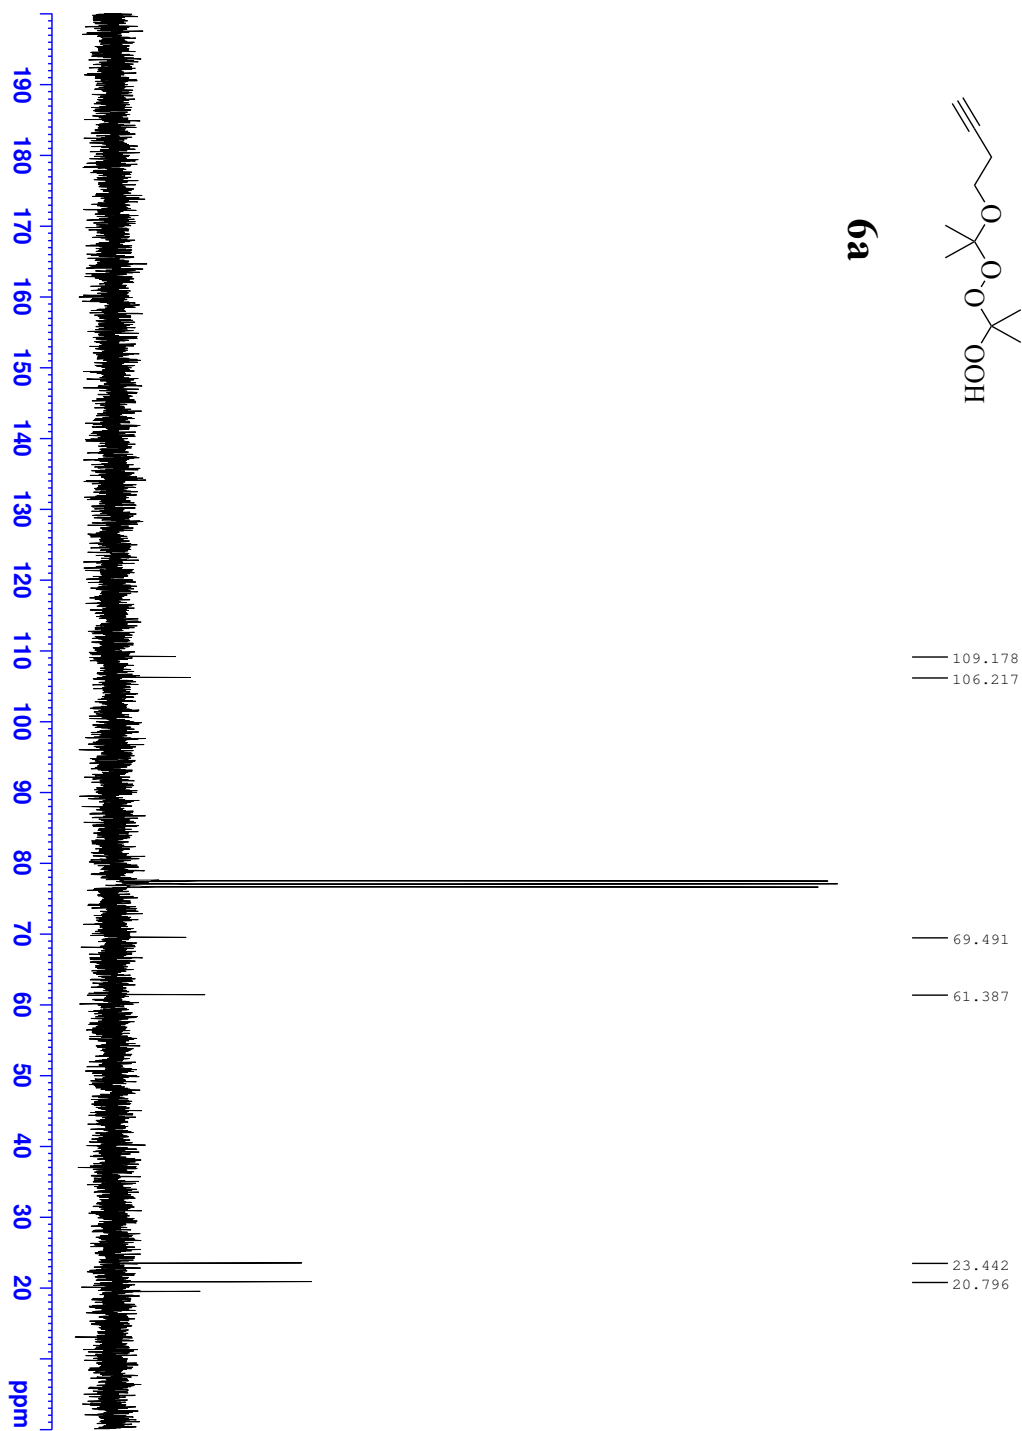

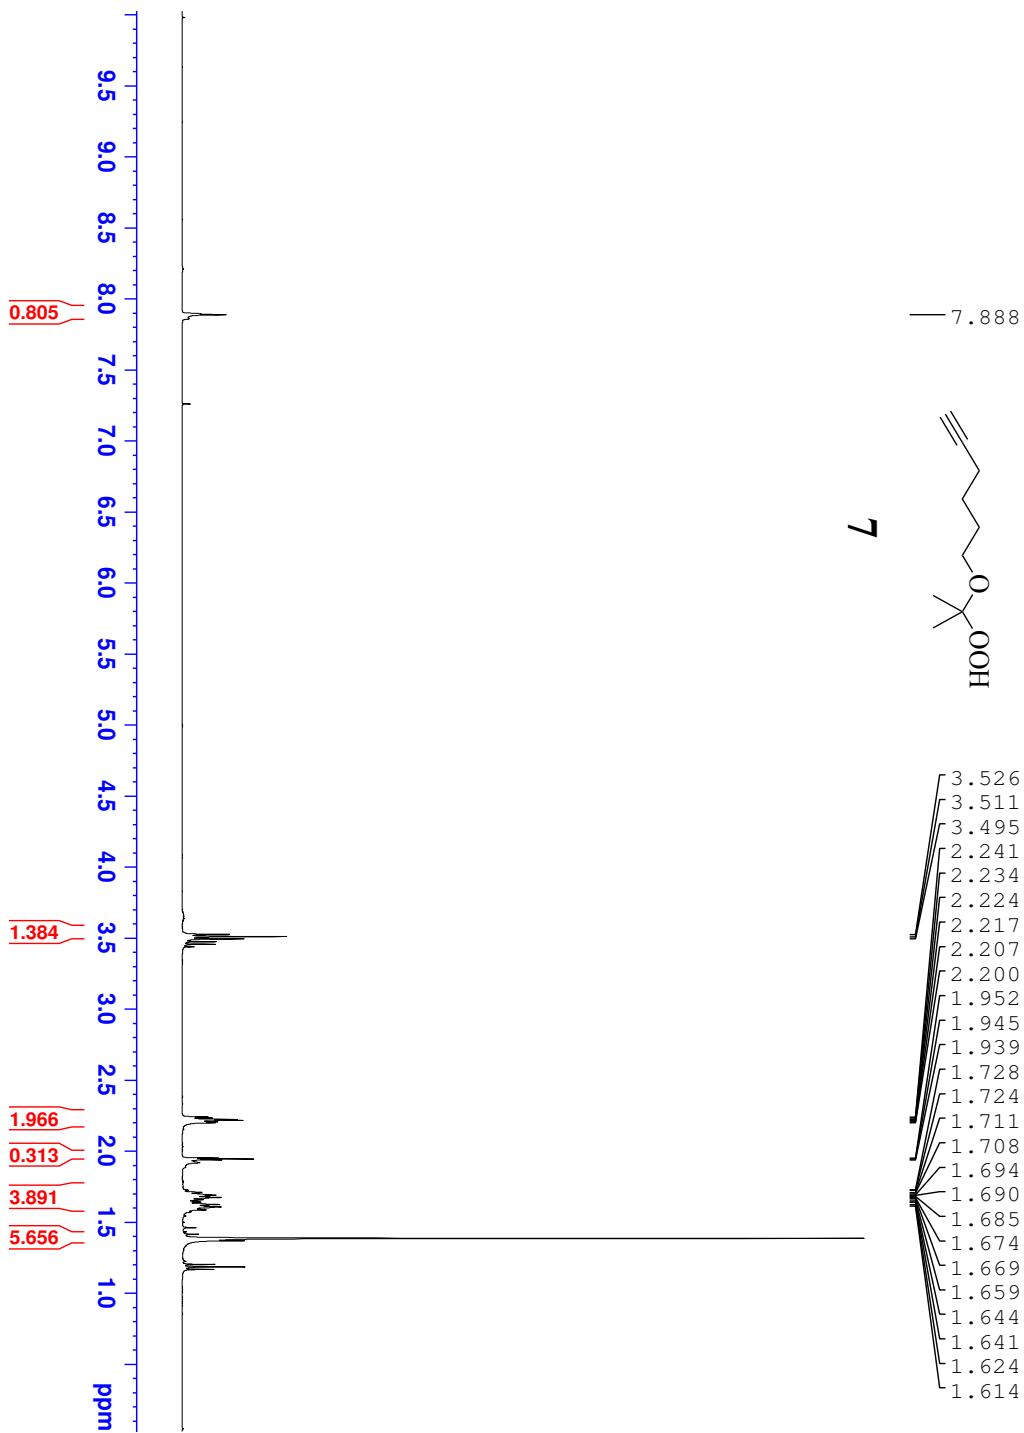

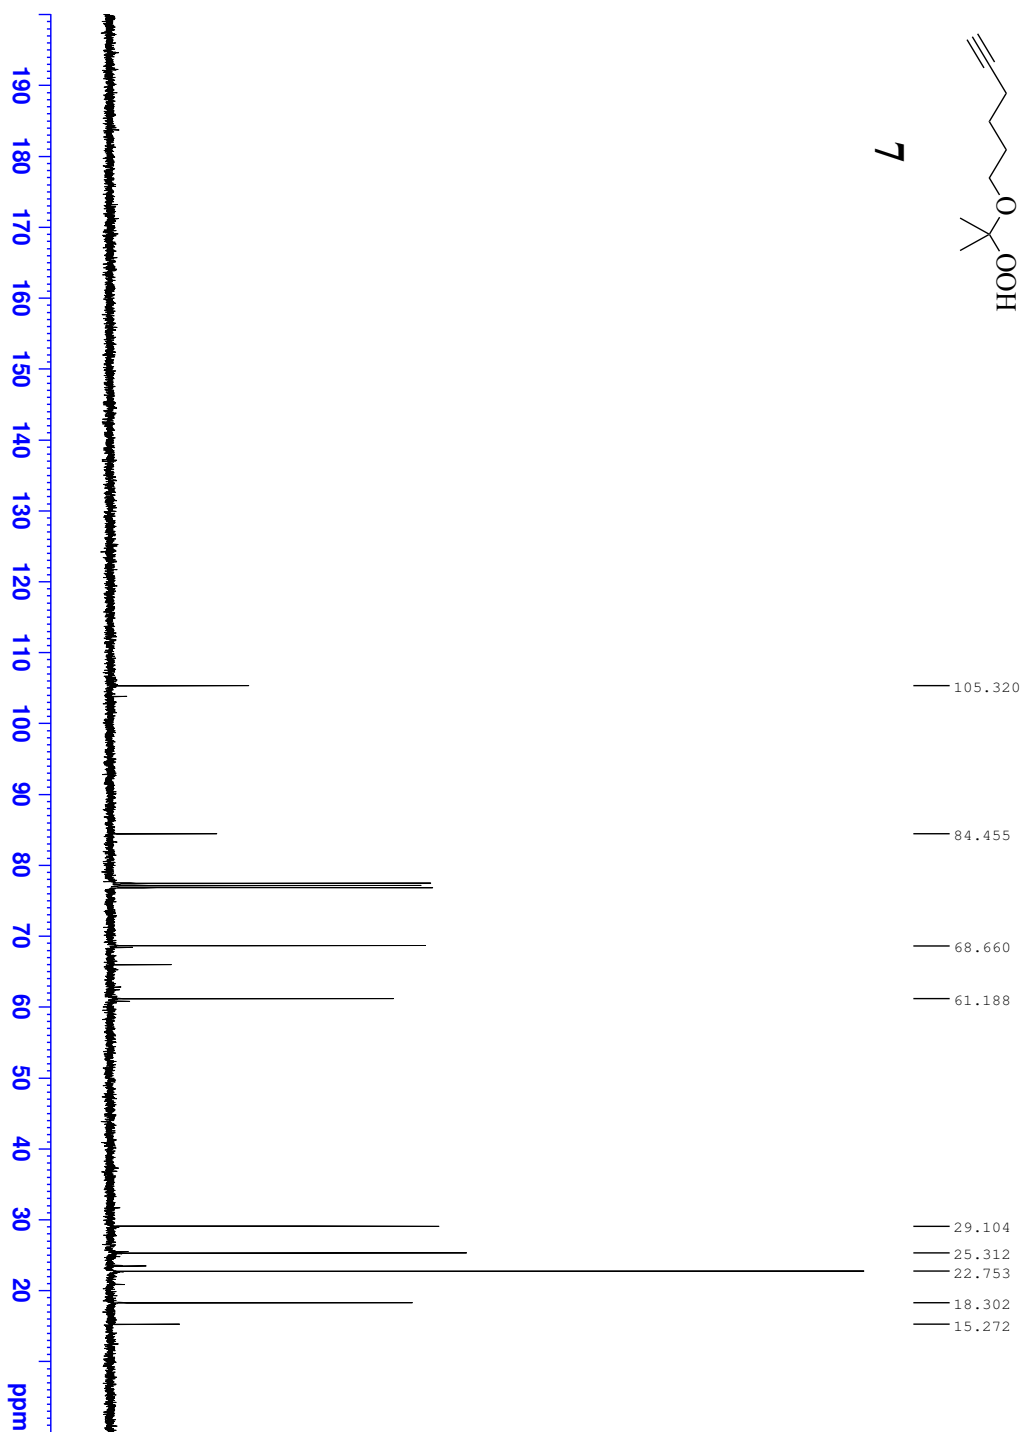





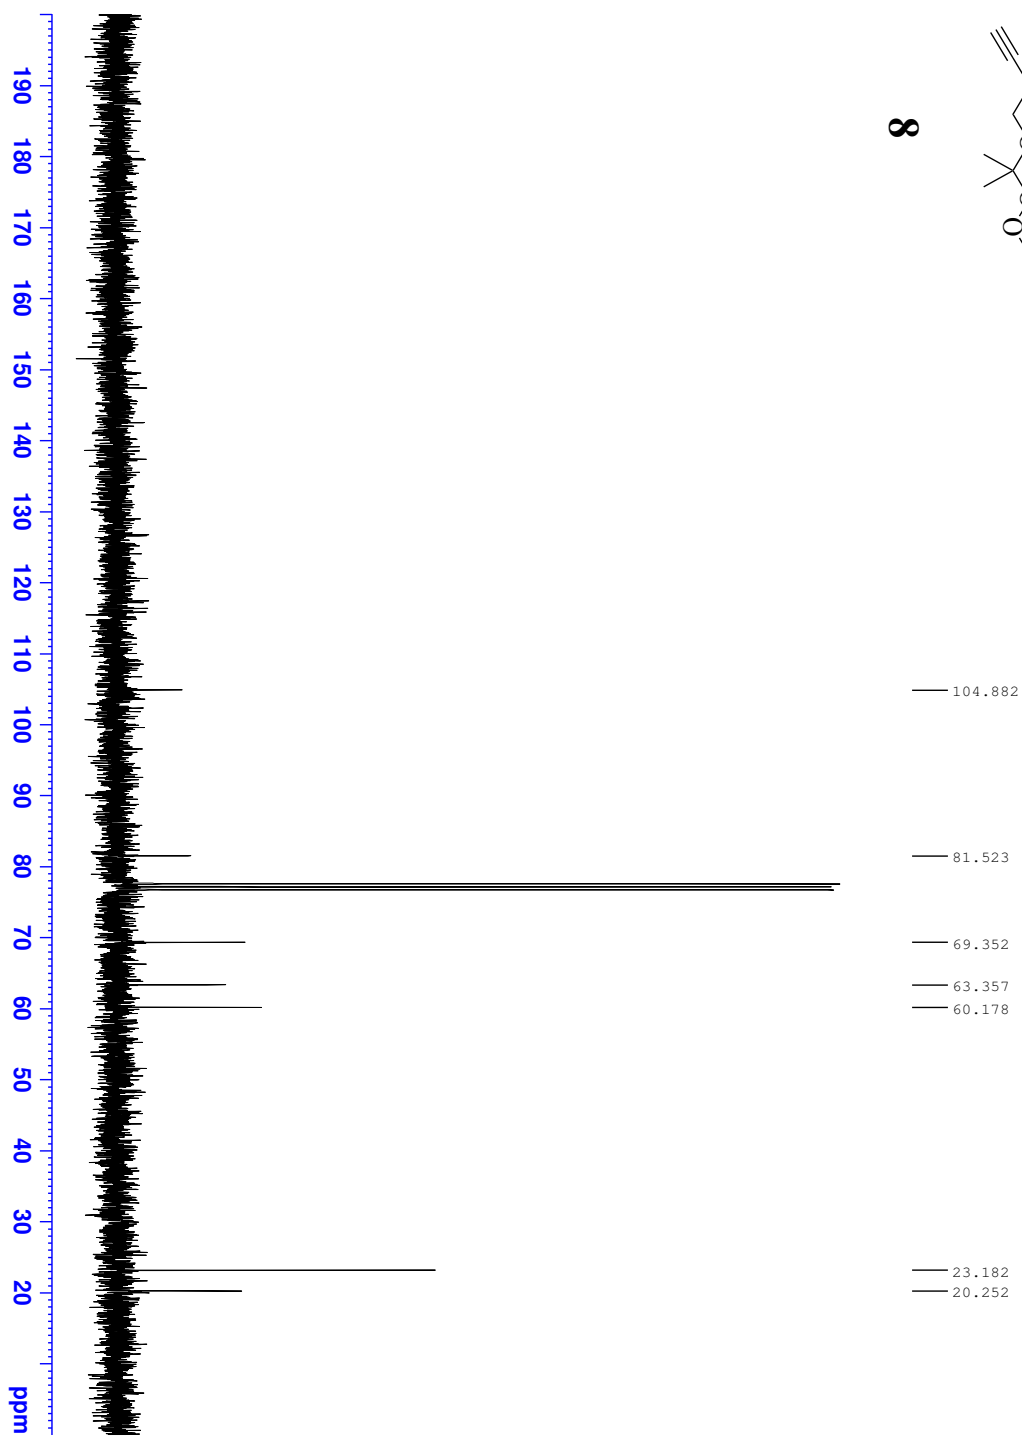

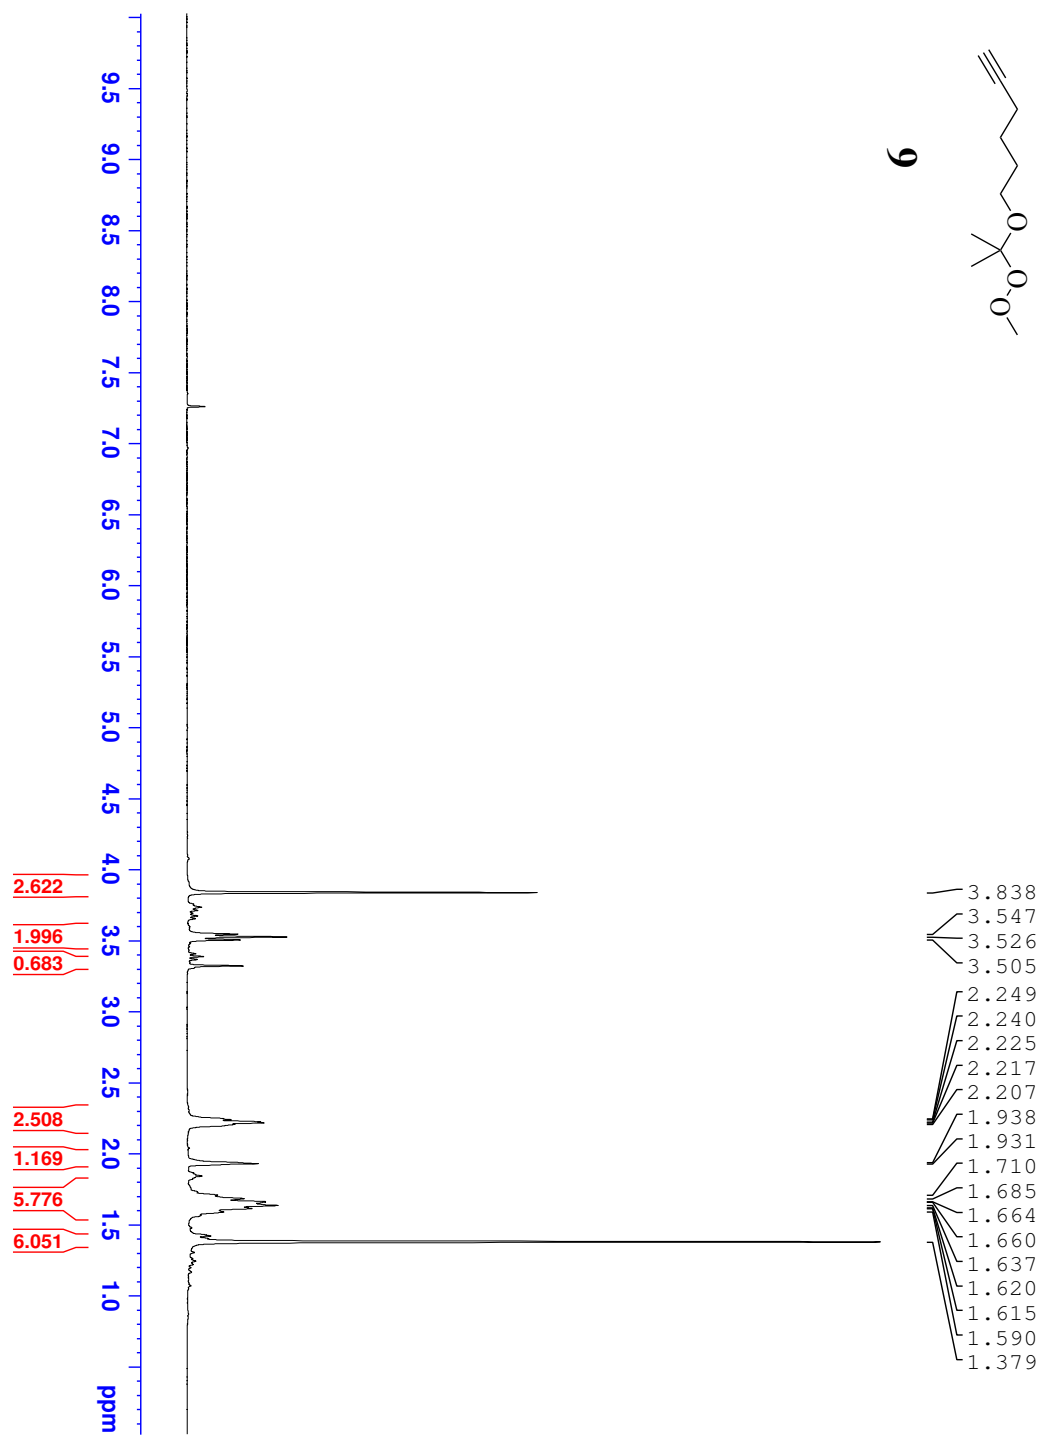

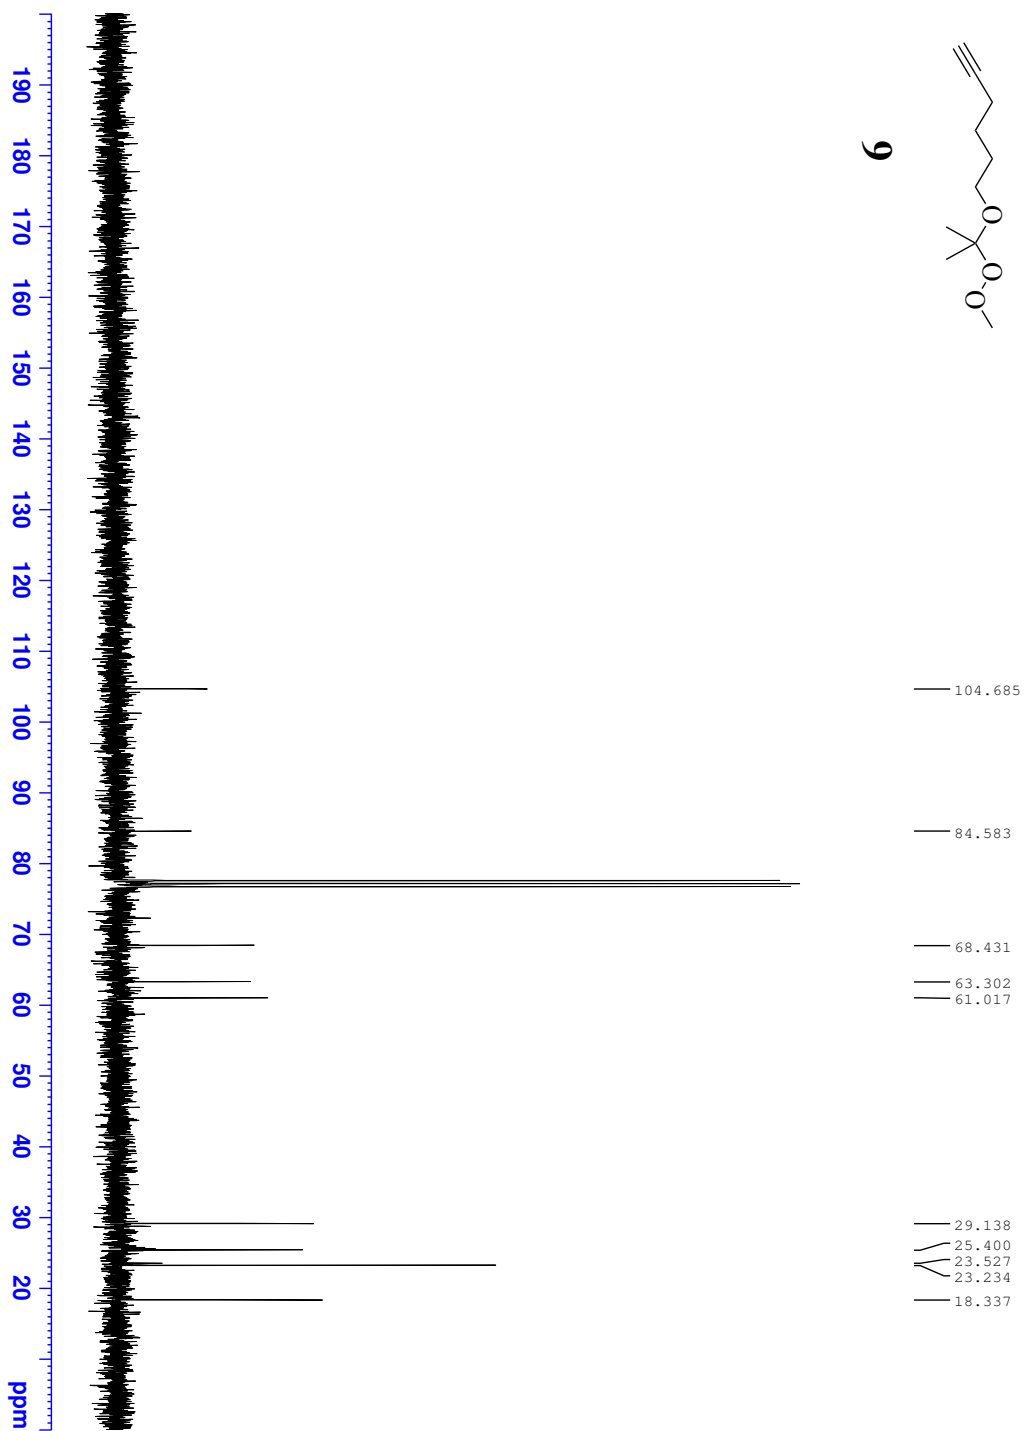

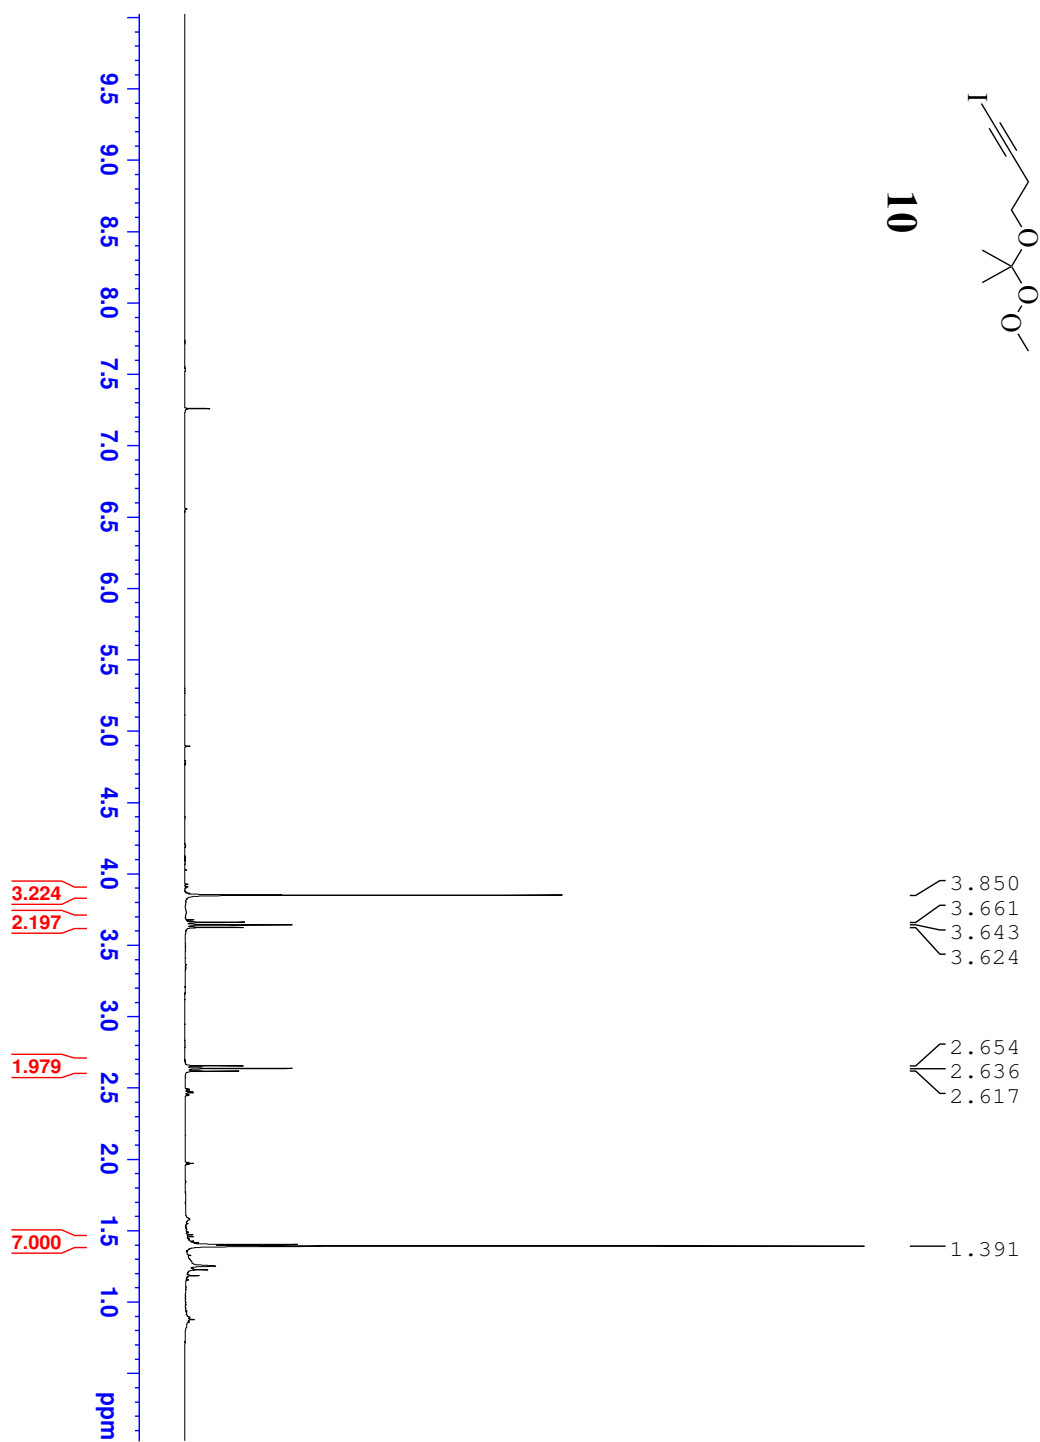

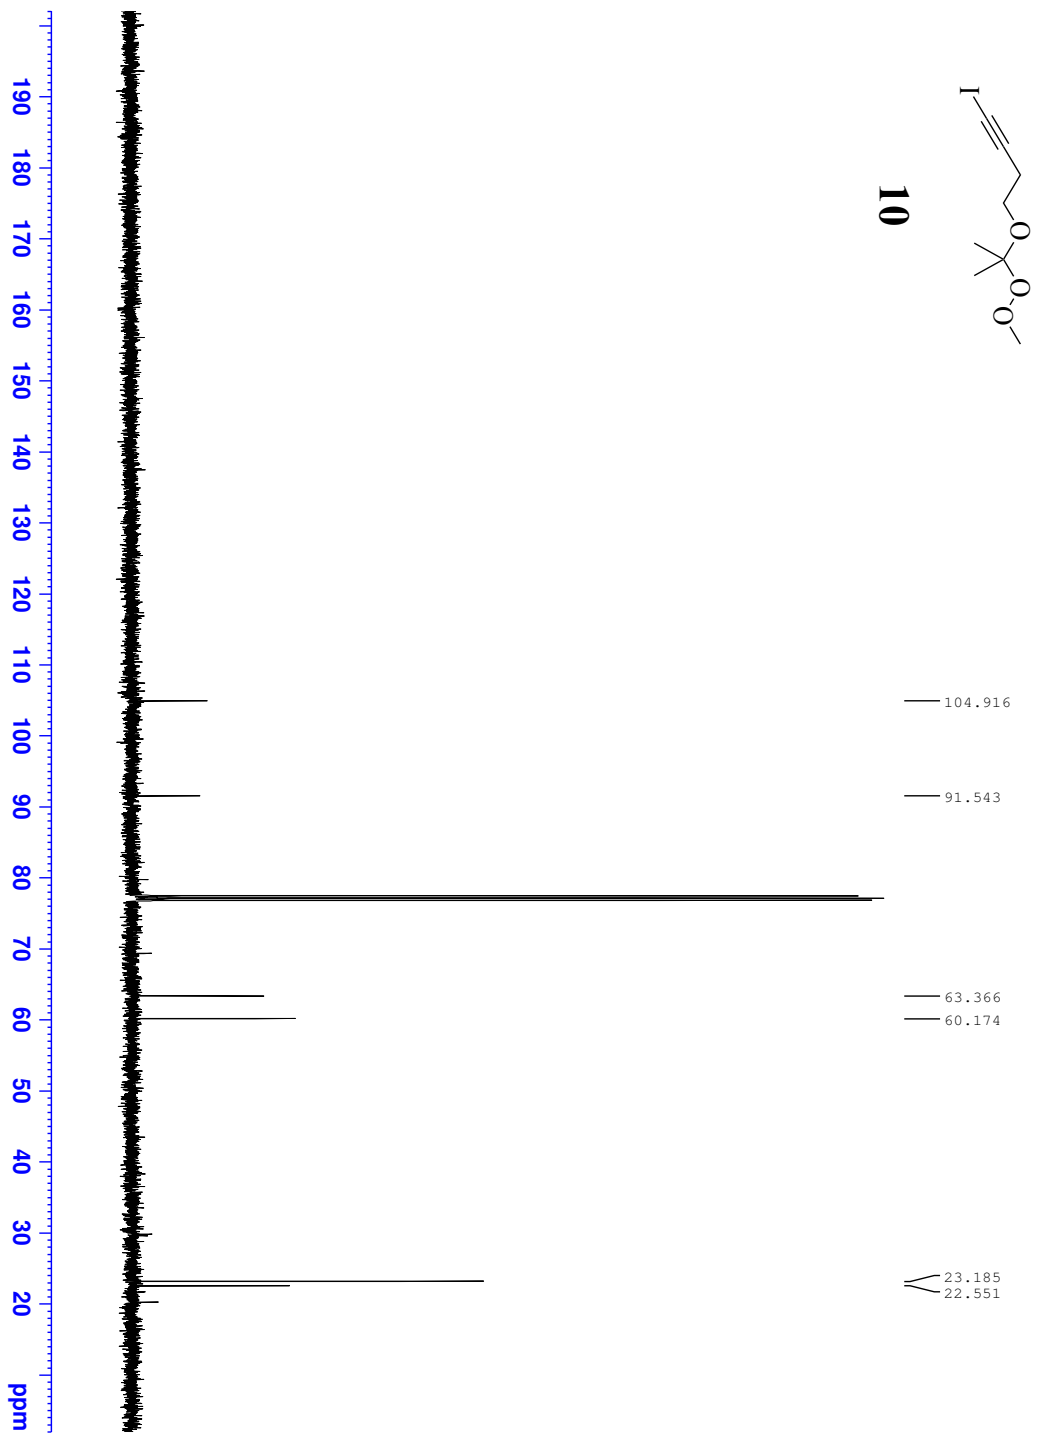

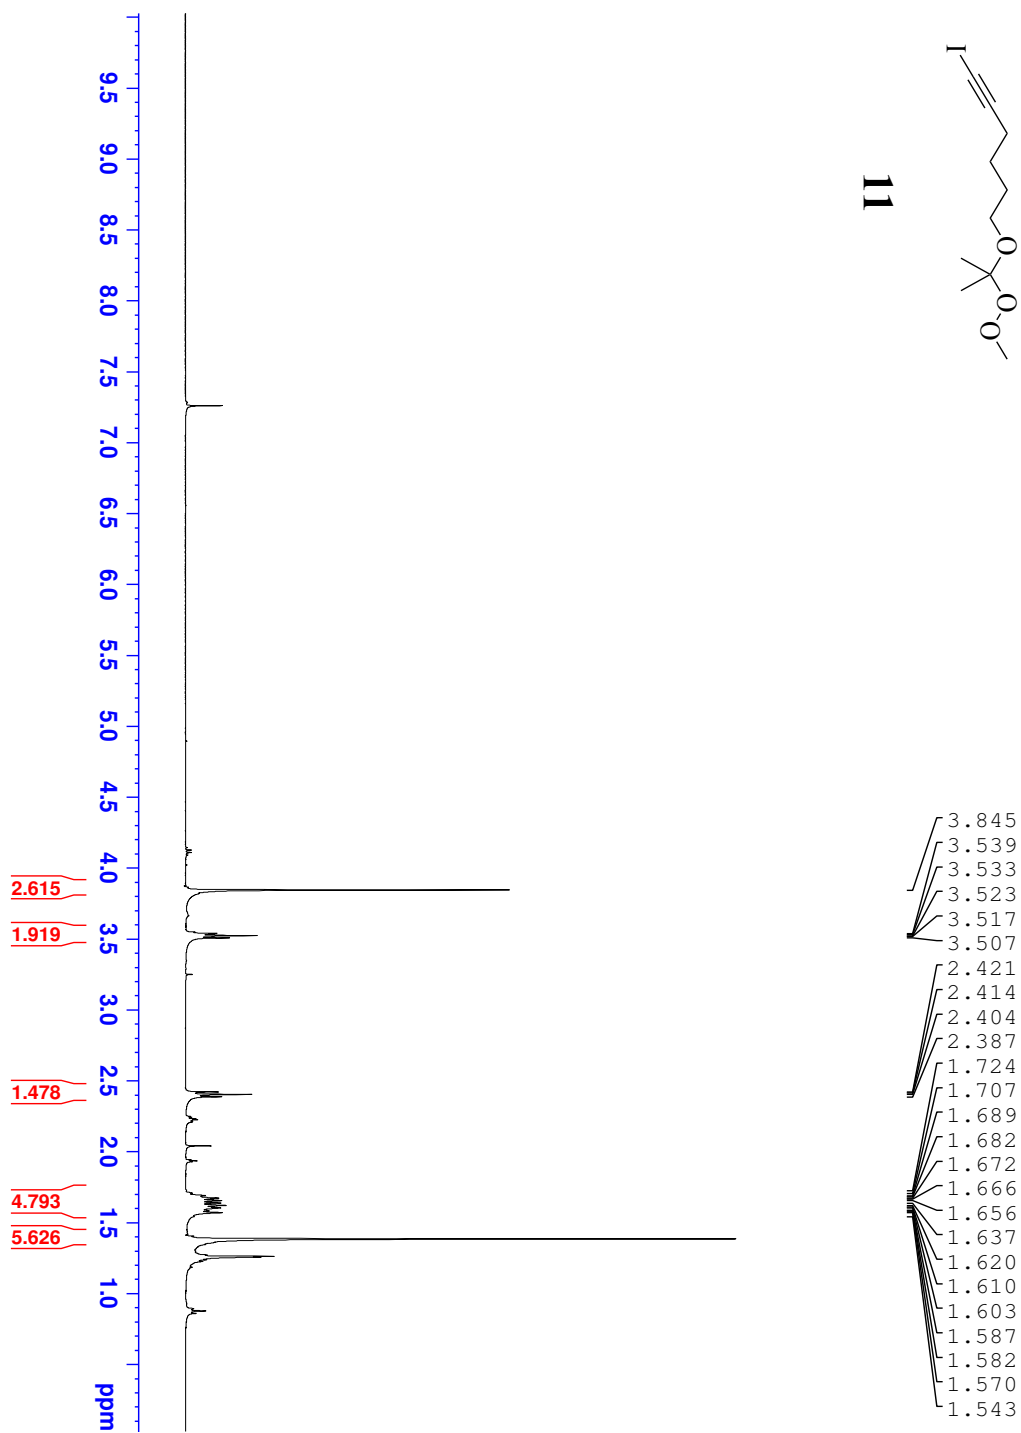

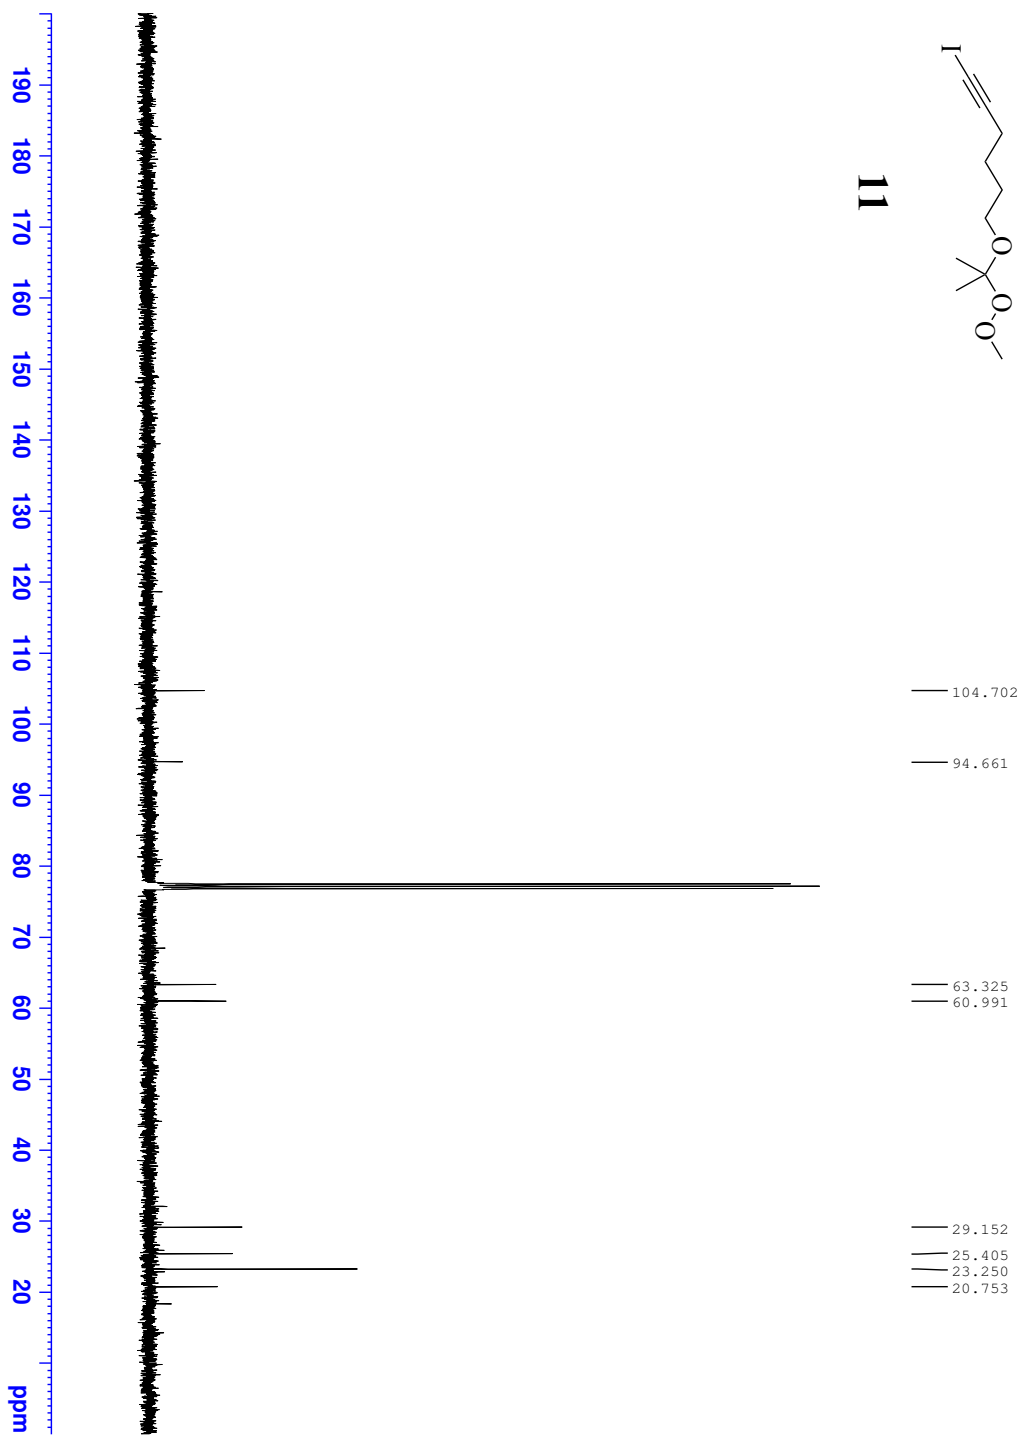

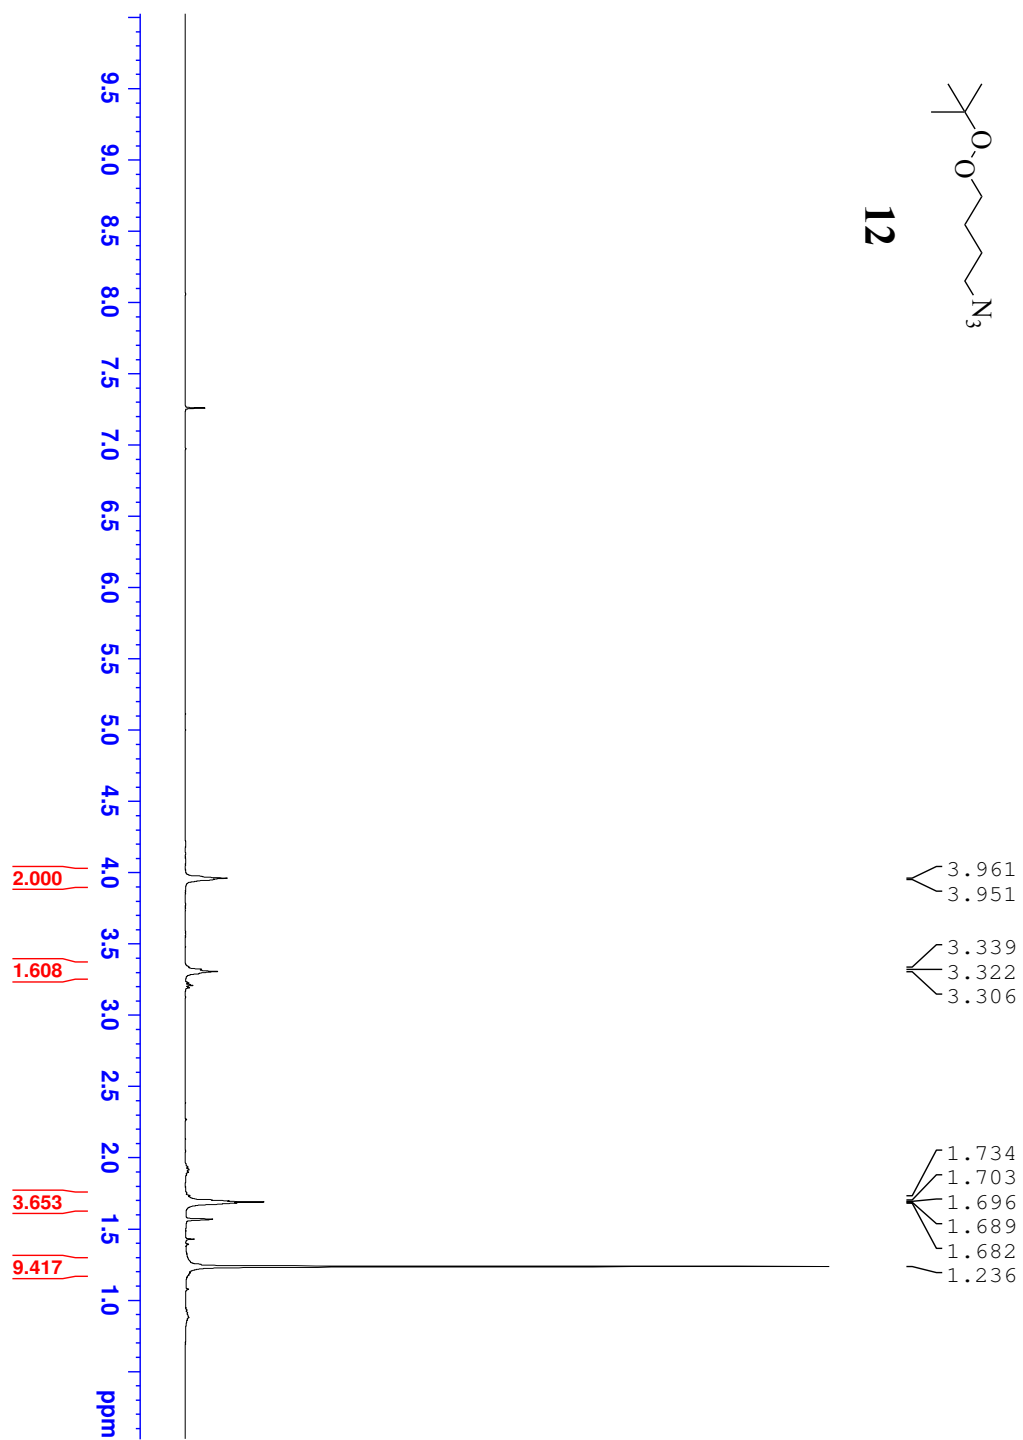



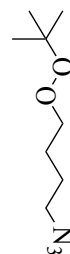

**12**

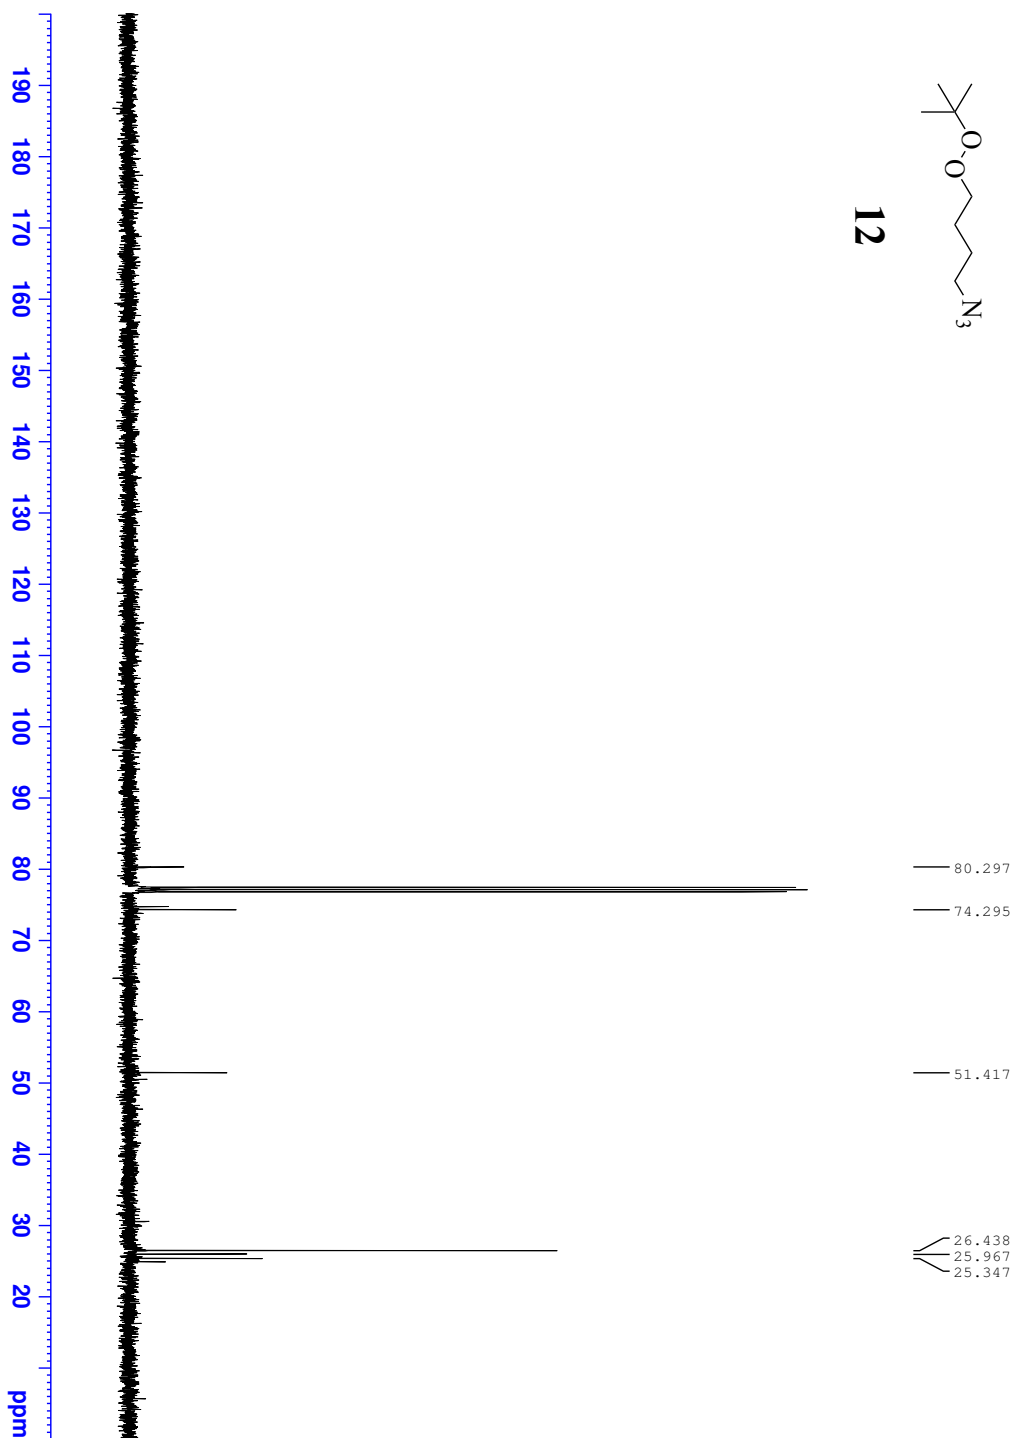

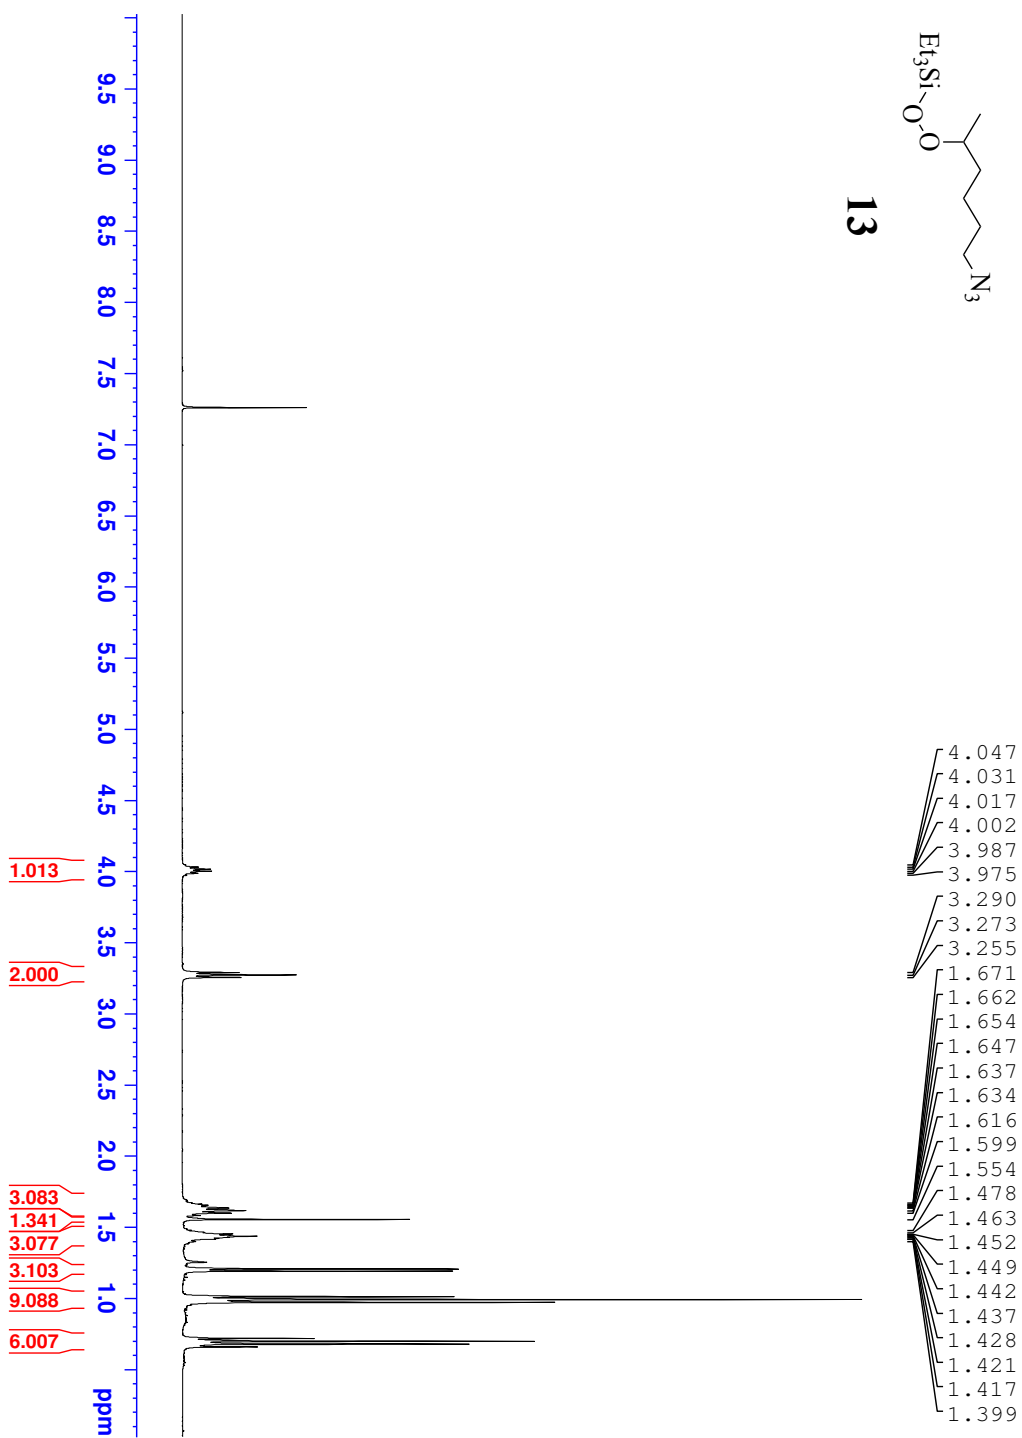

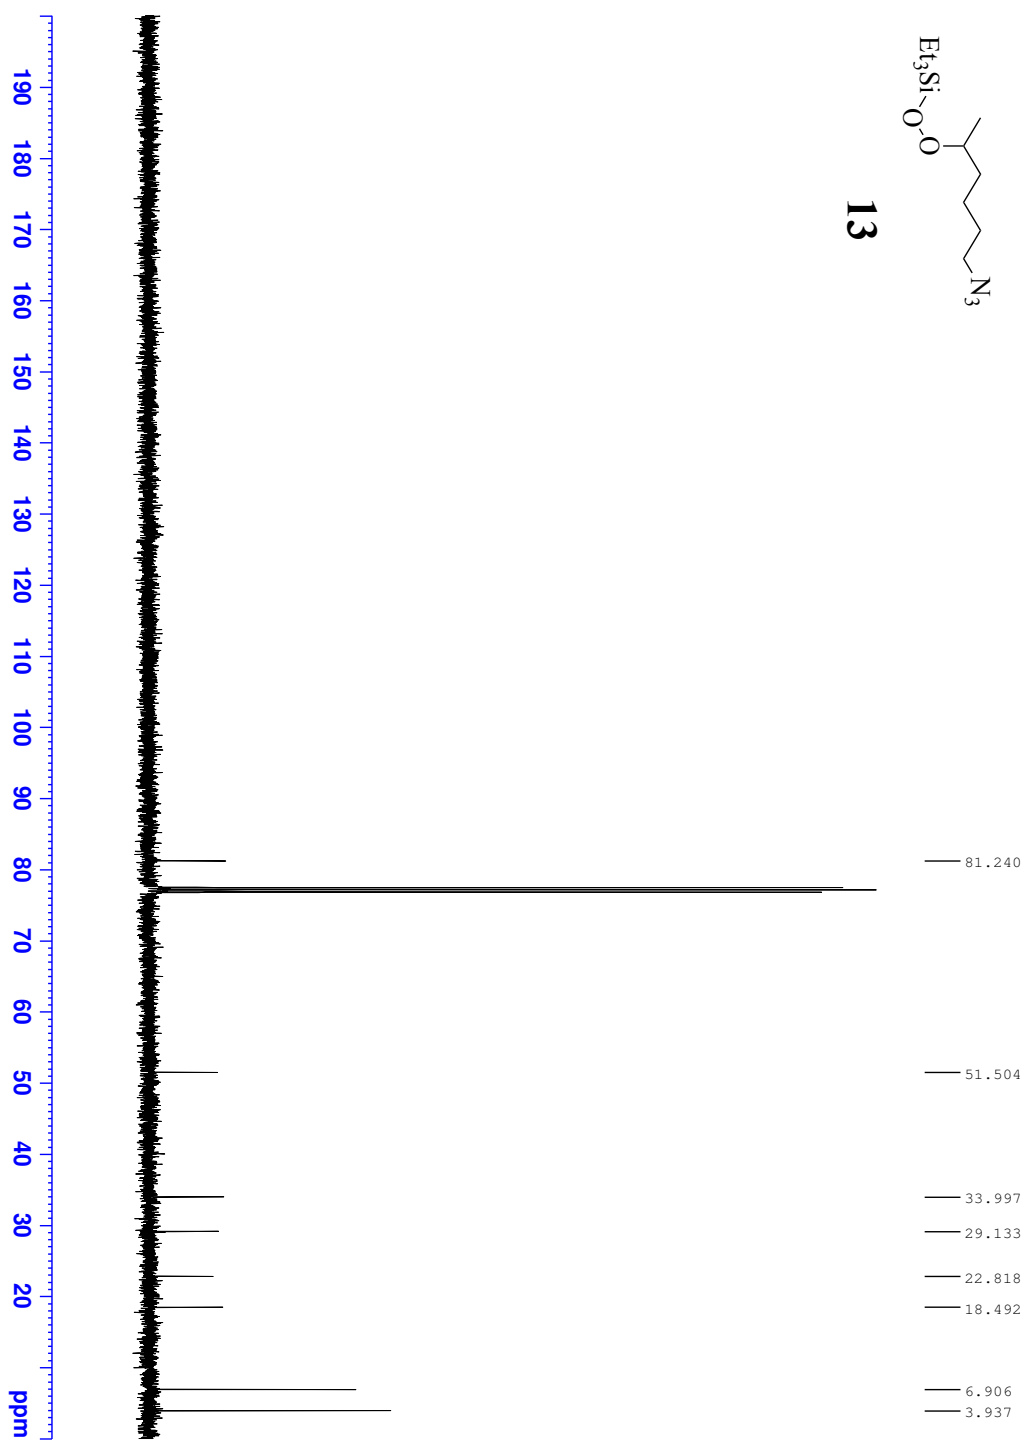

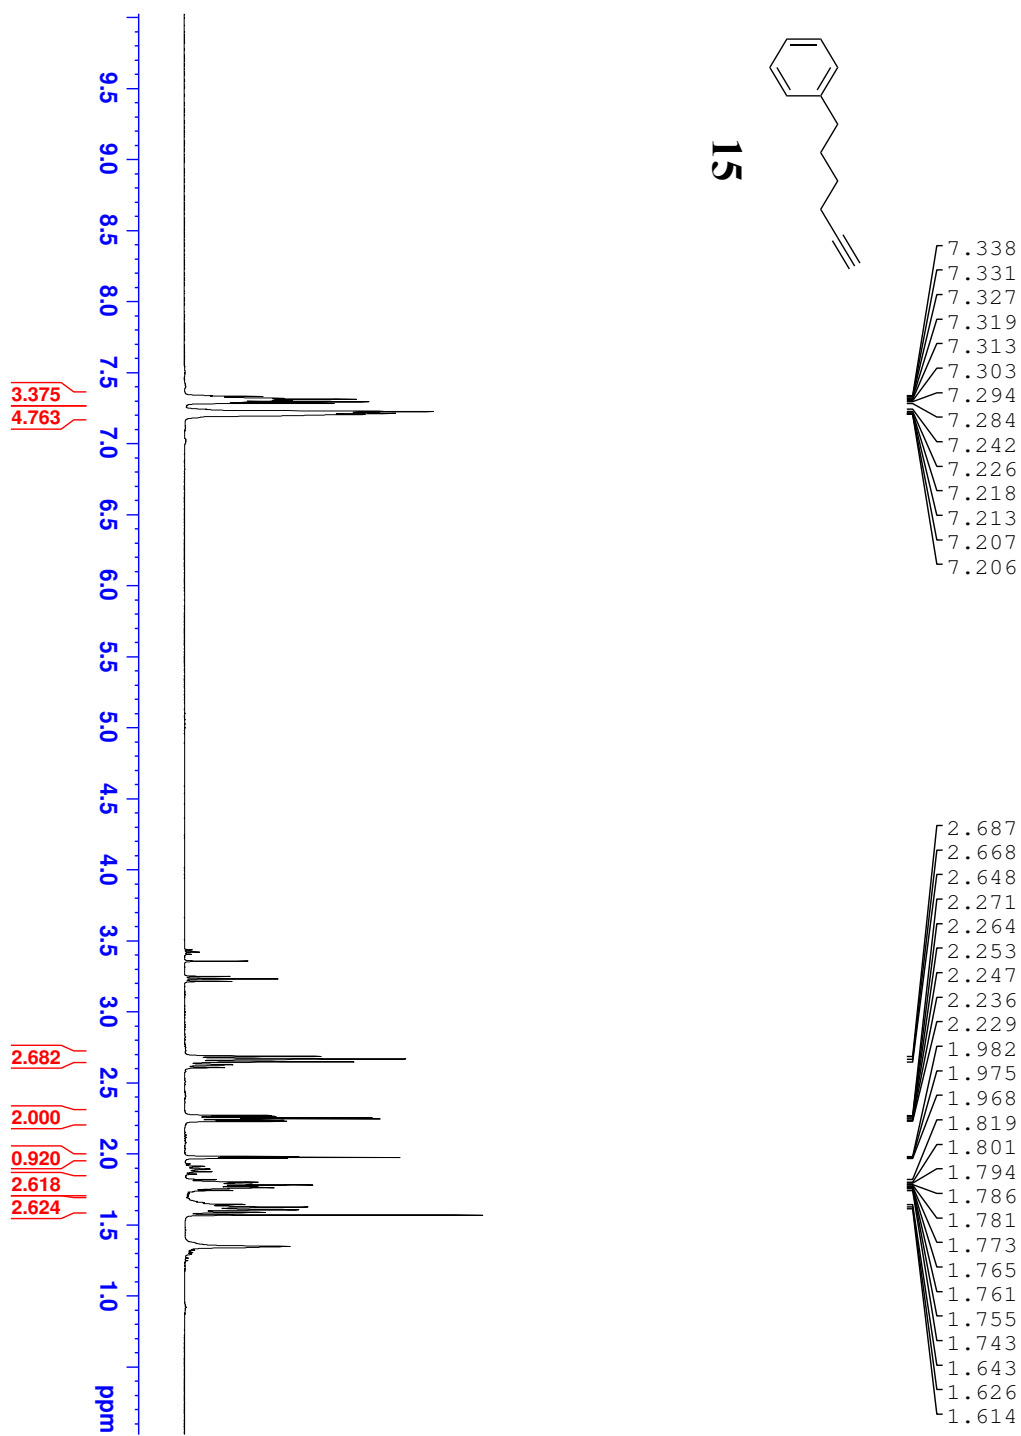

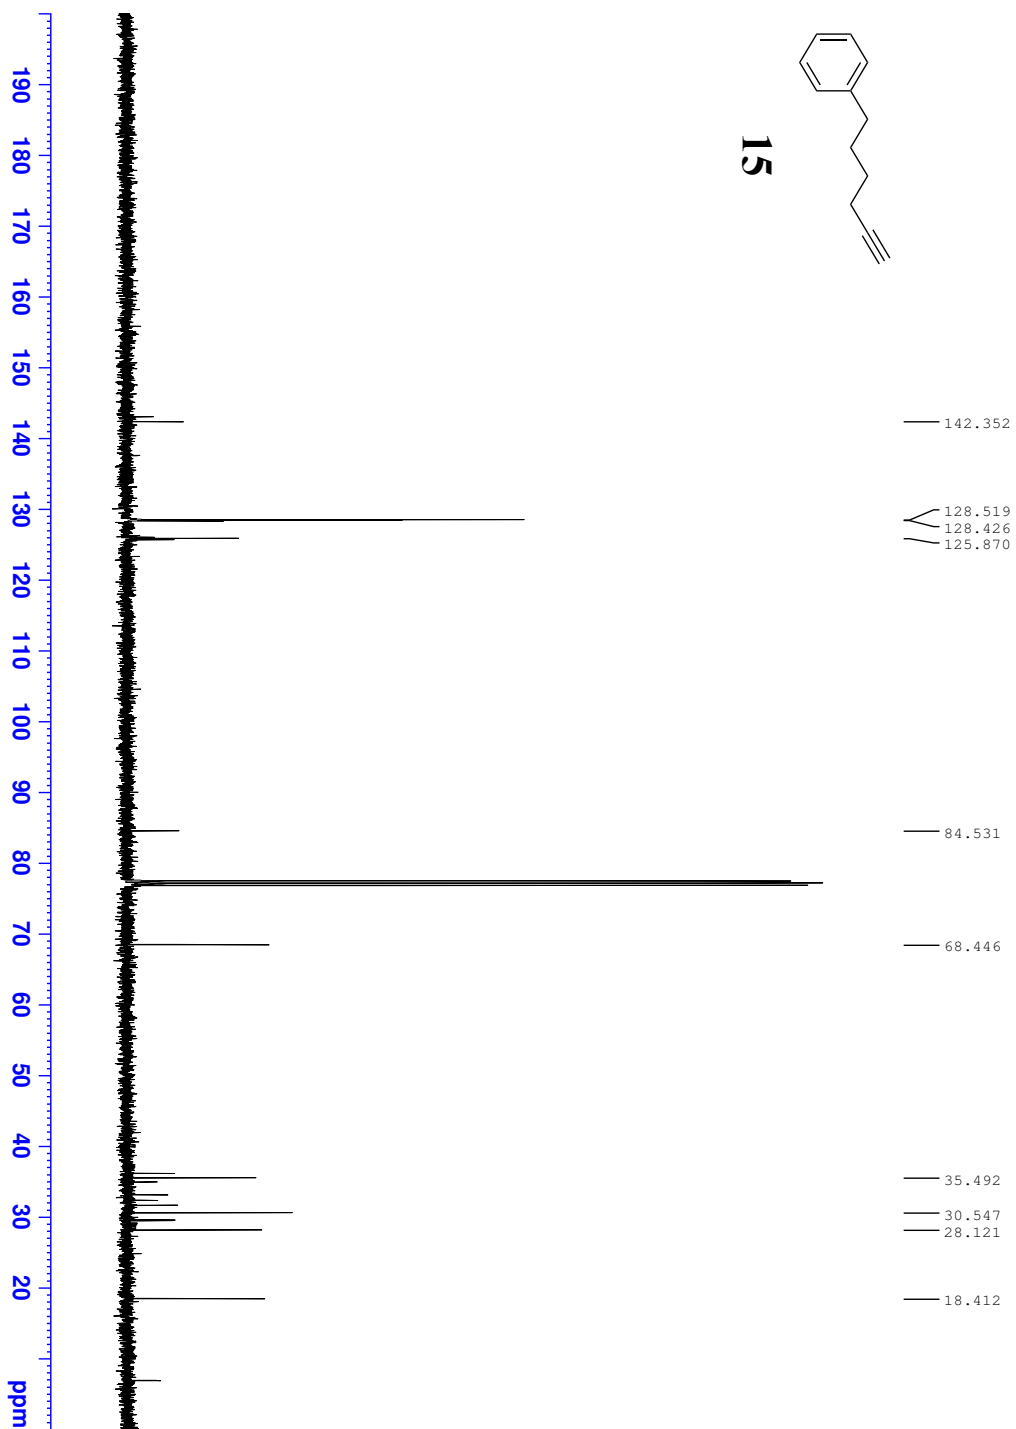

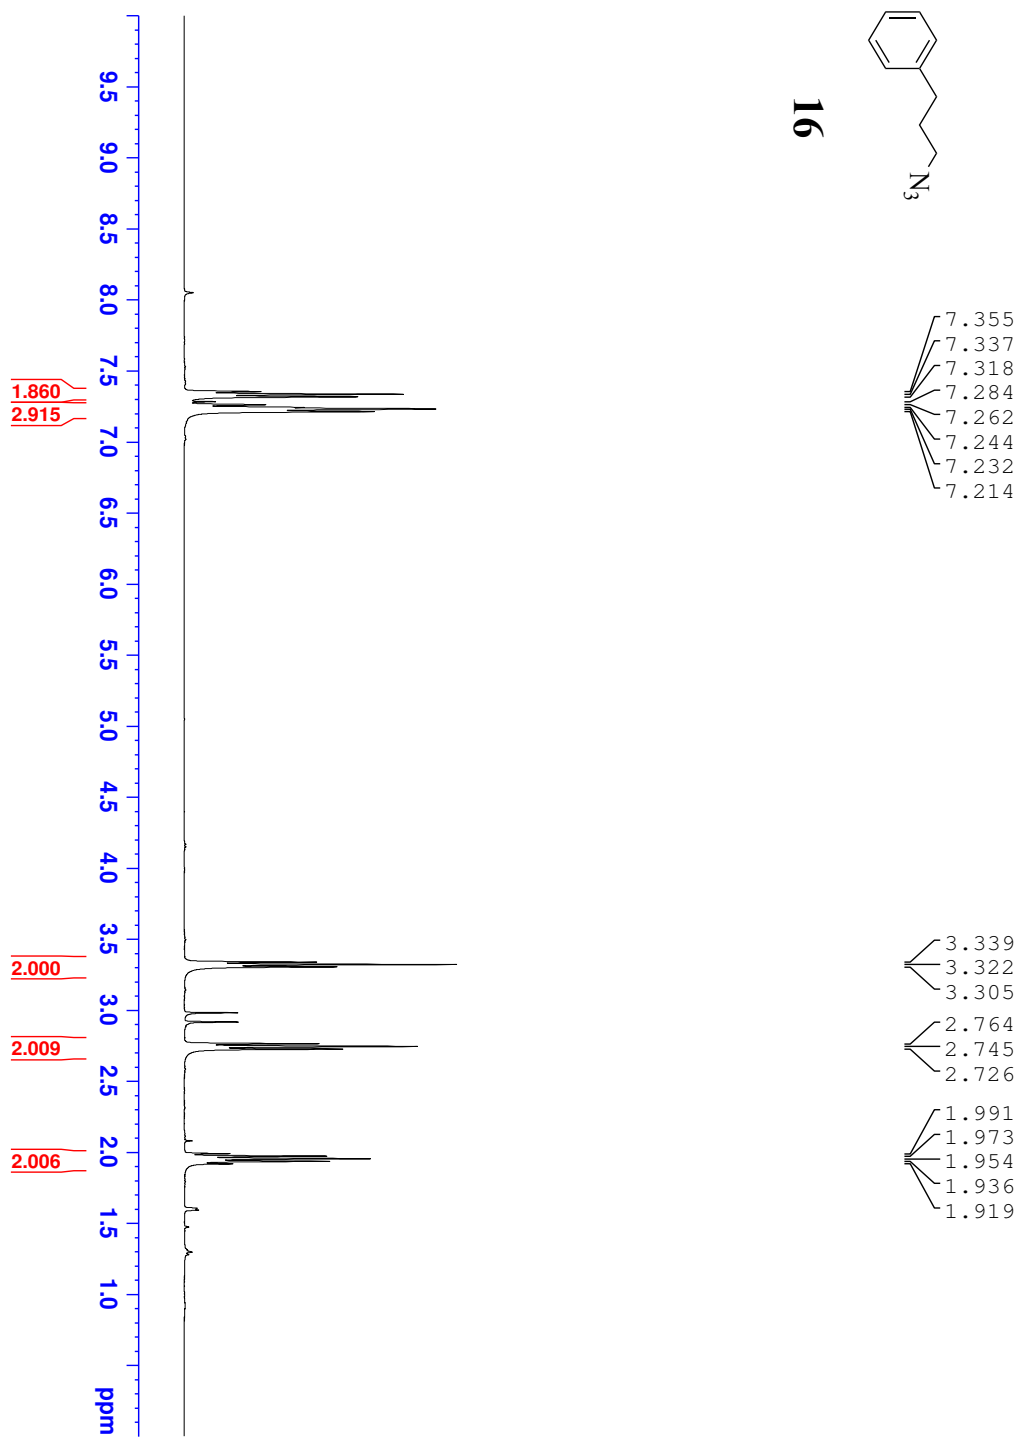

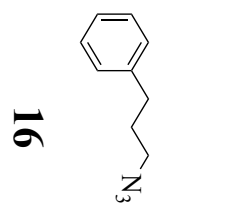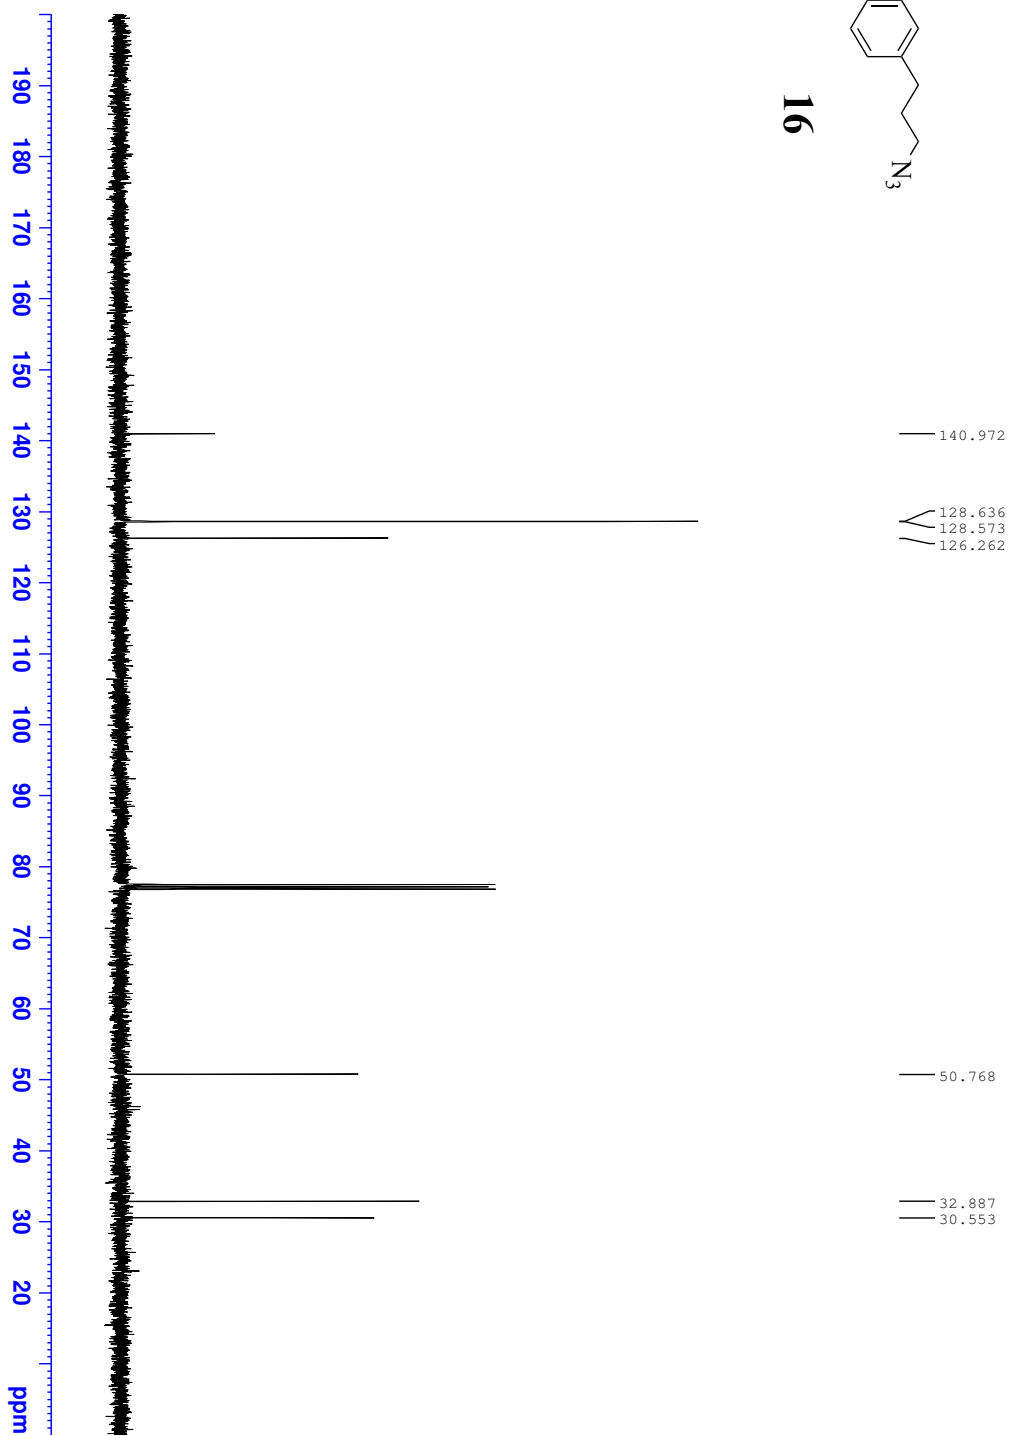

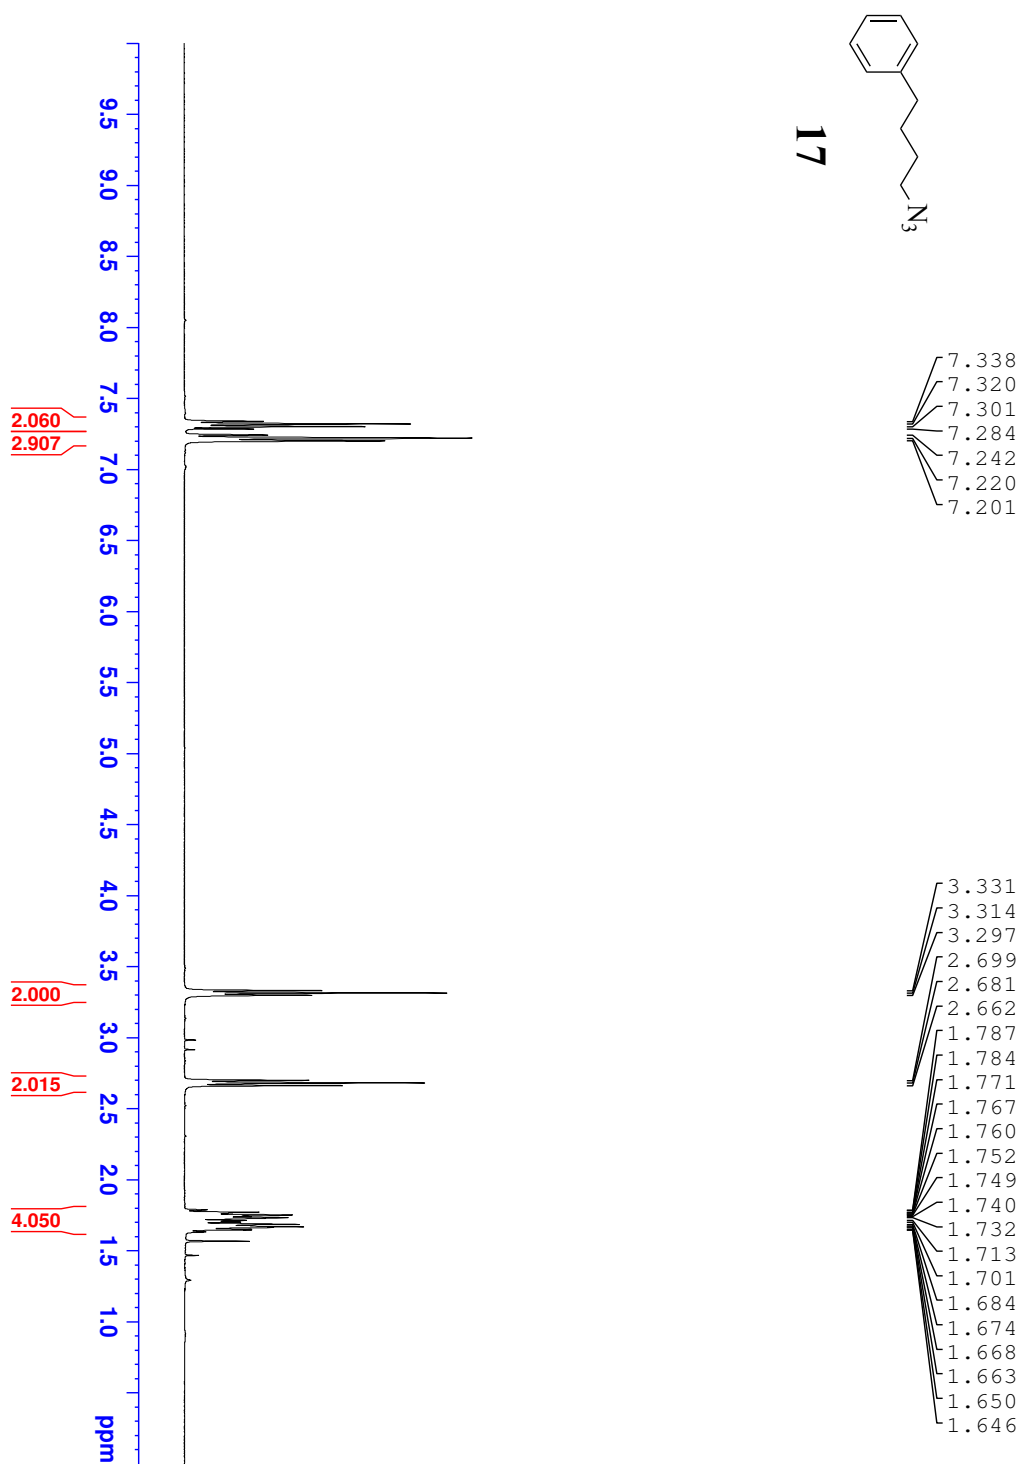



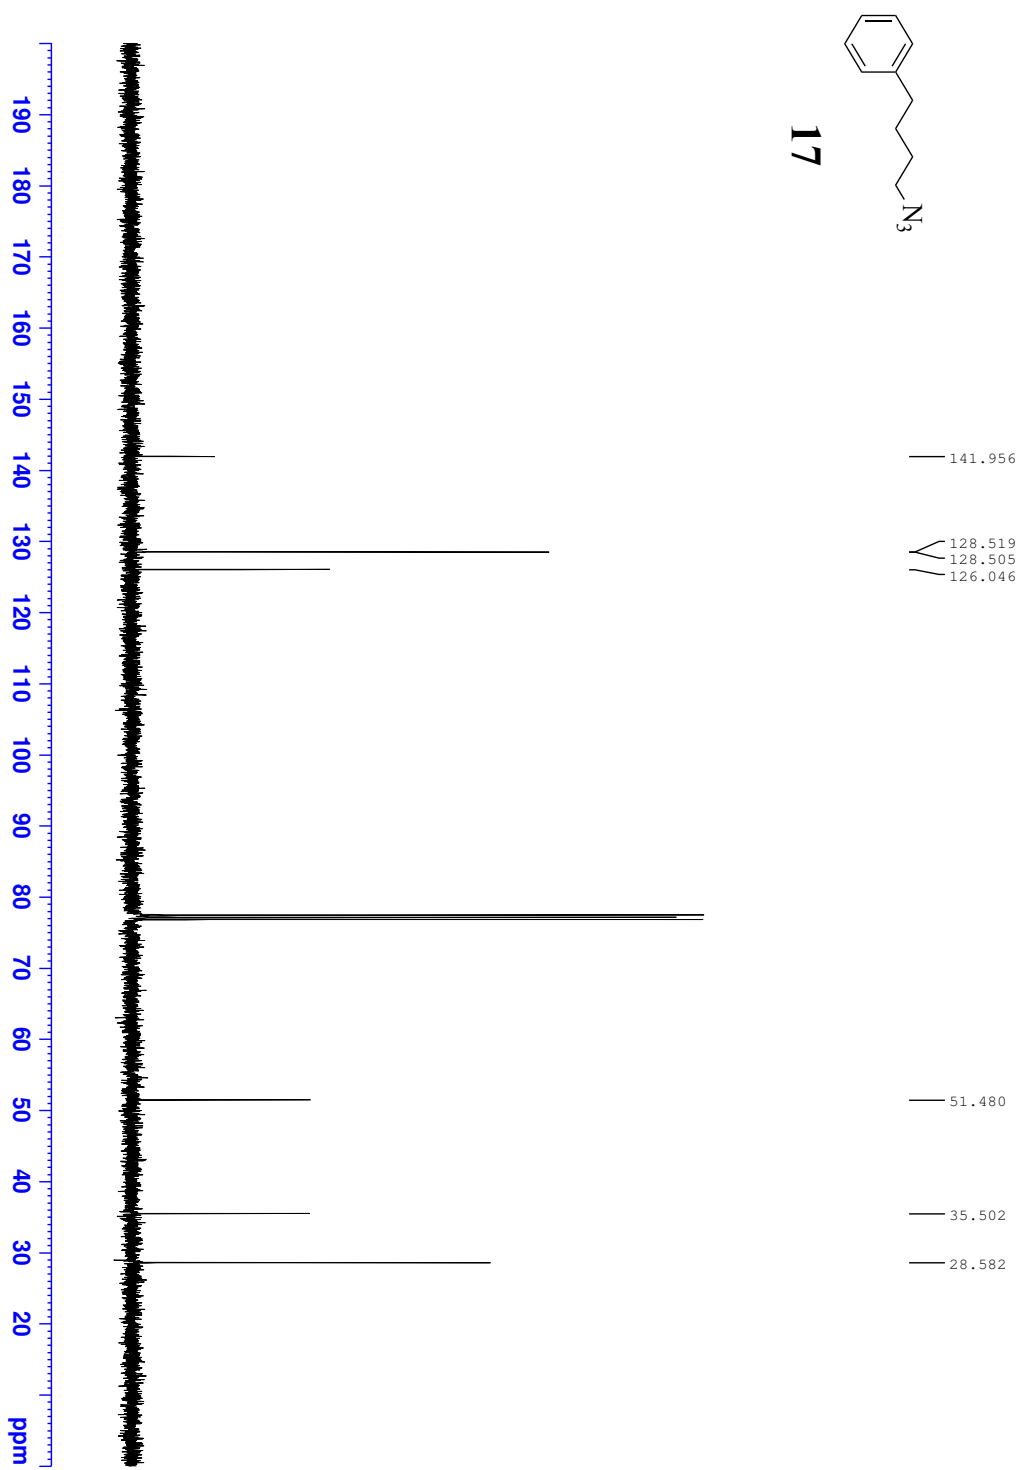

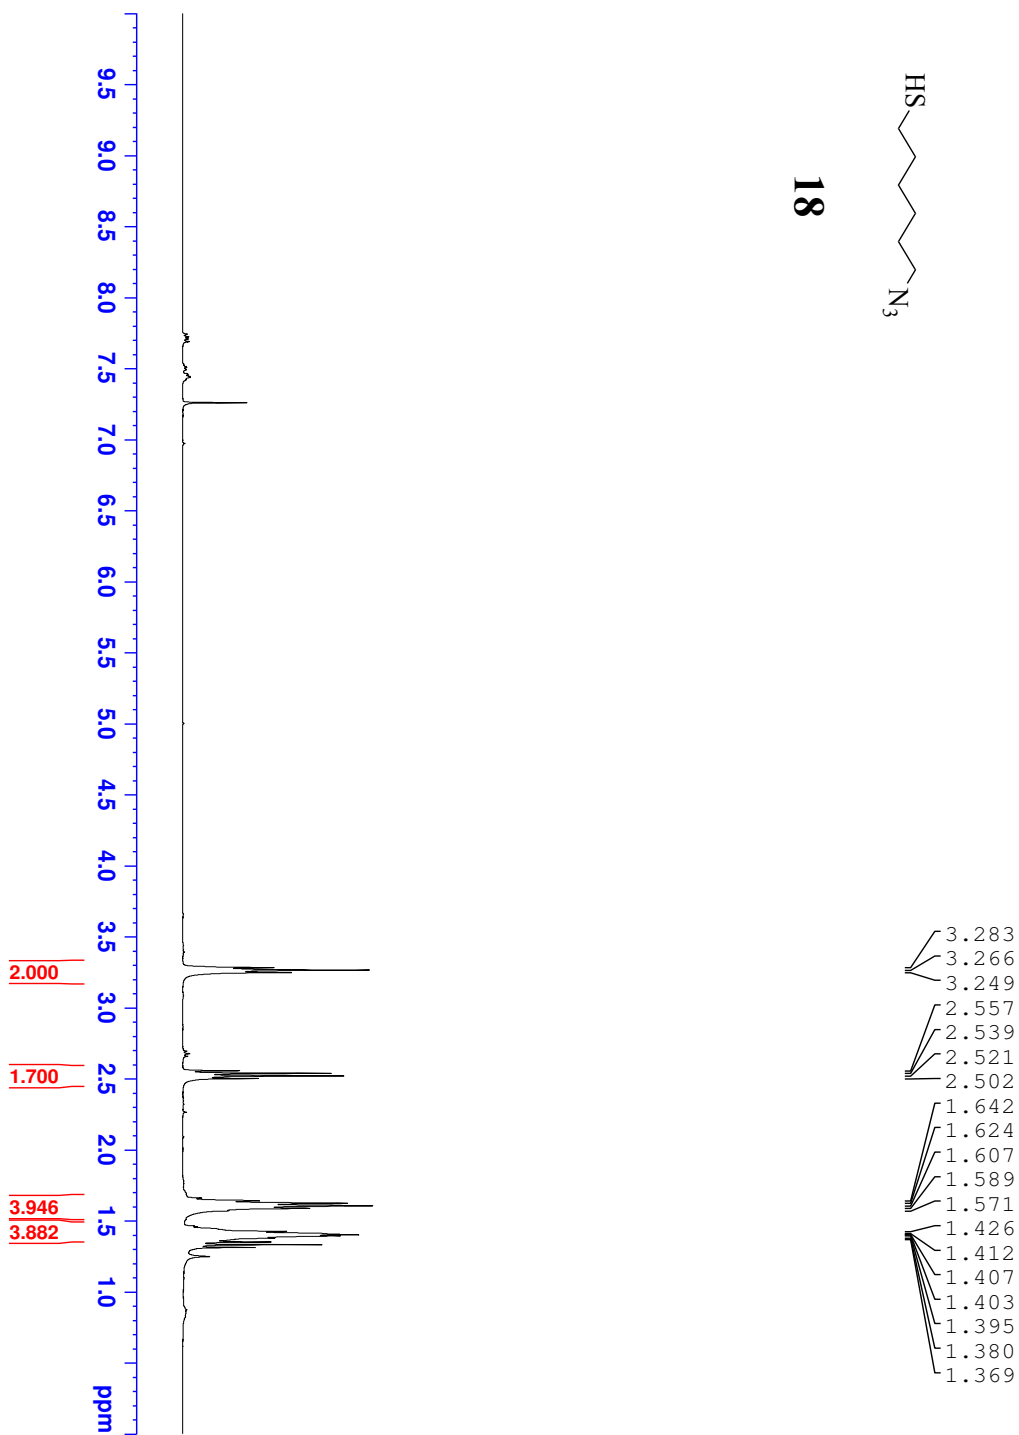

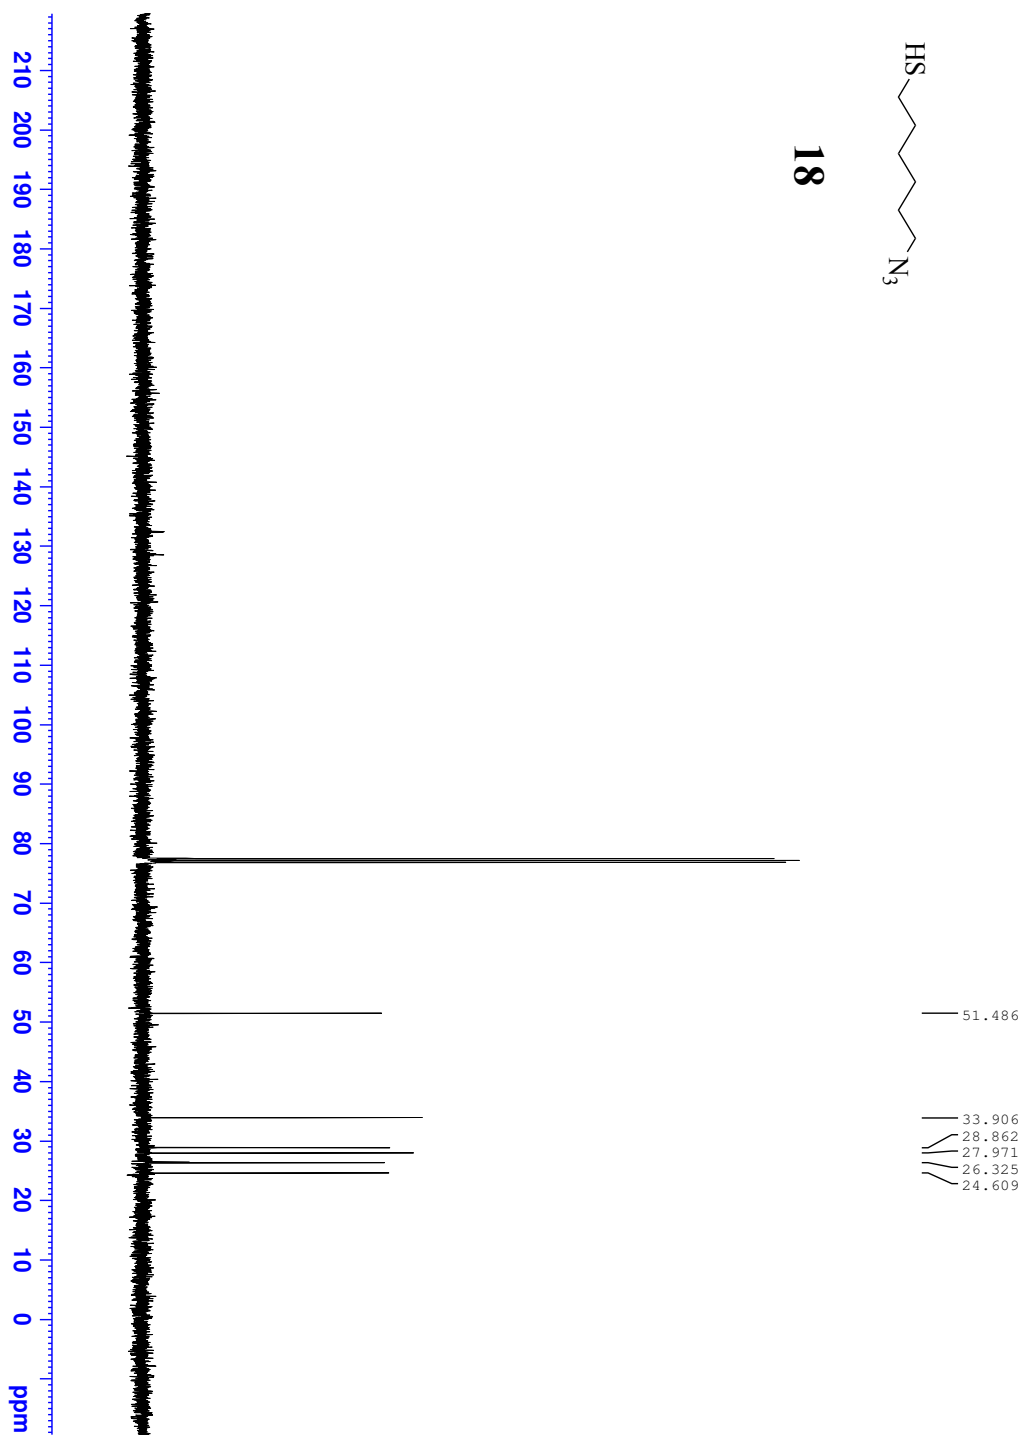

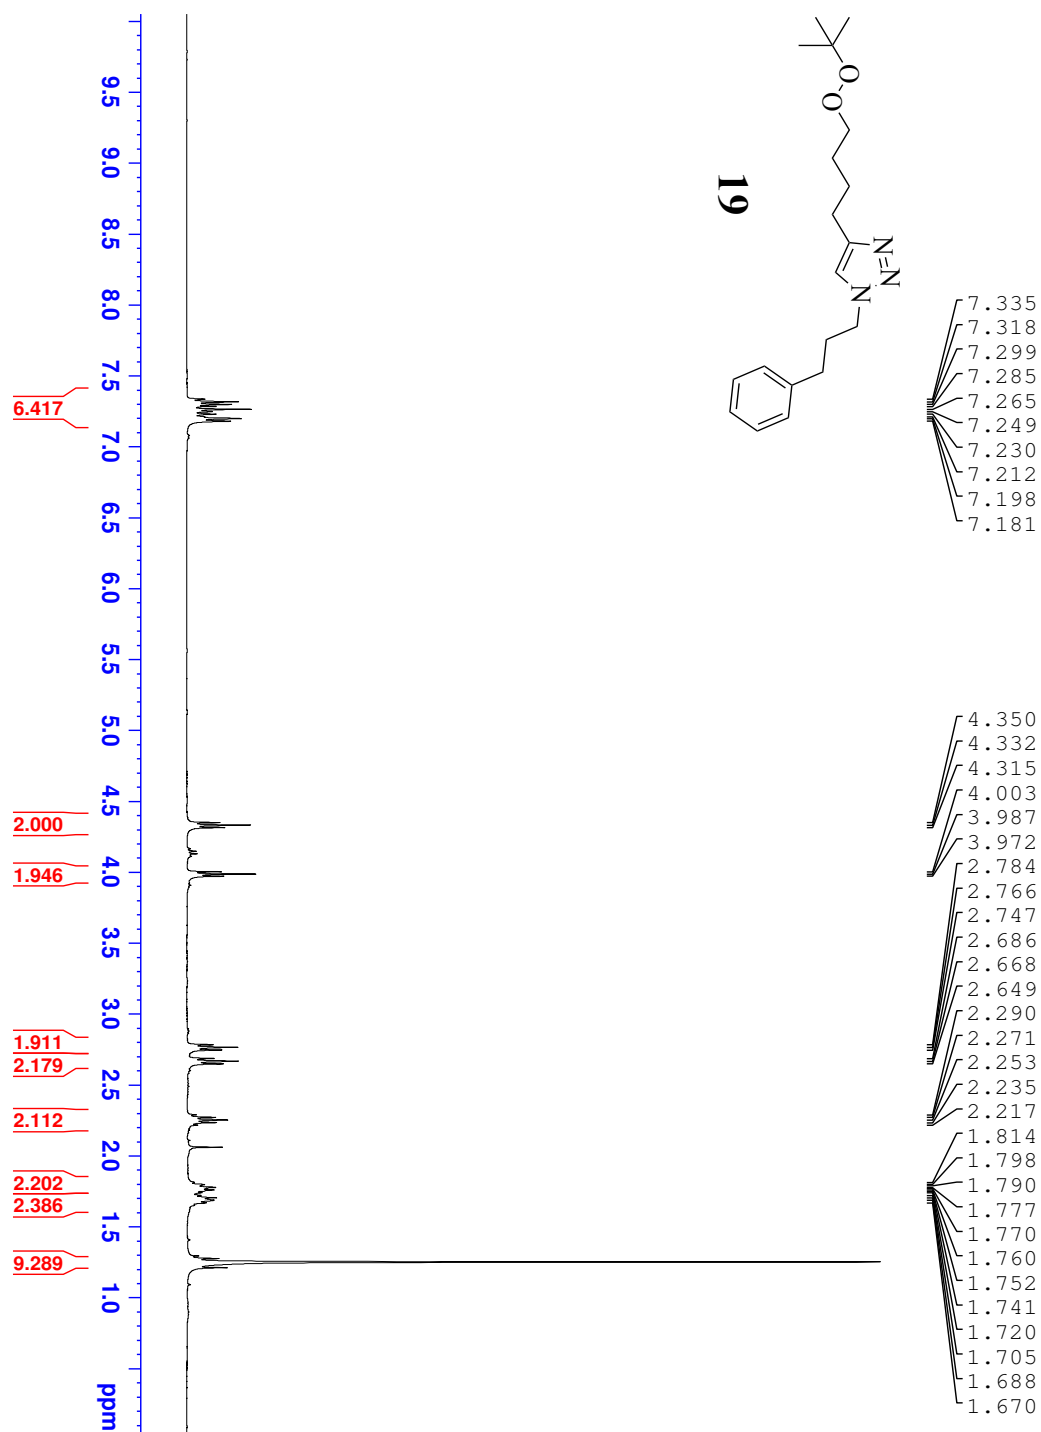

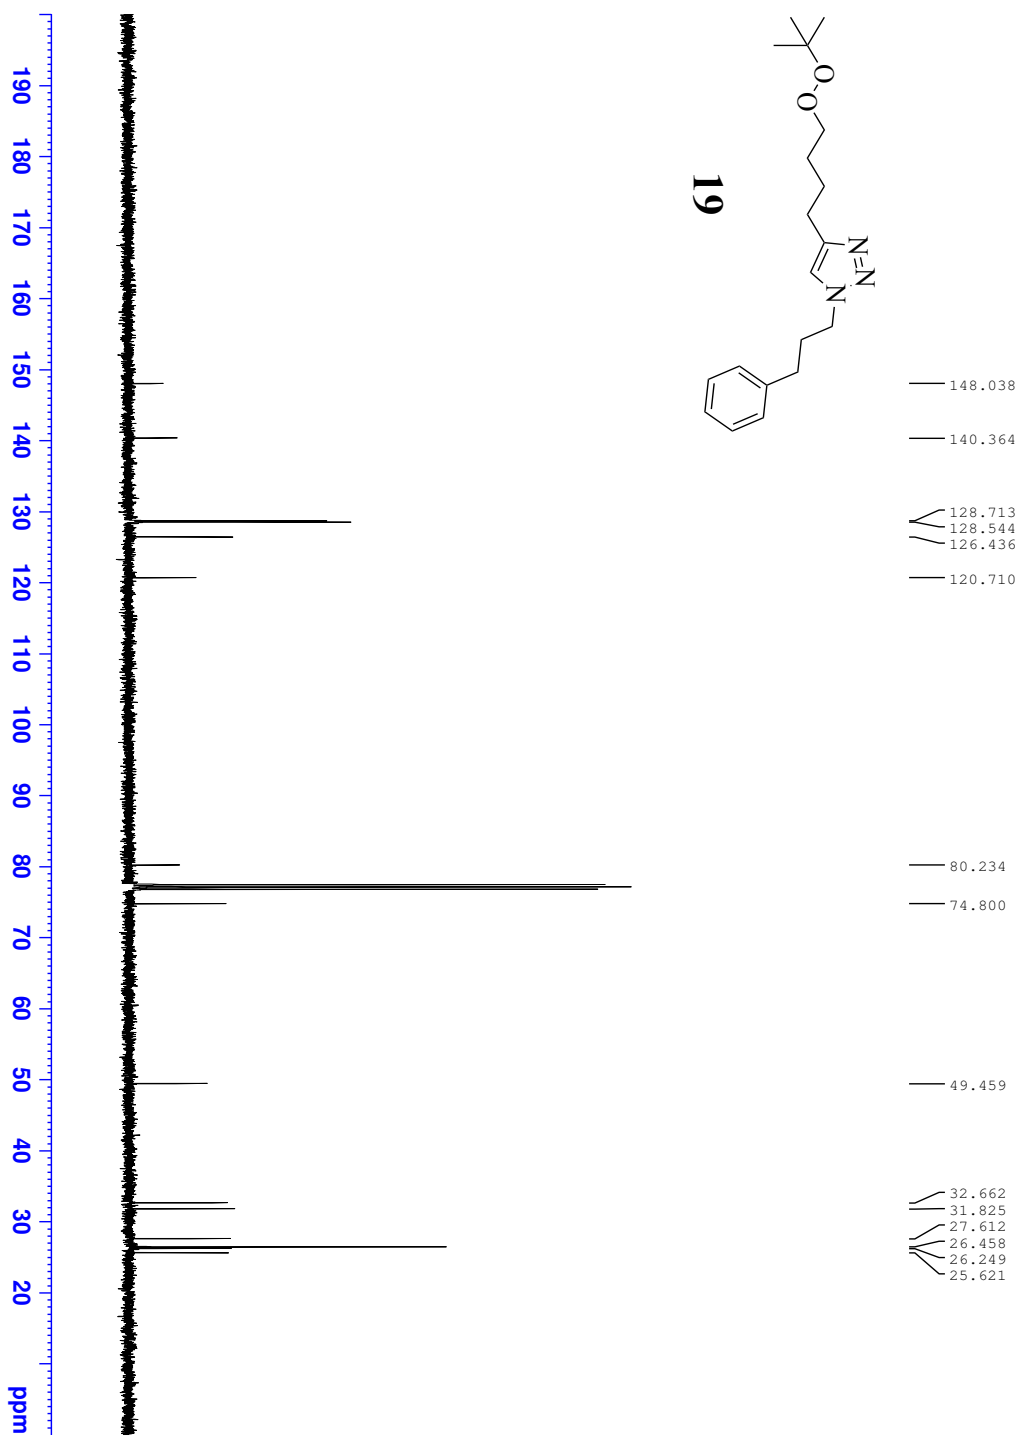

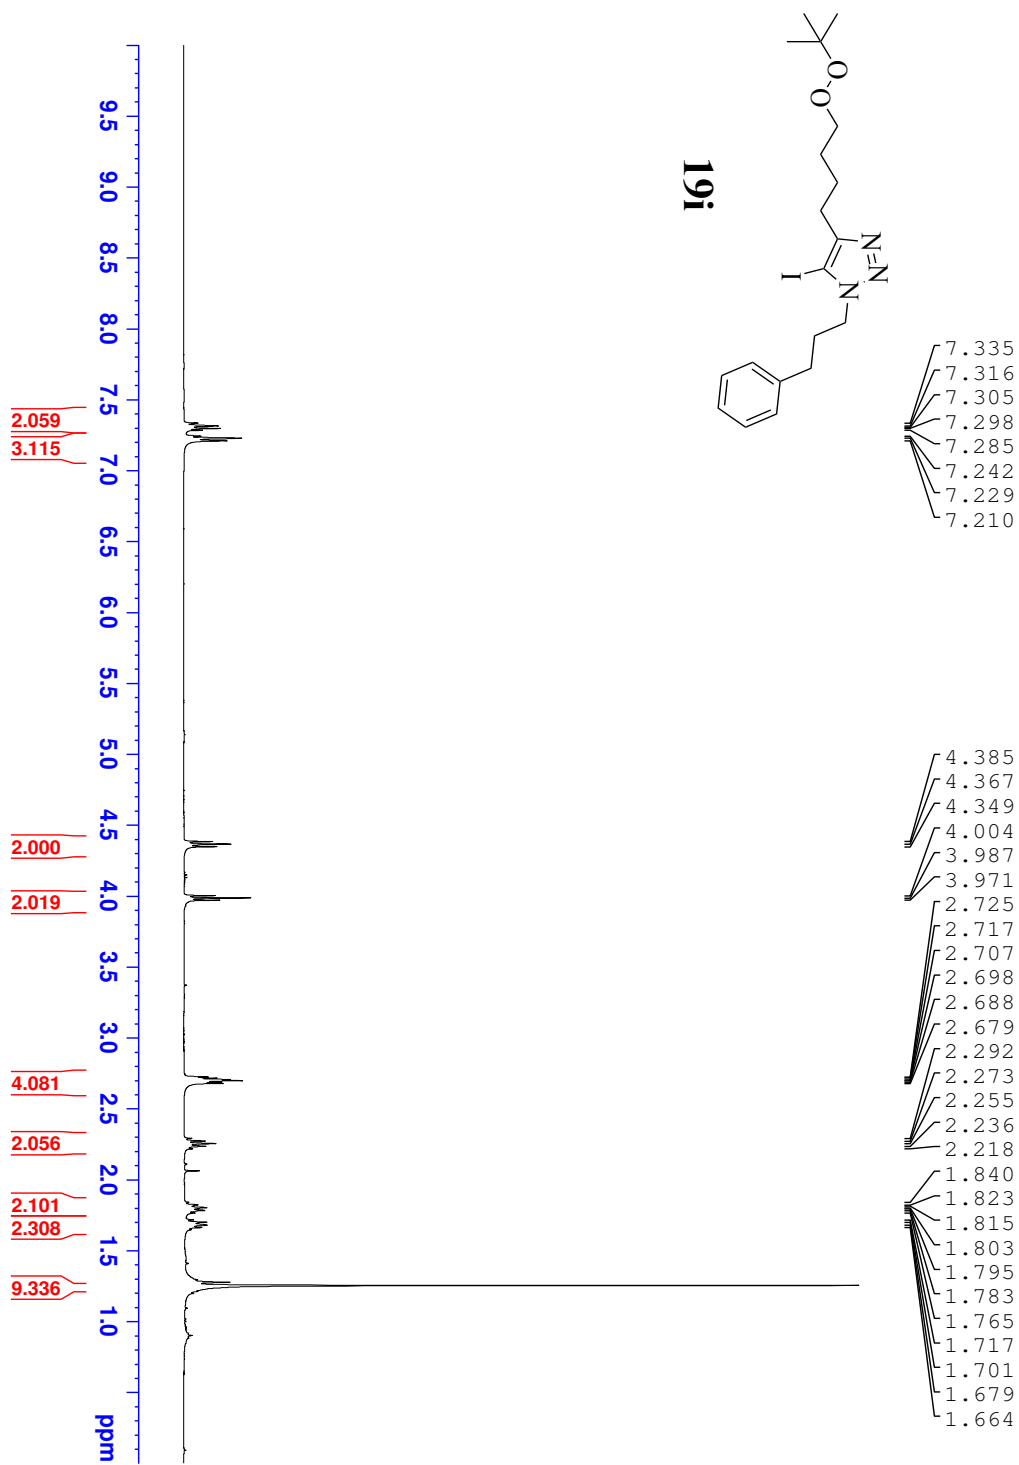

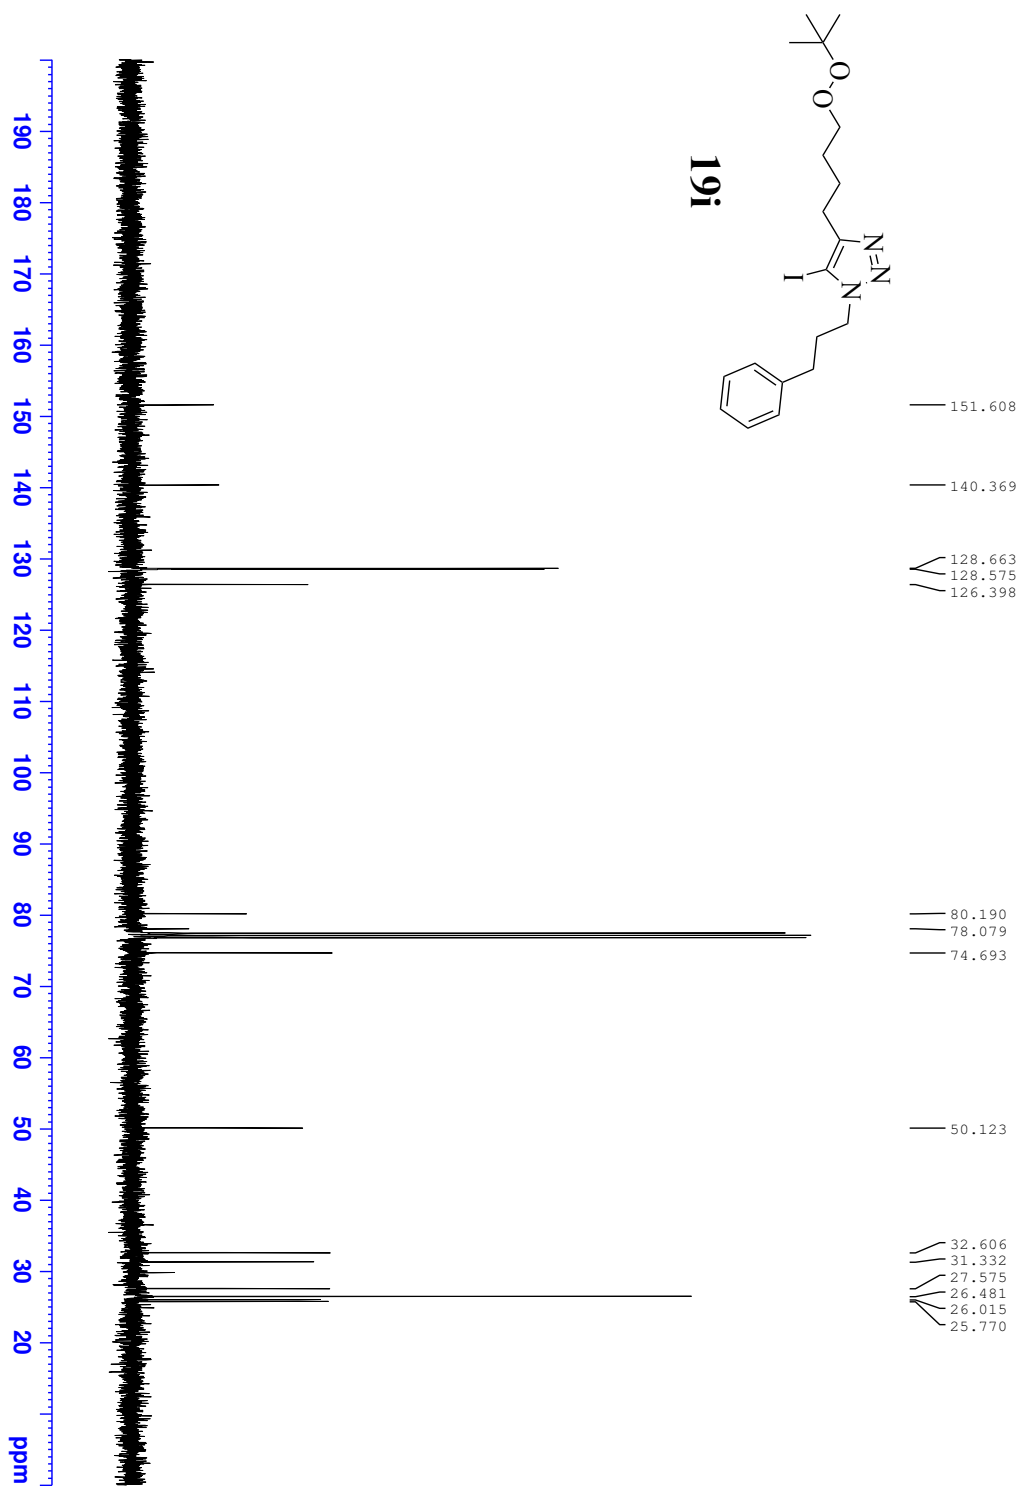

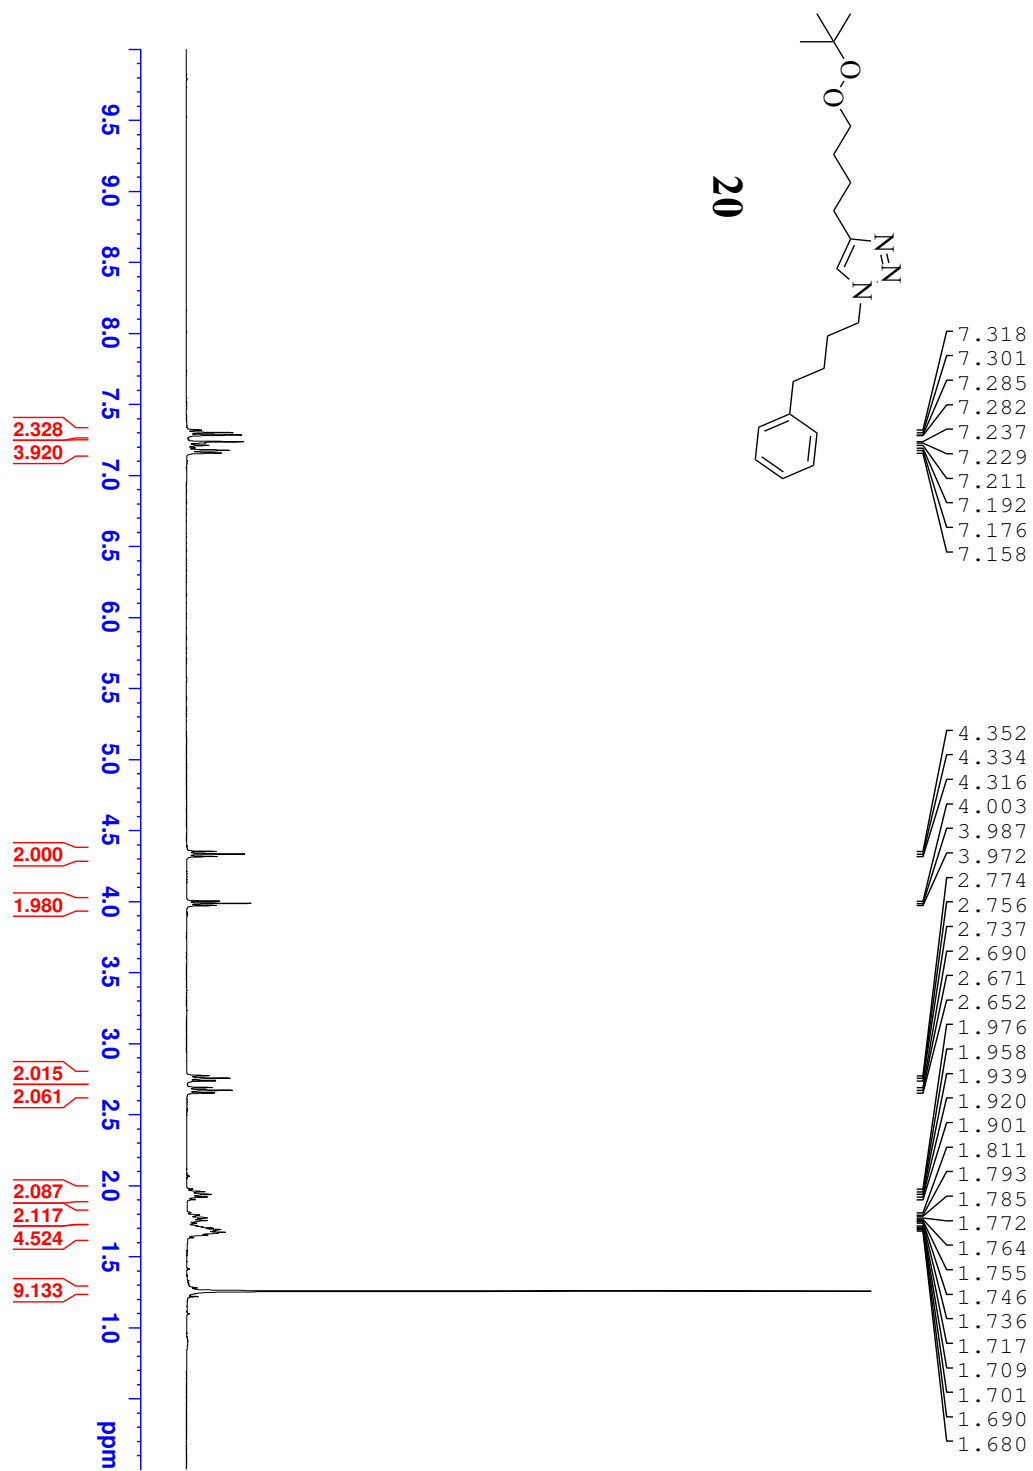



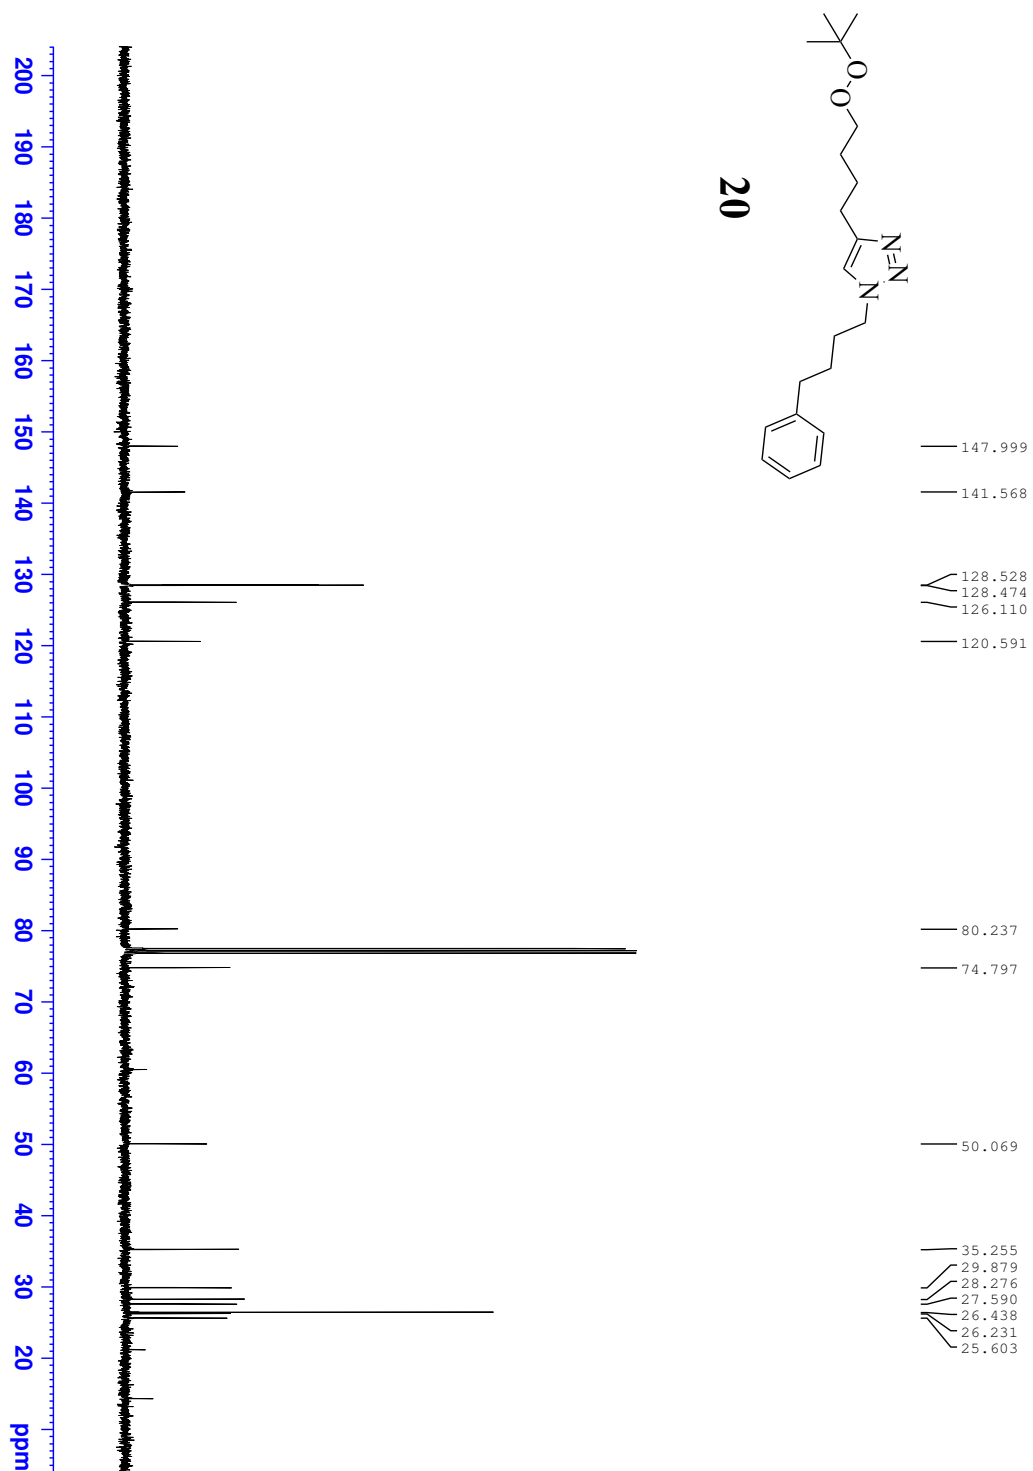

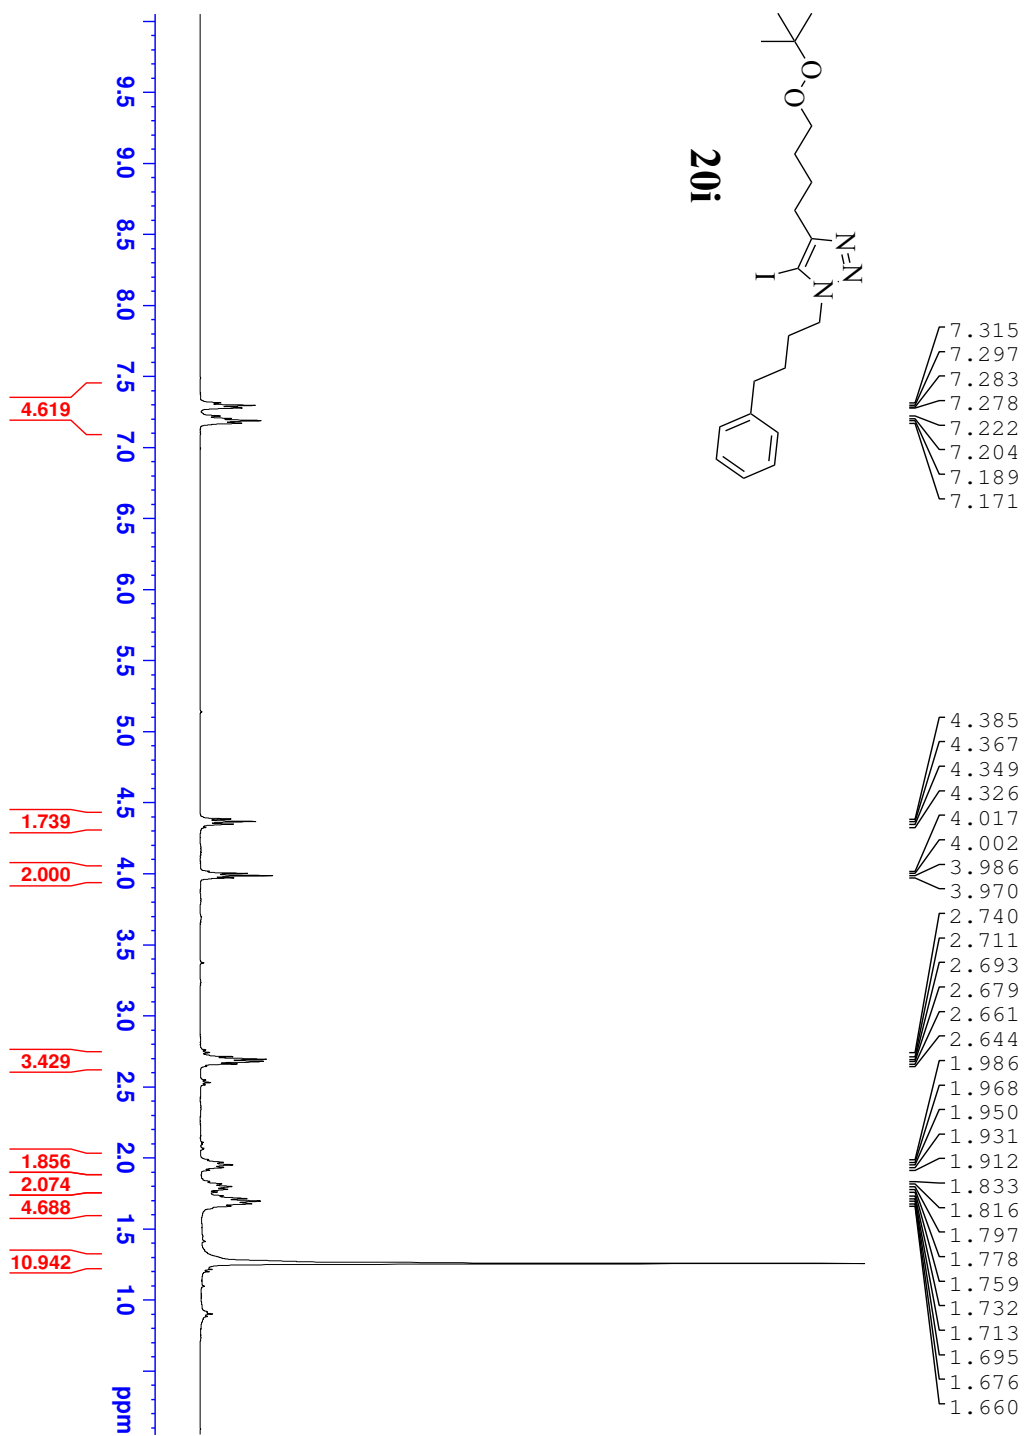

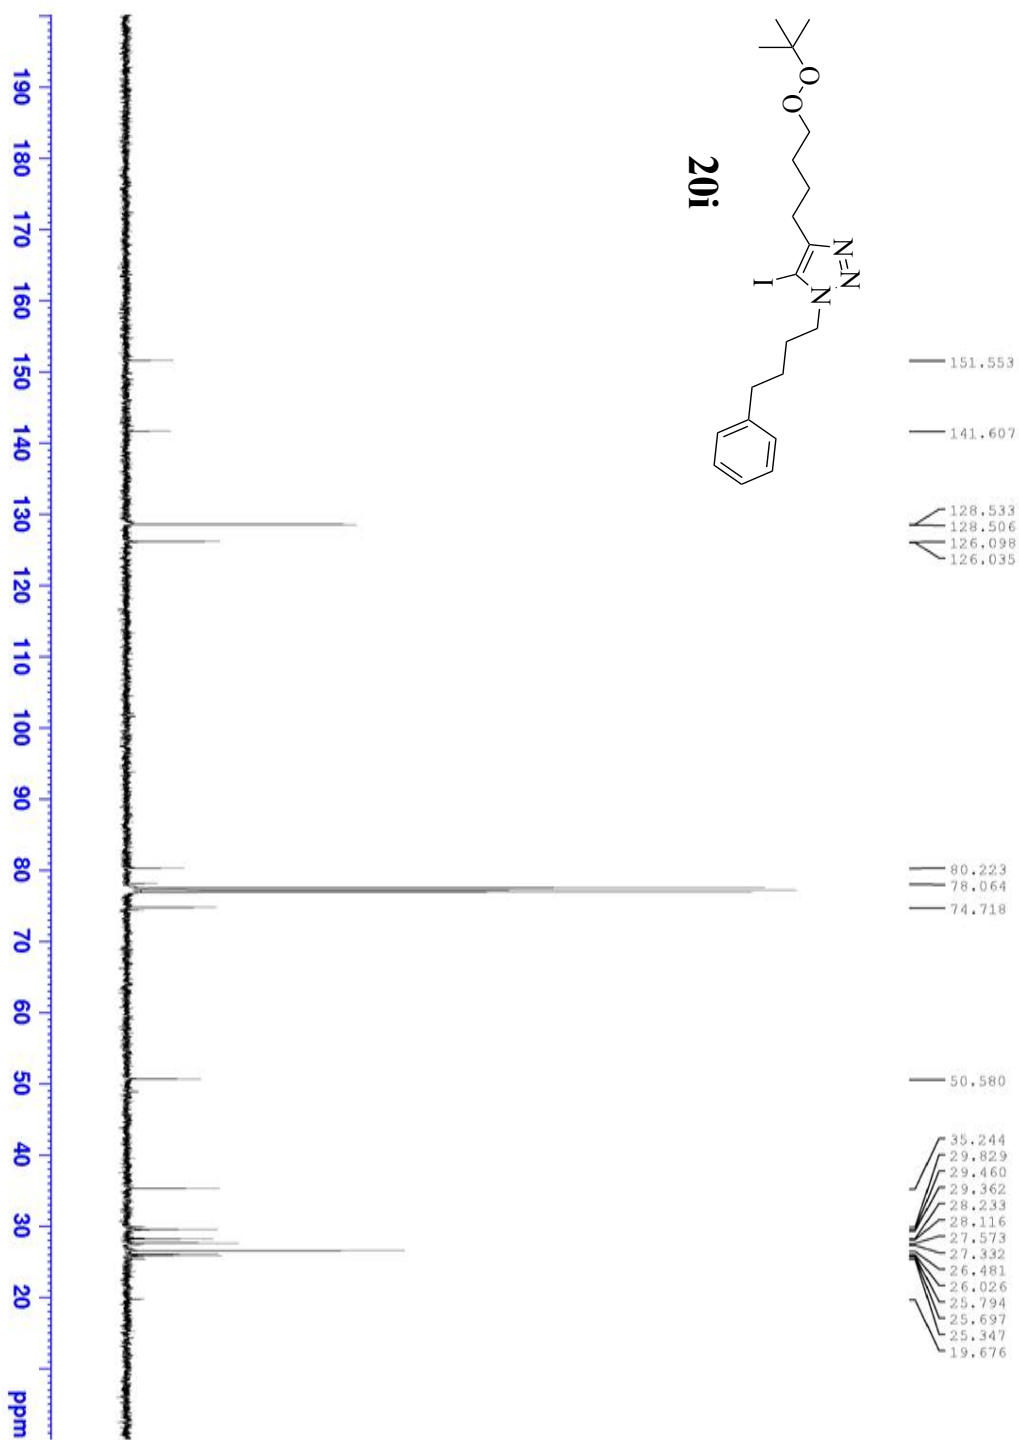

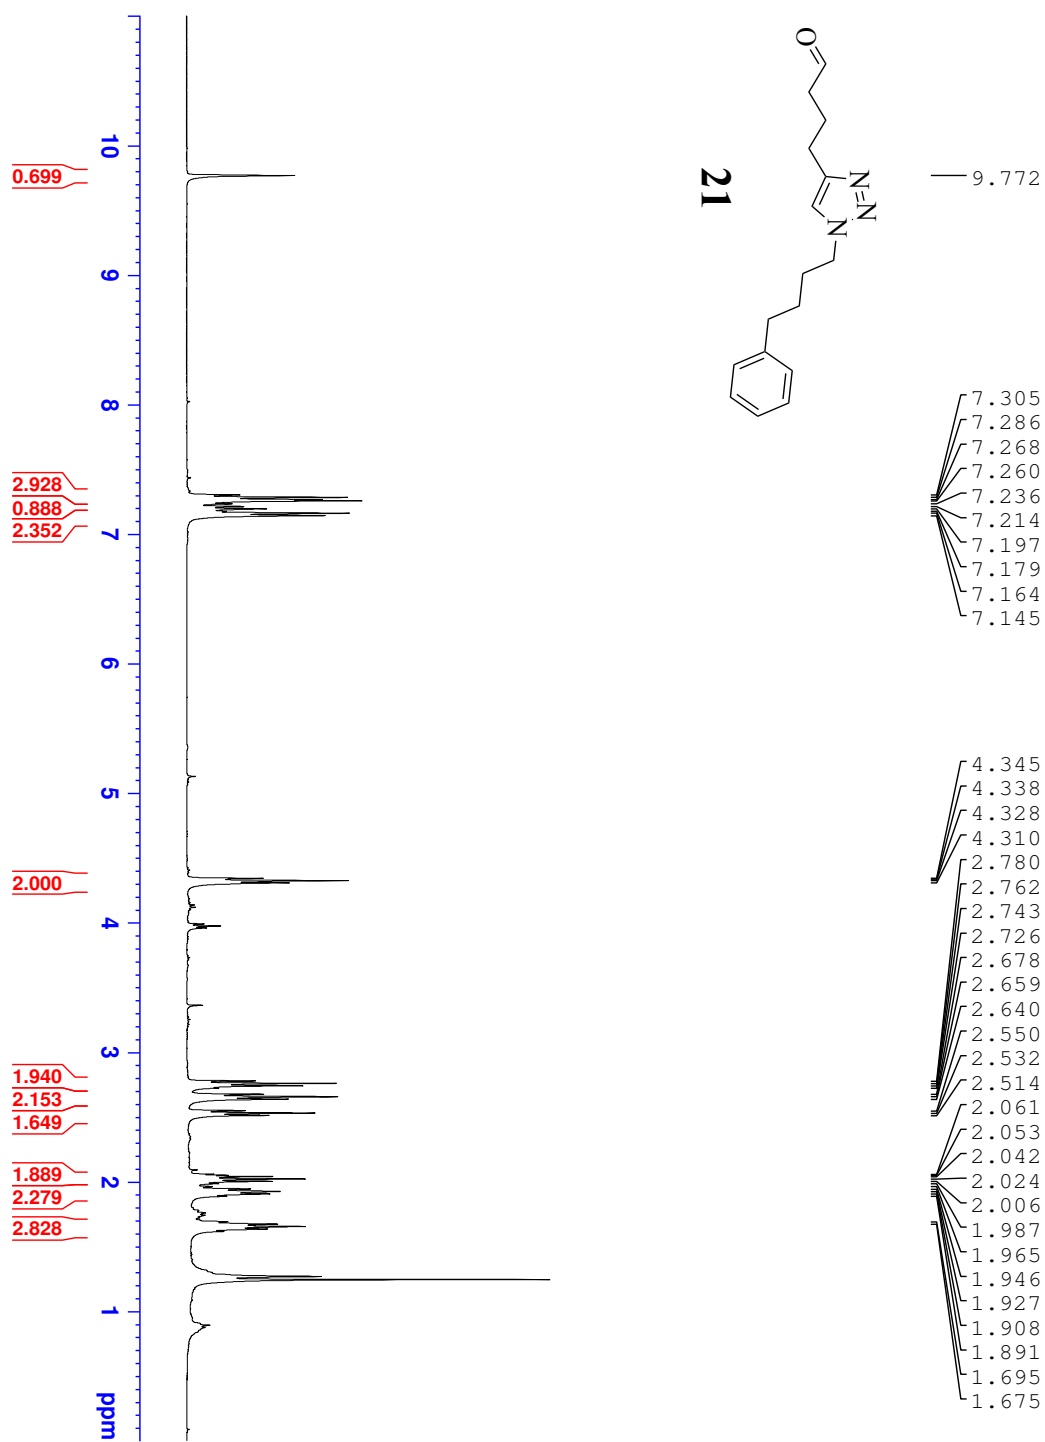

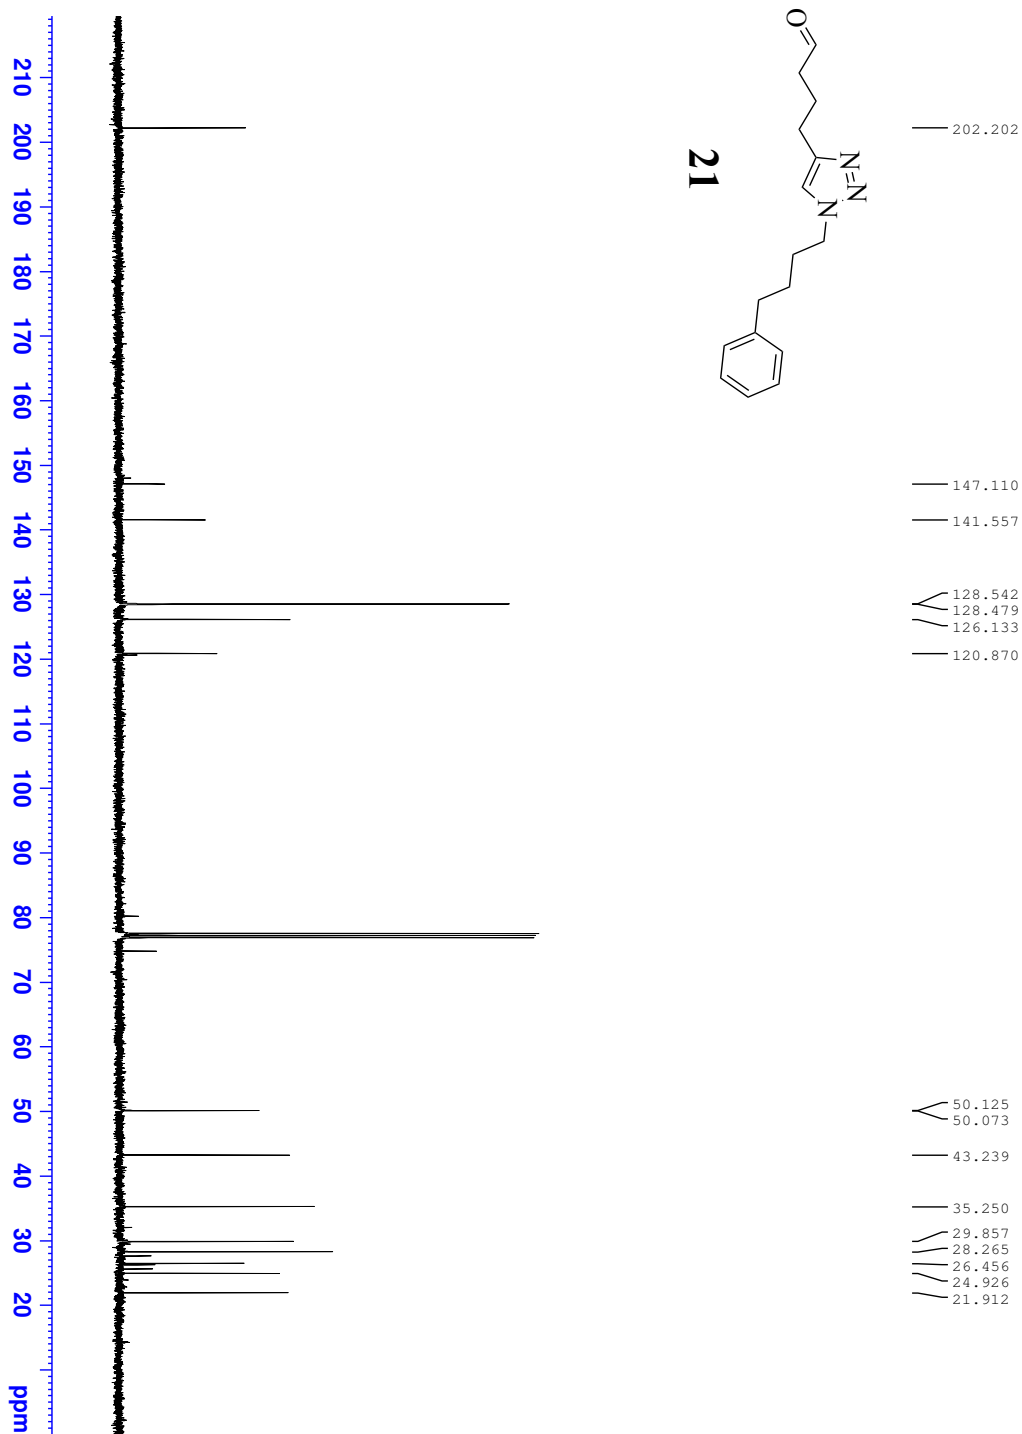

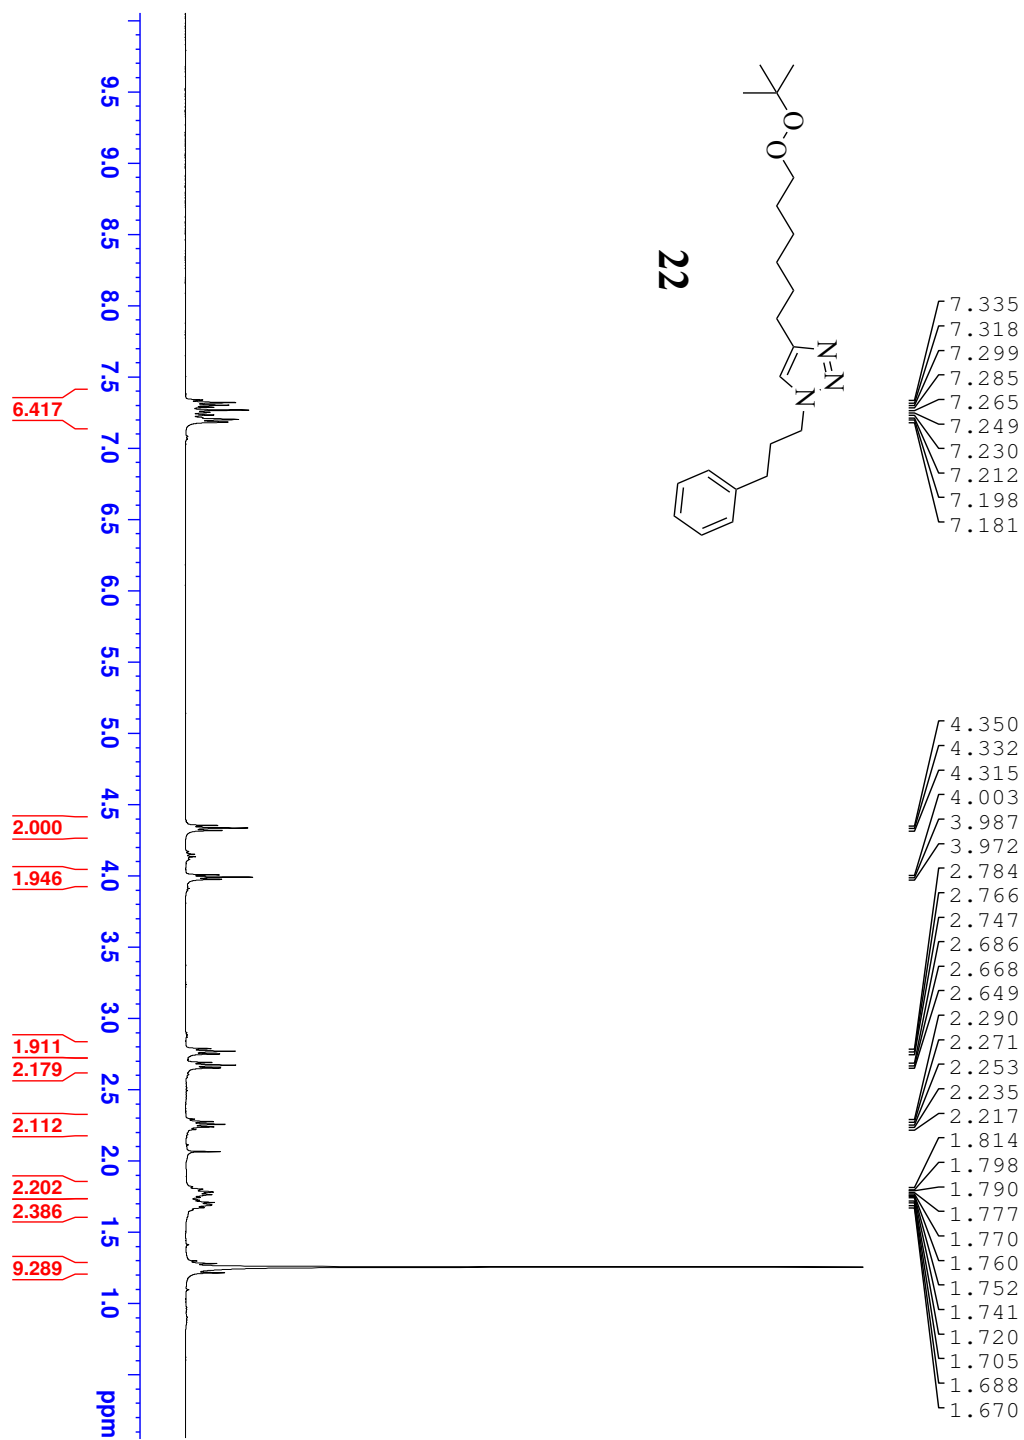

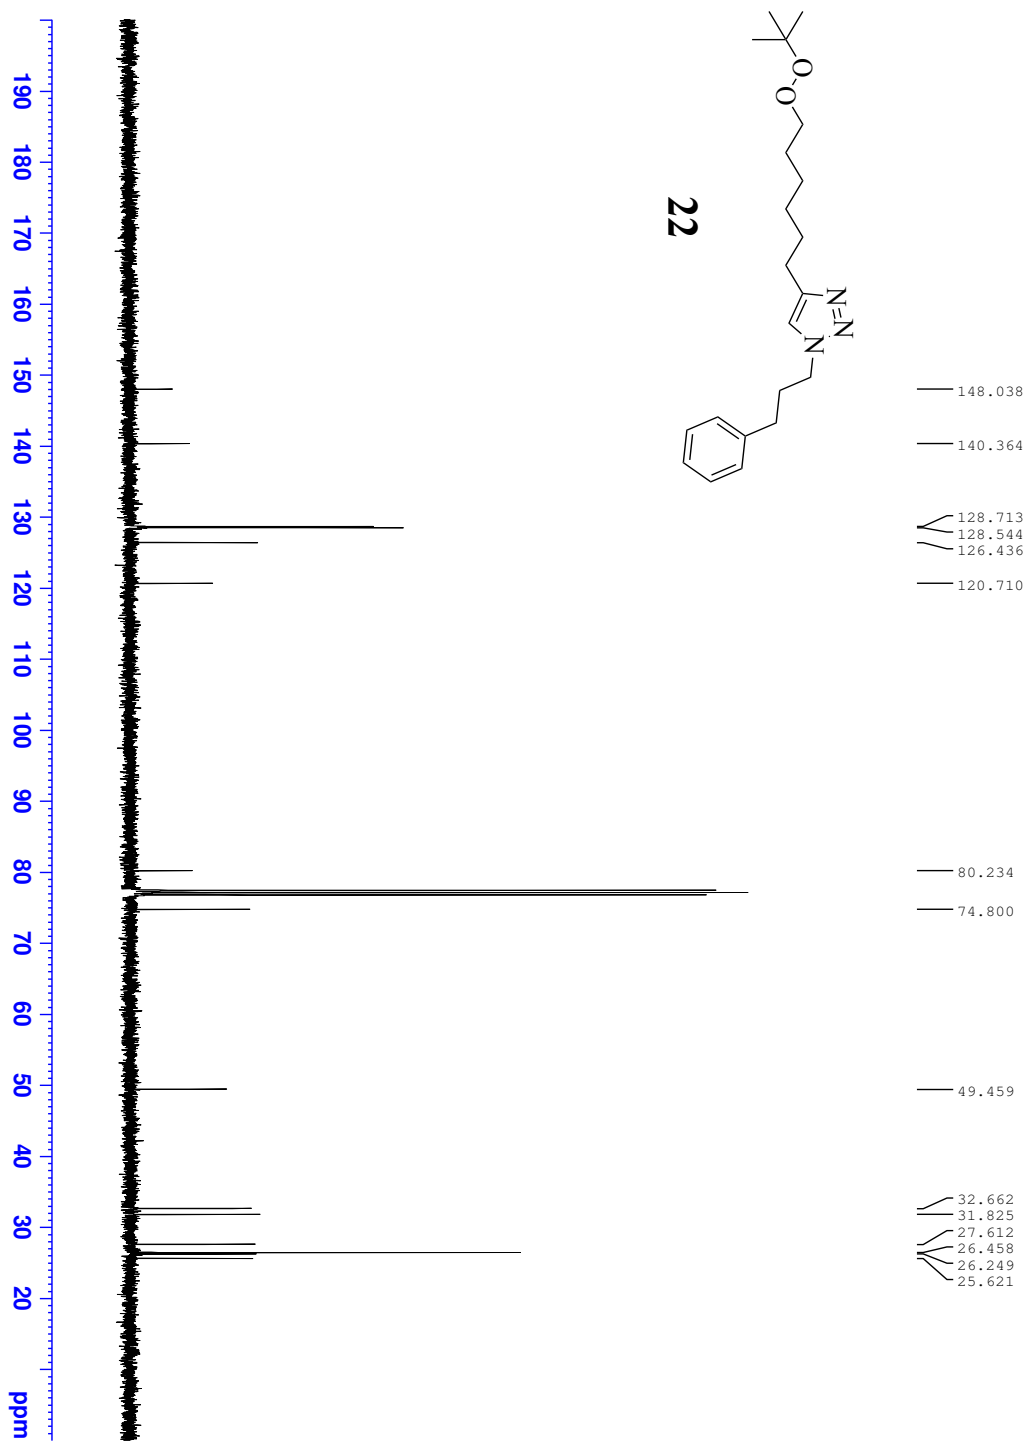

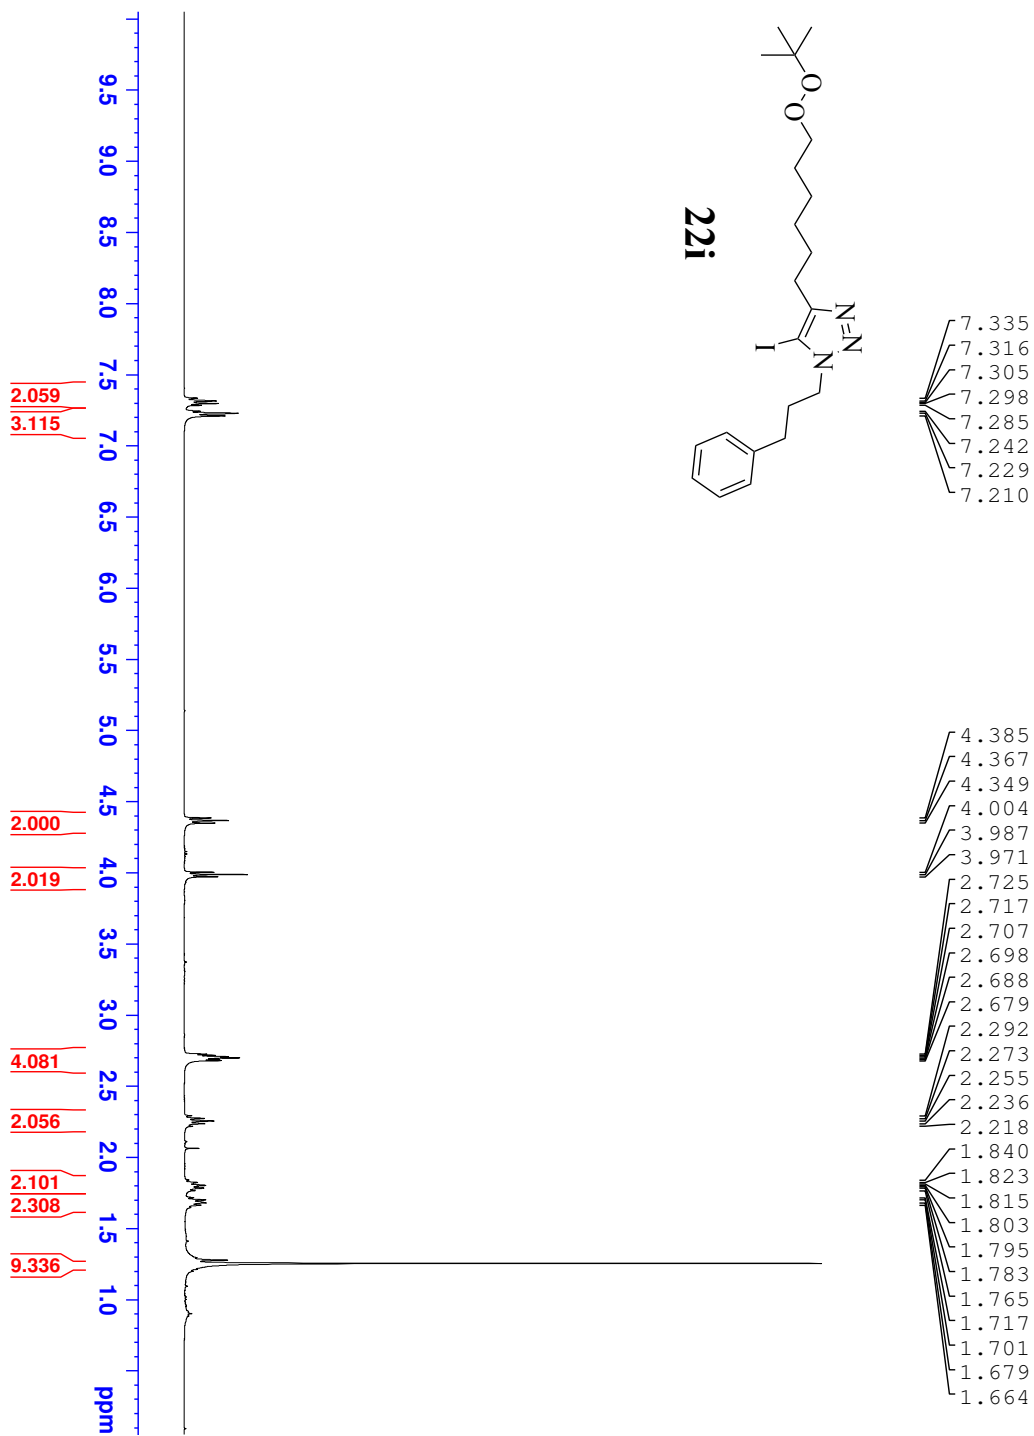



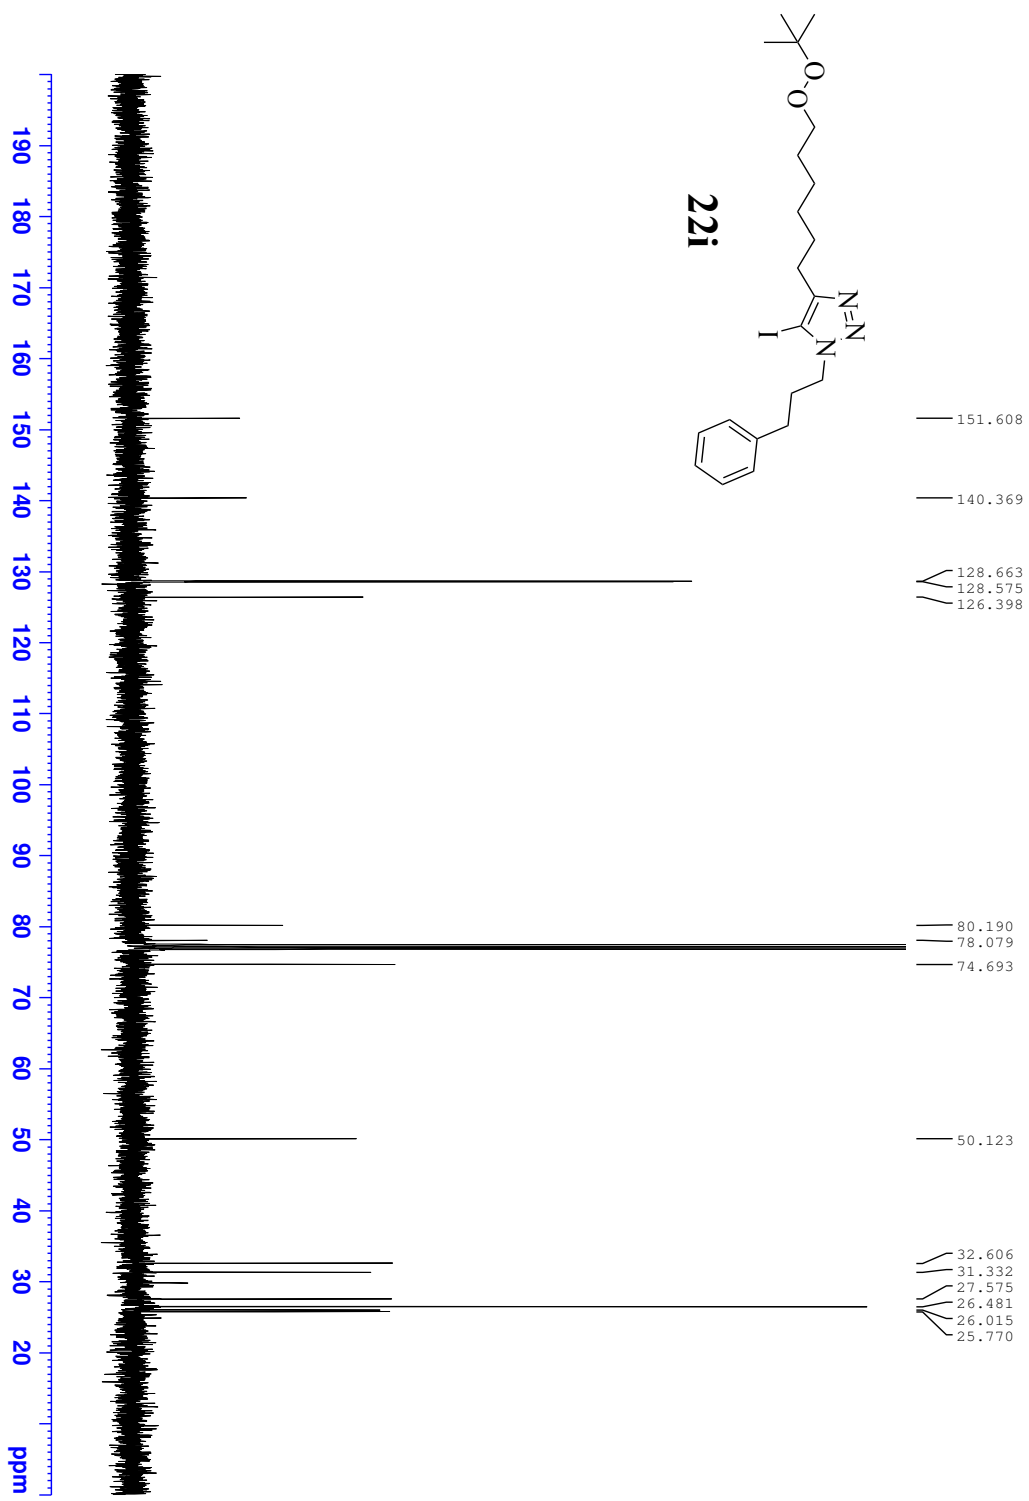

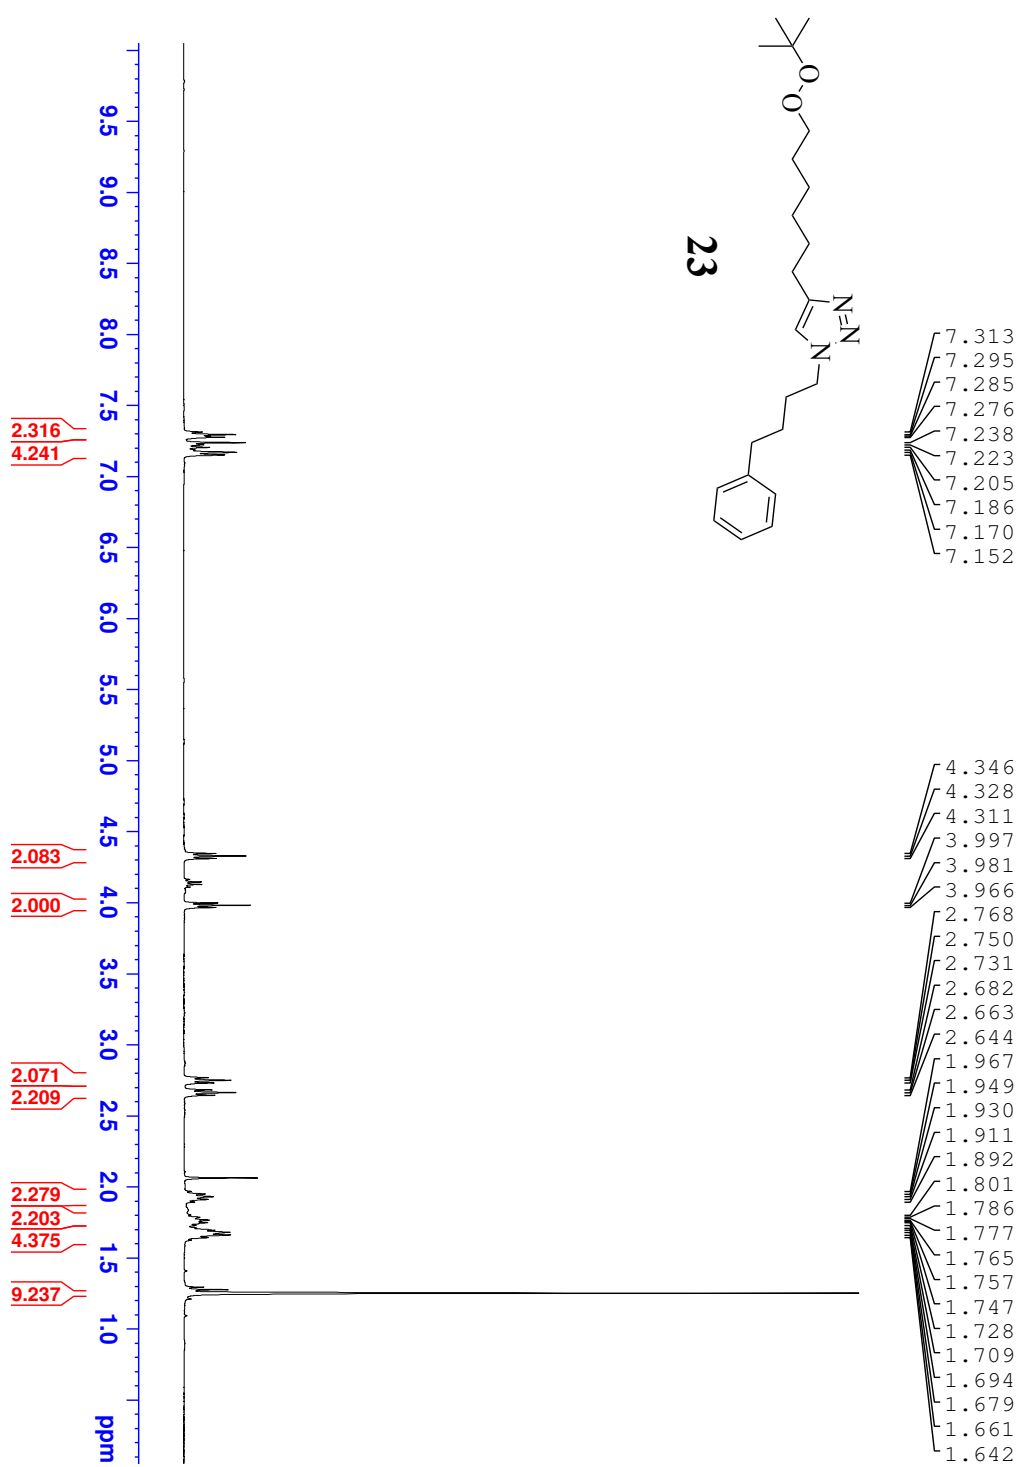

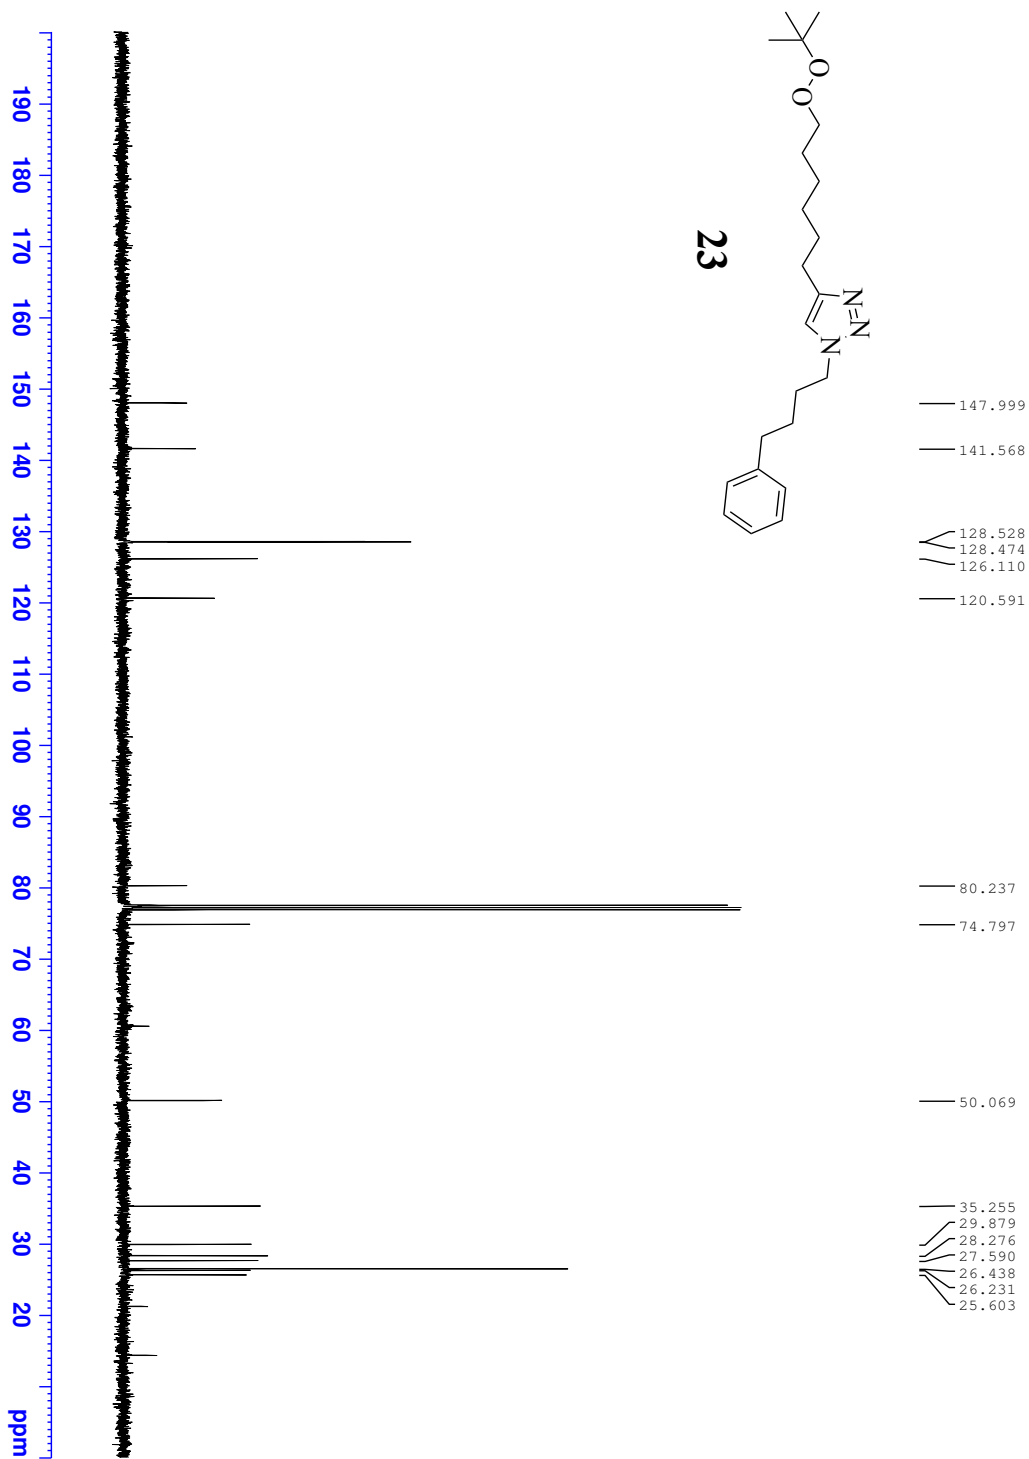

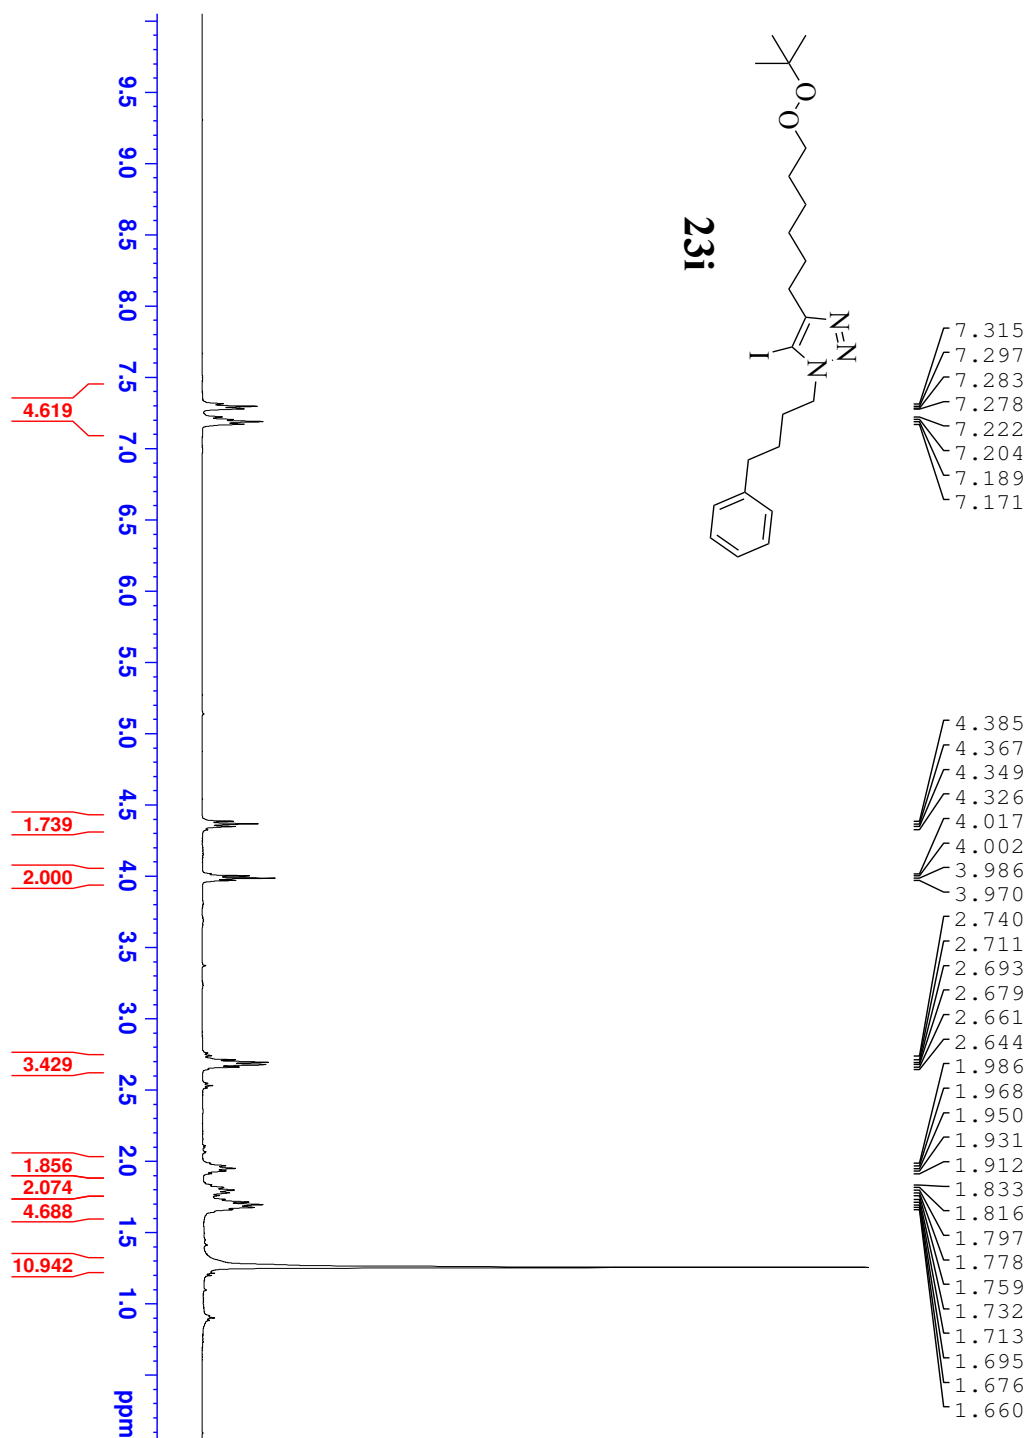

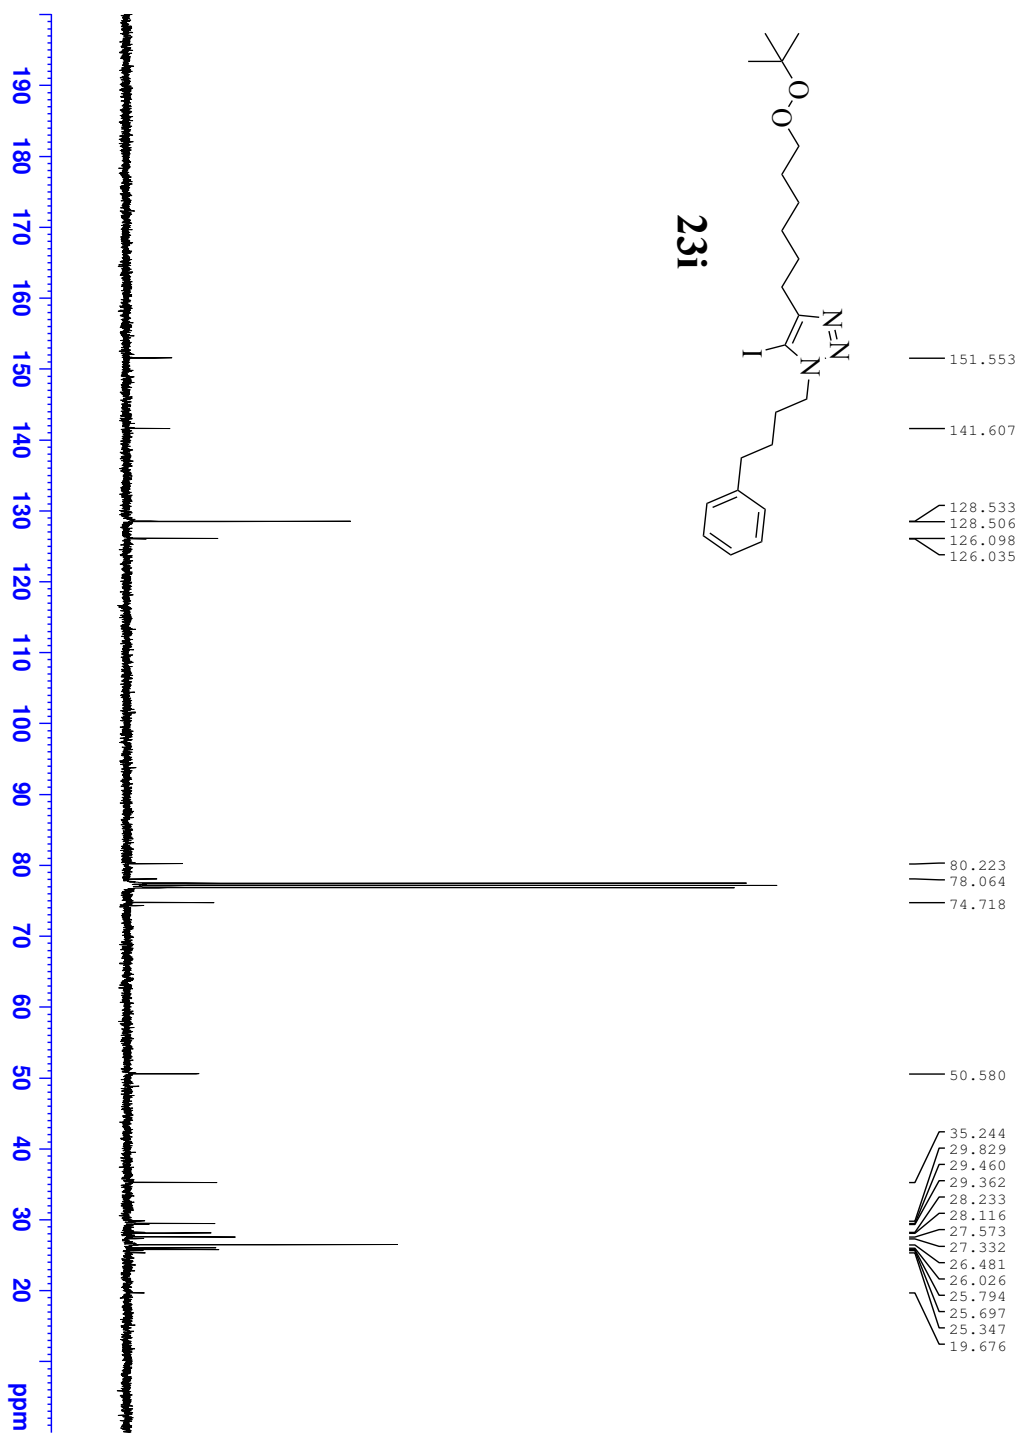

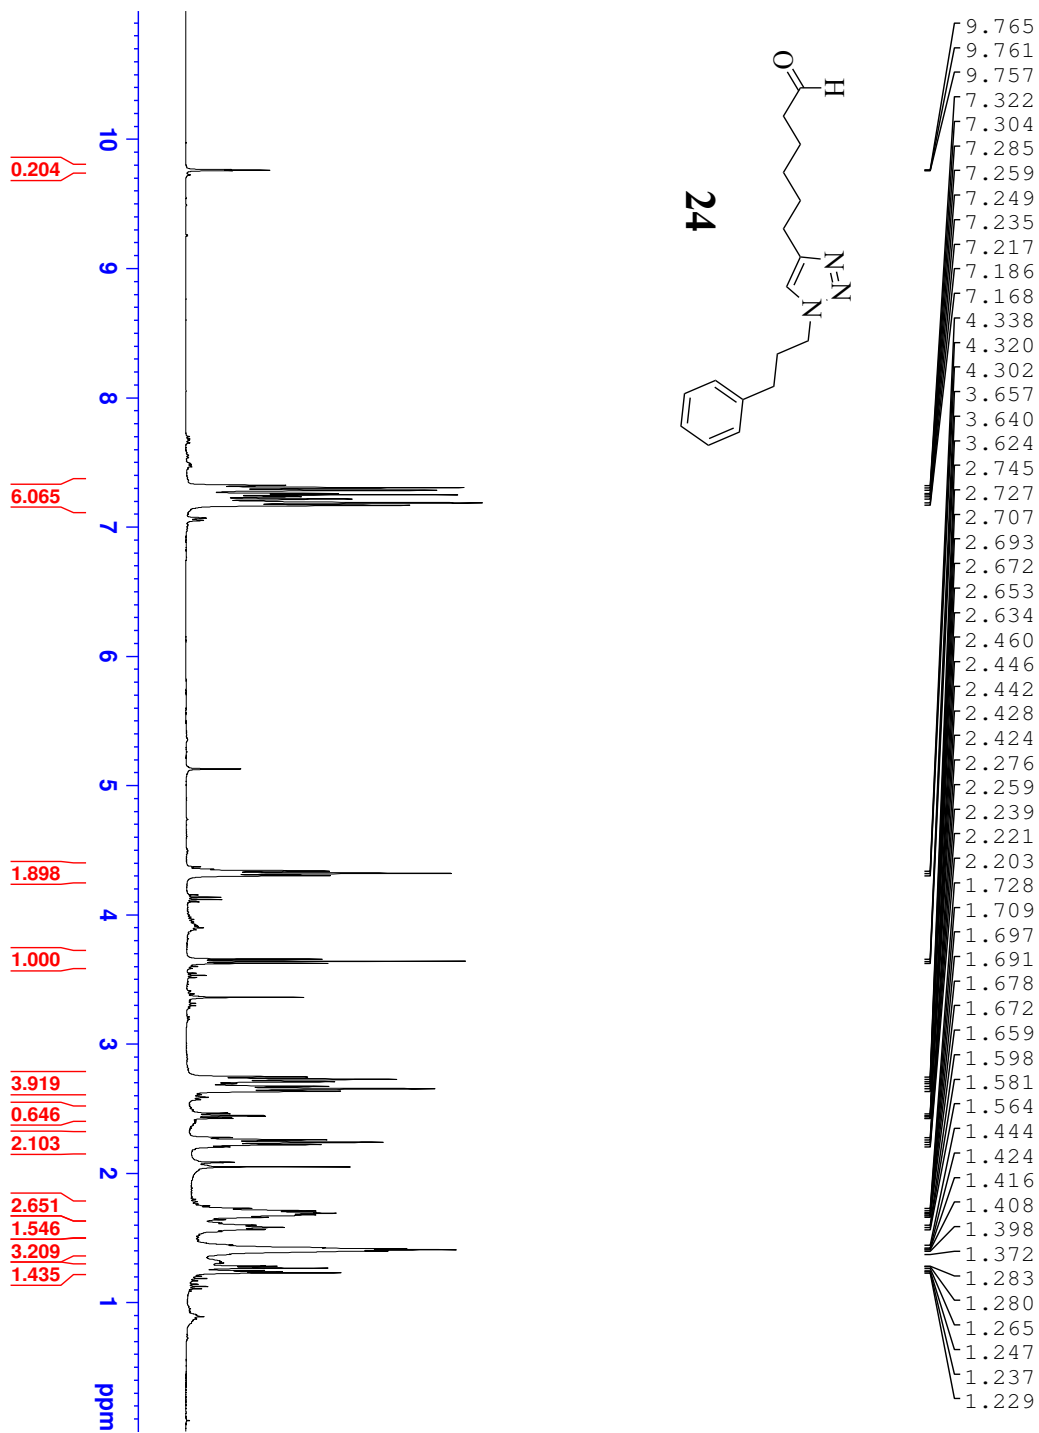

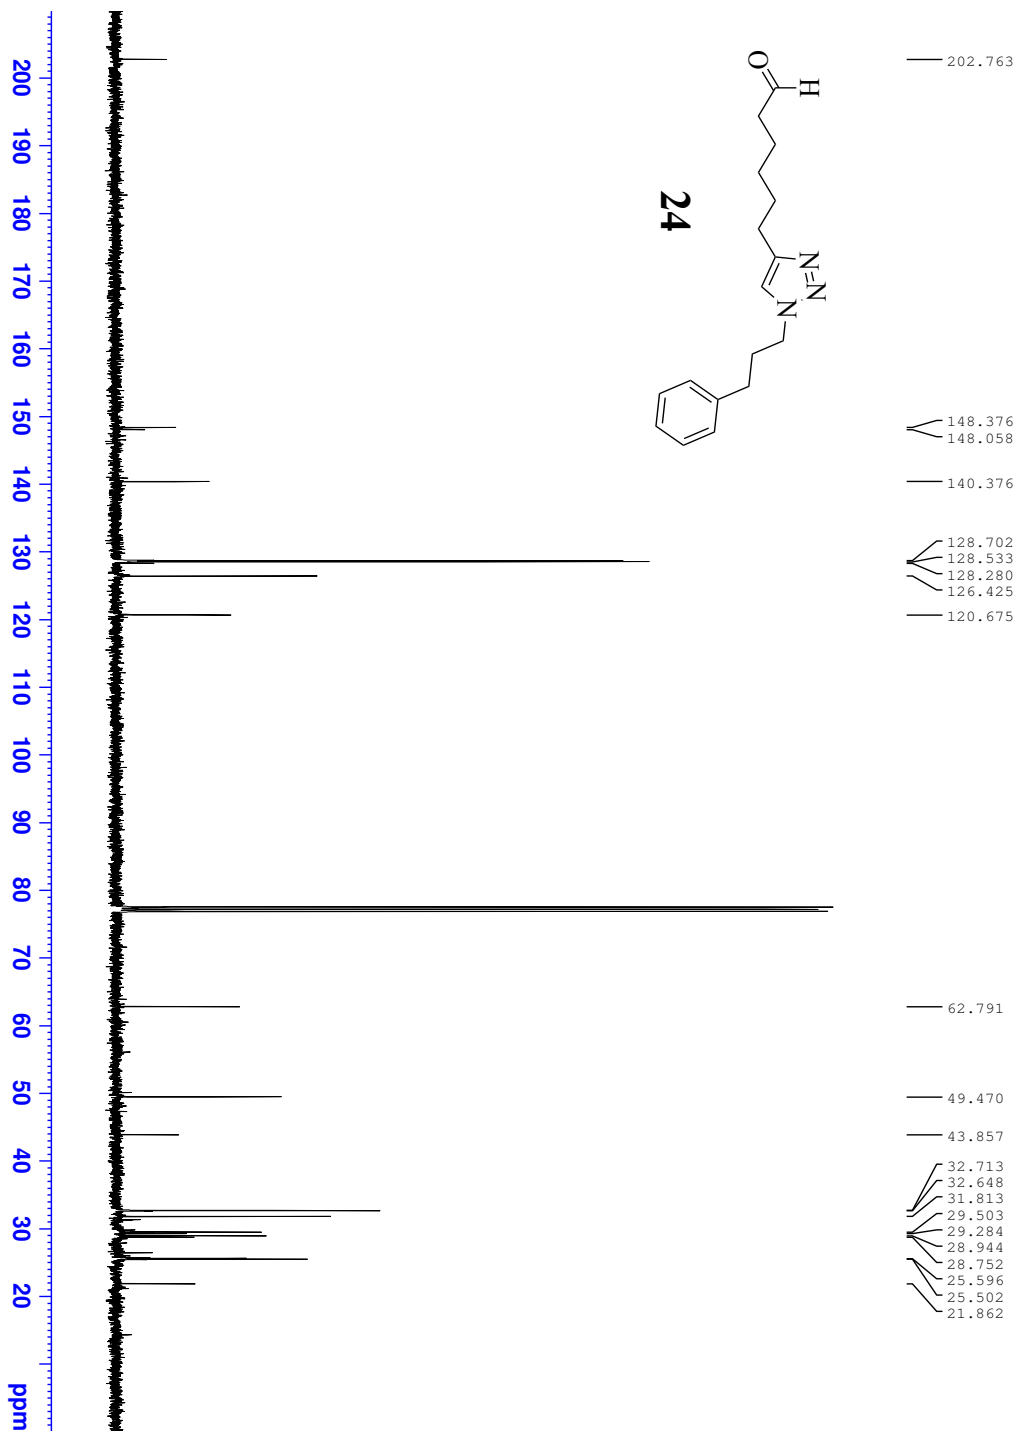

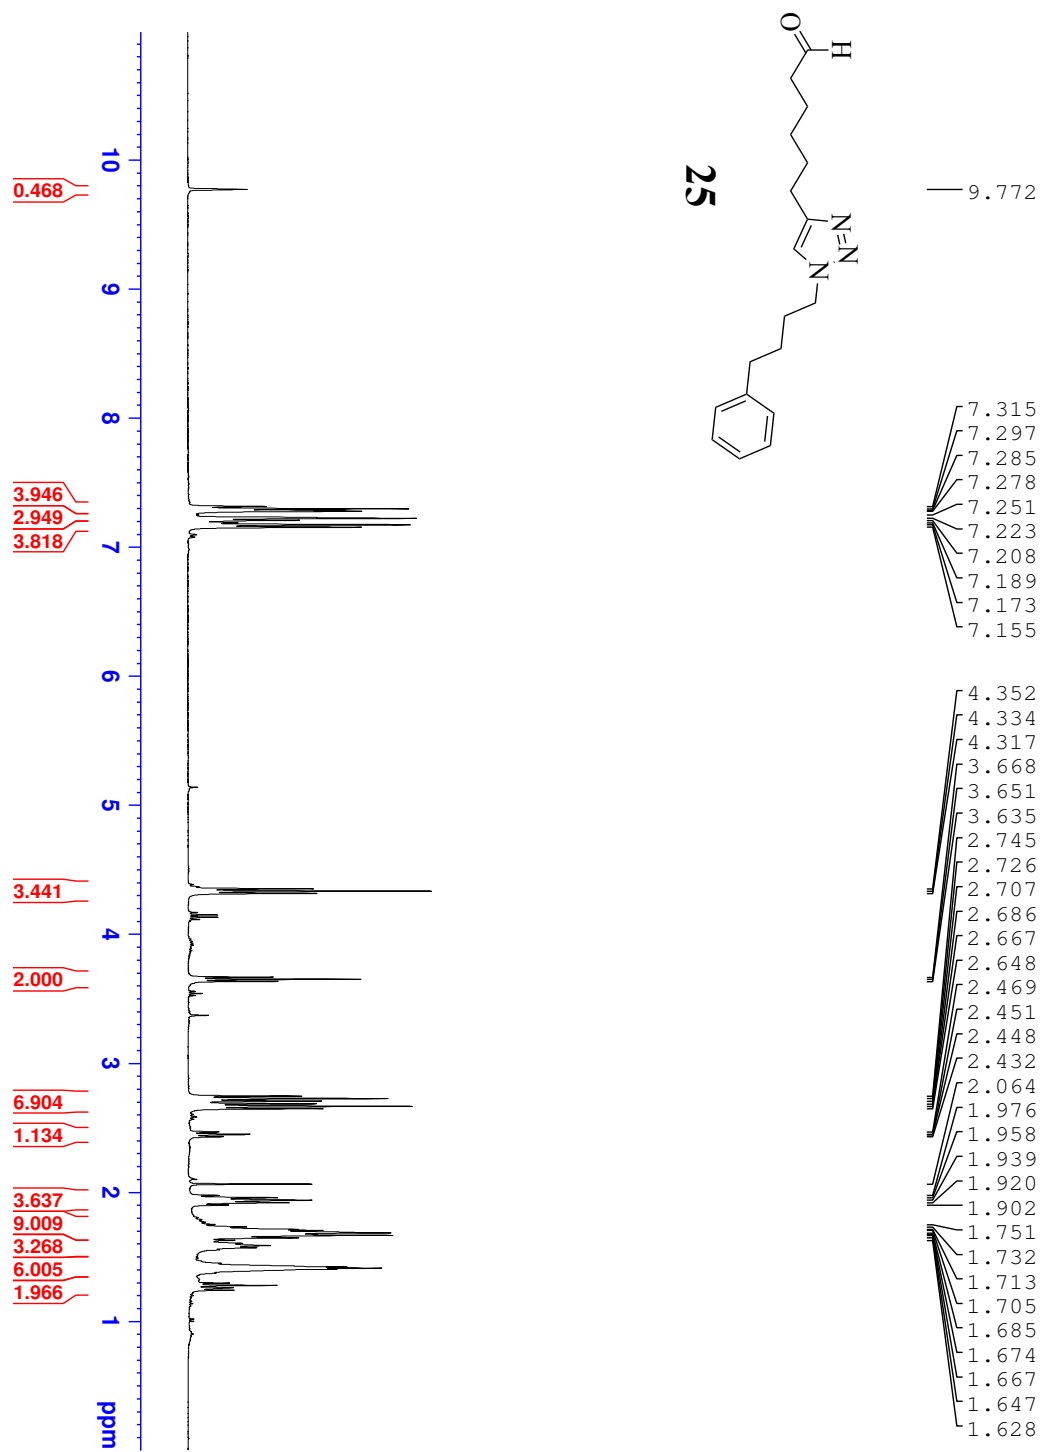



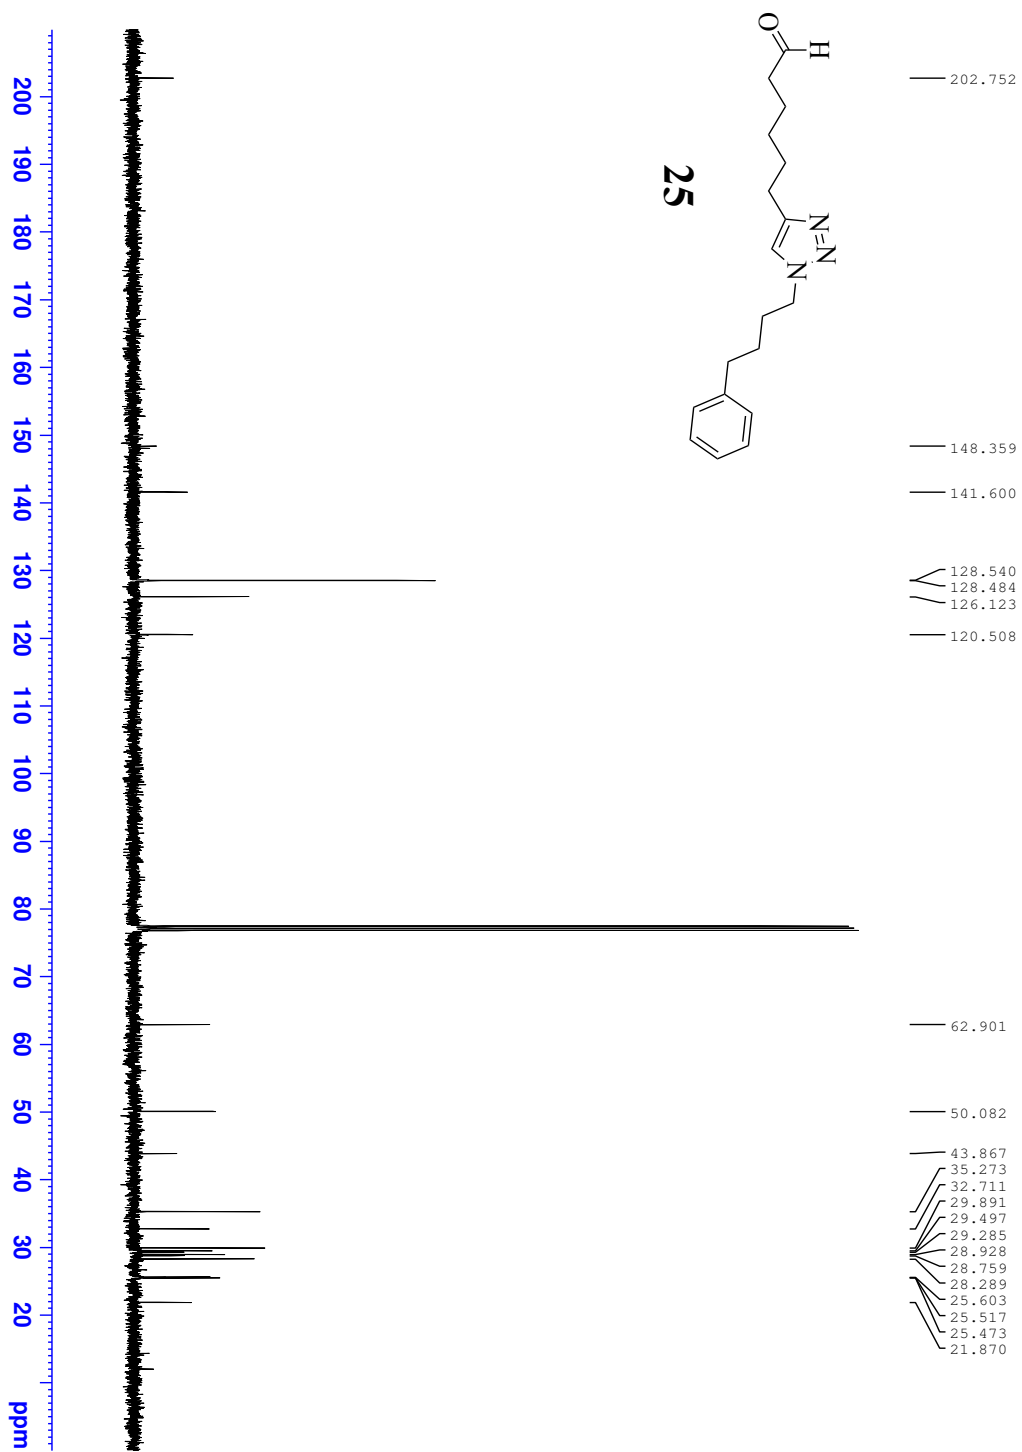

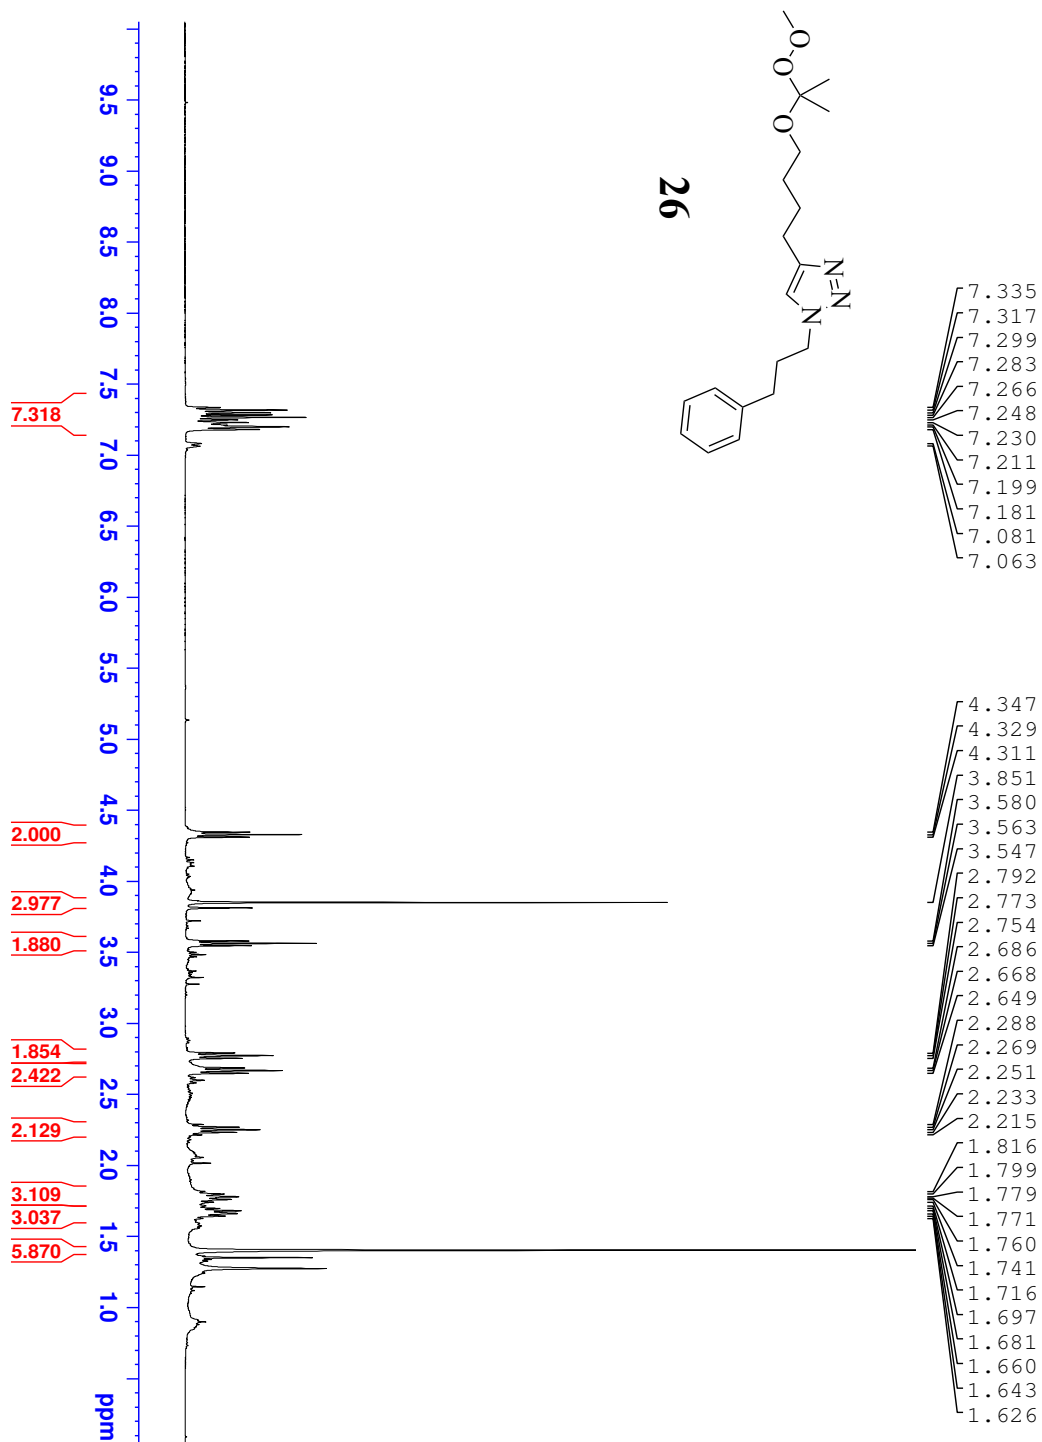

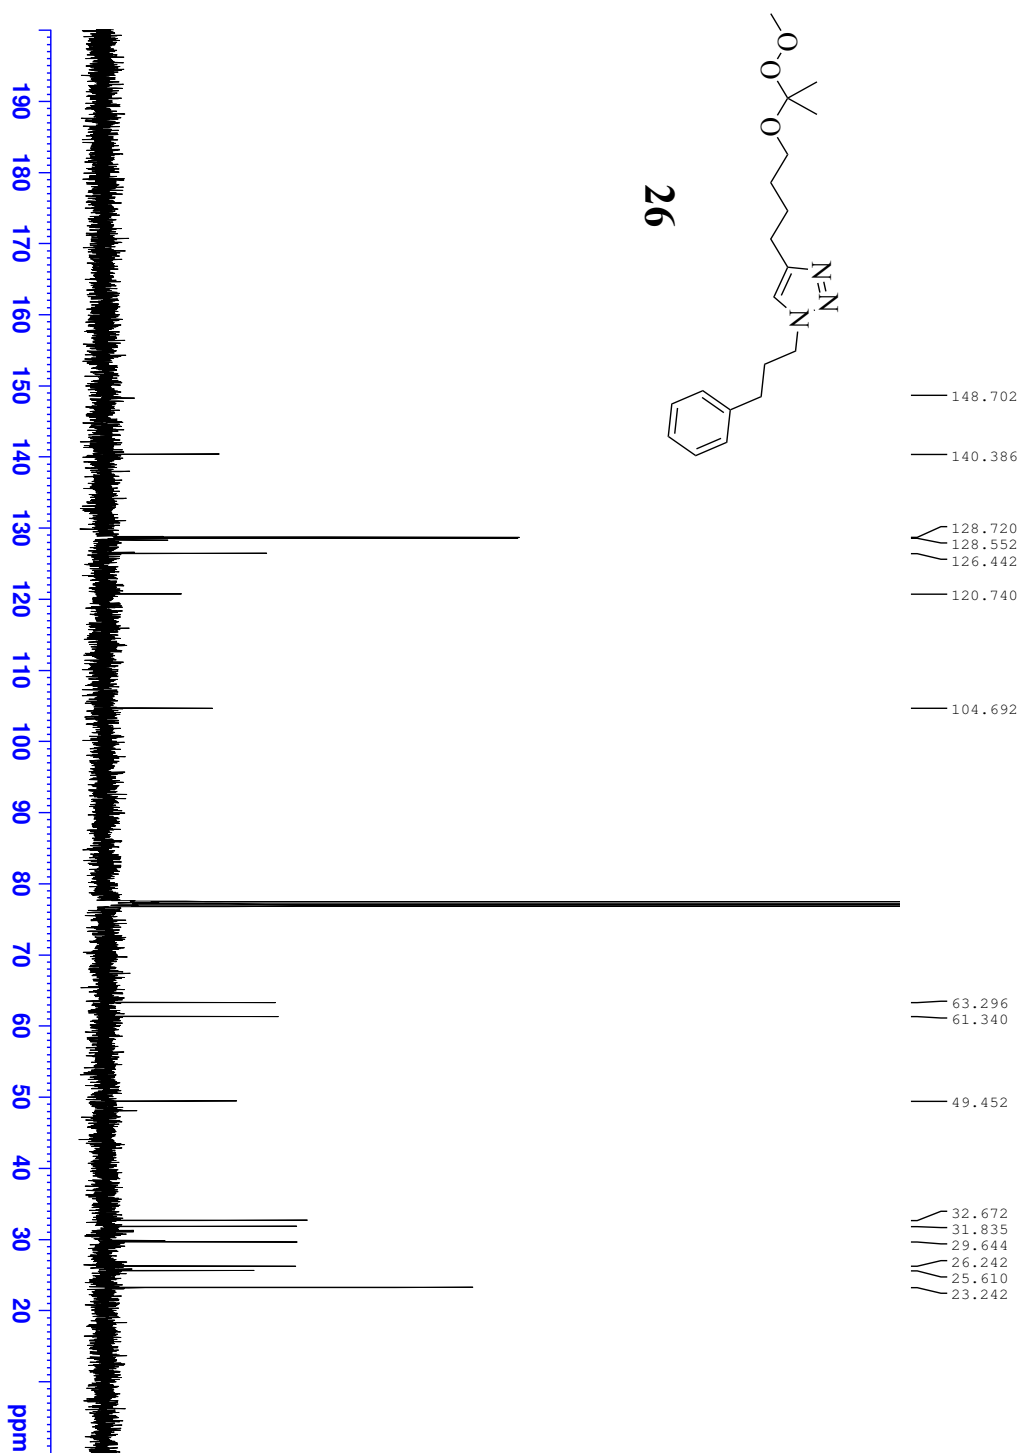

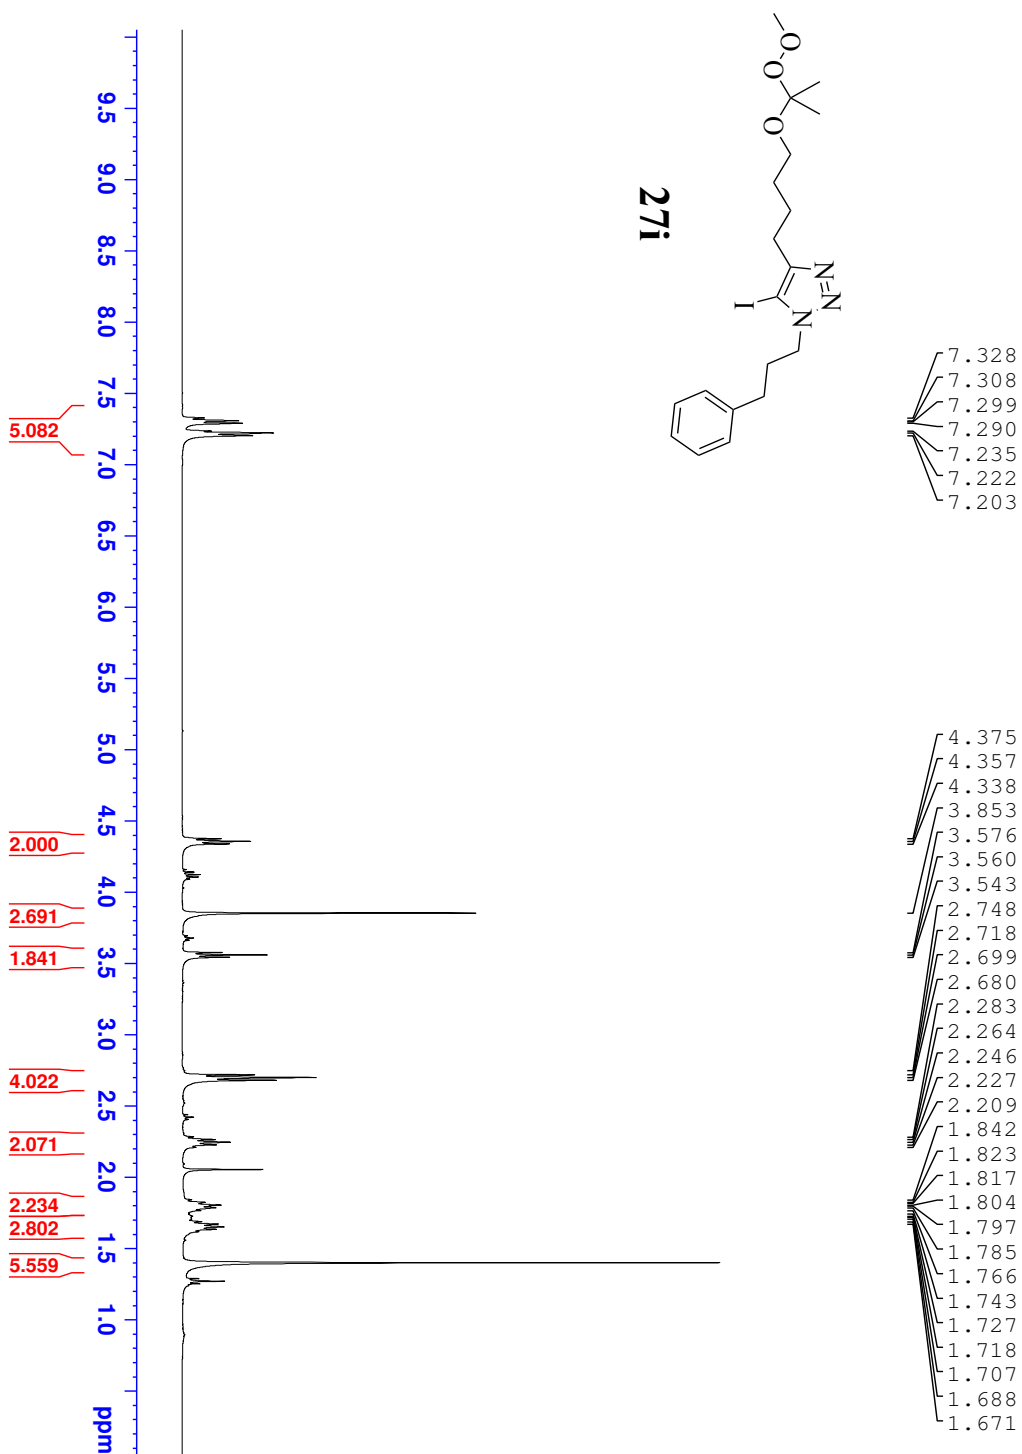

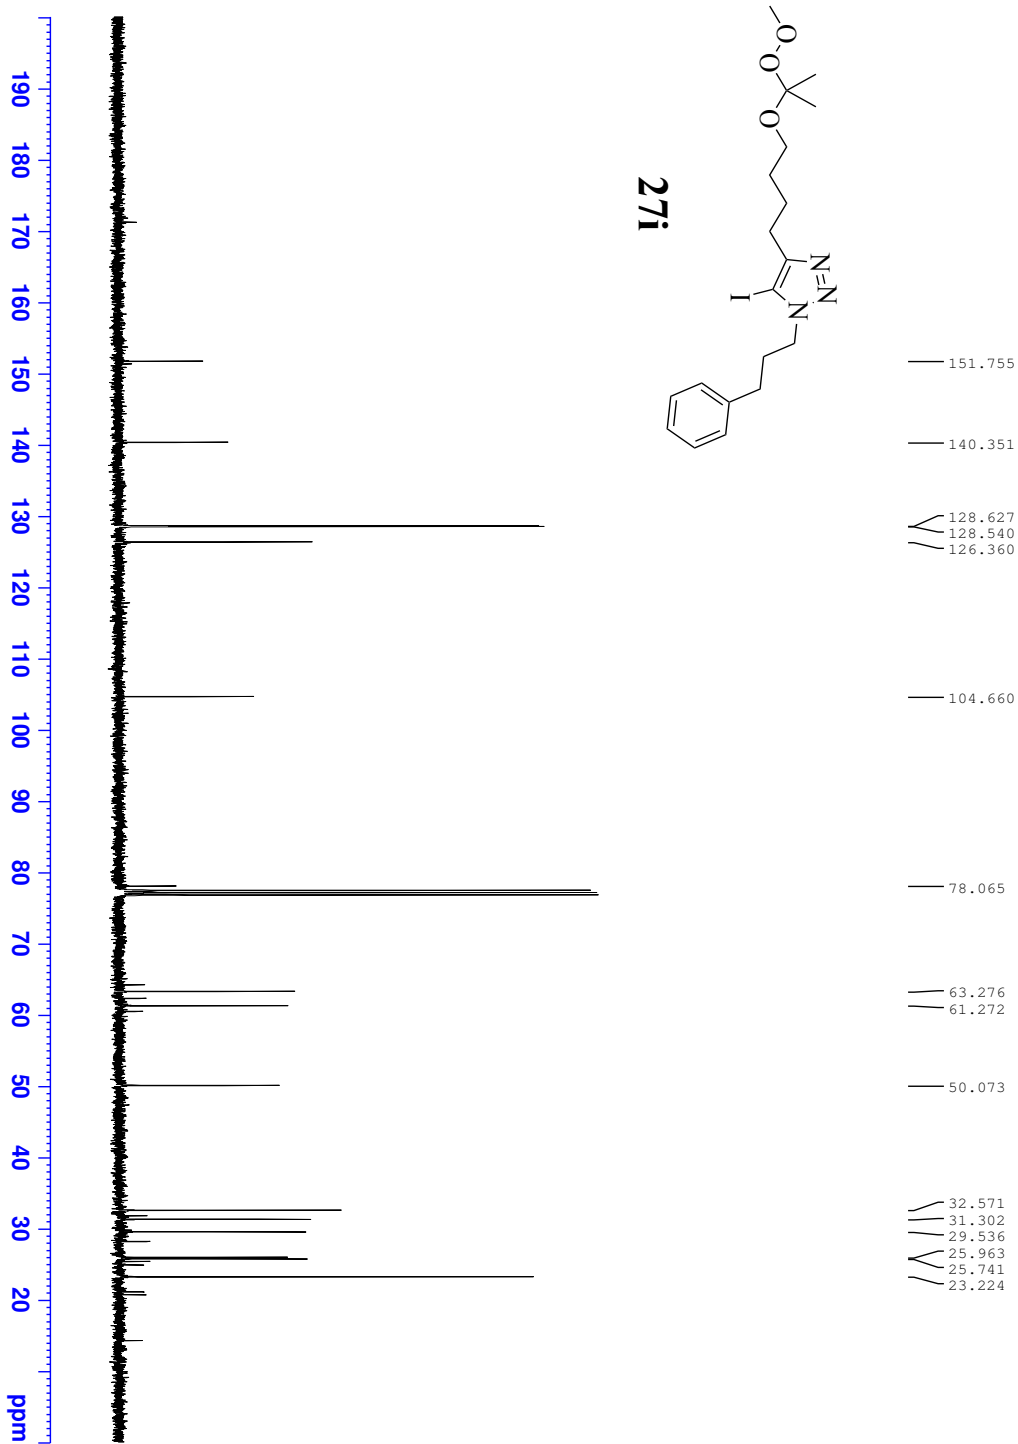

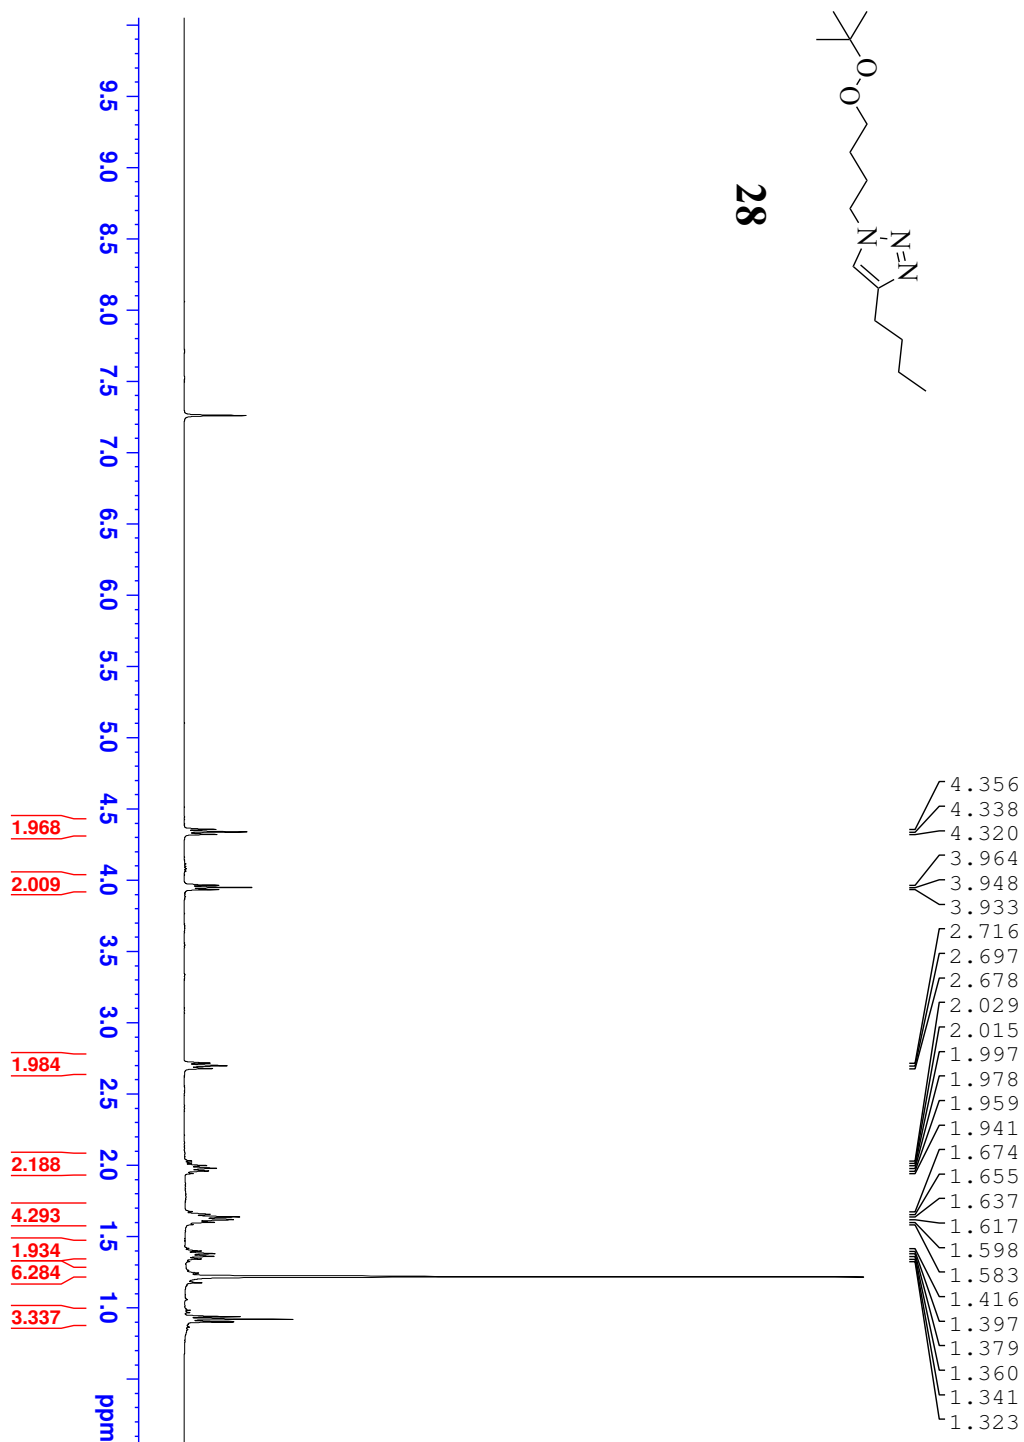

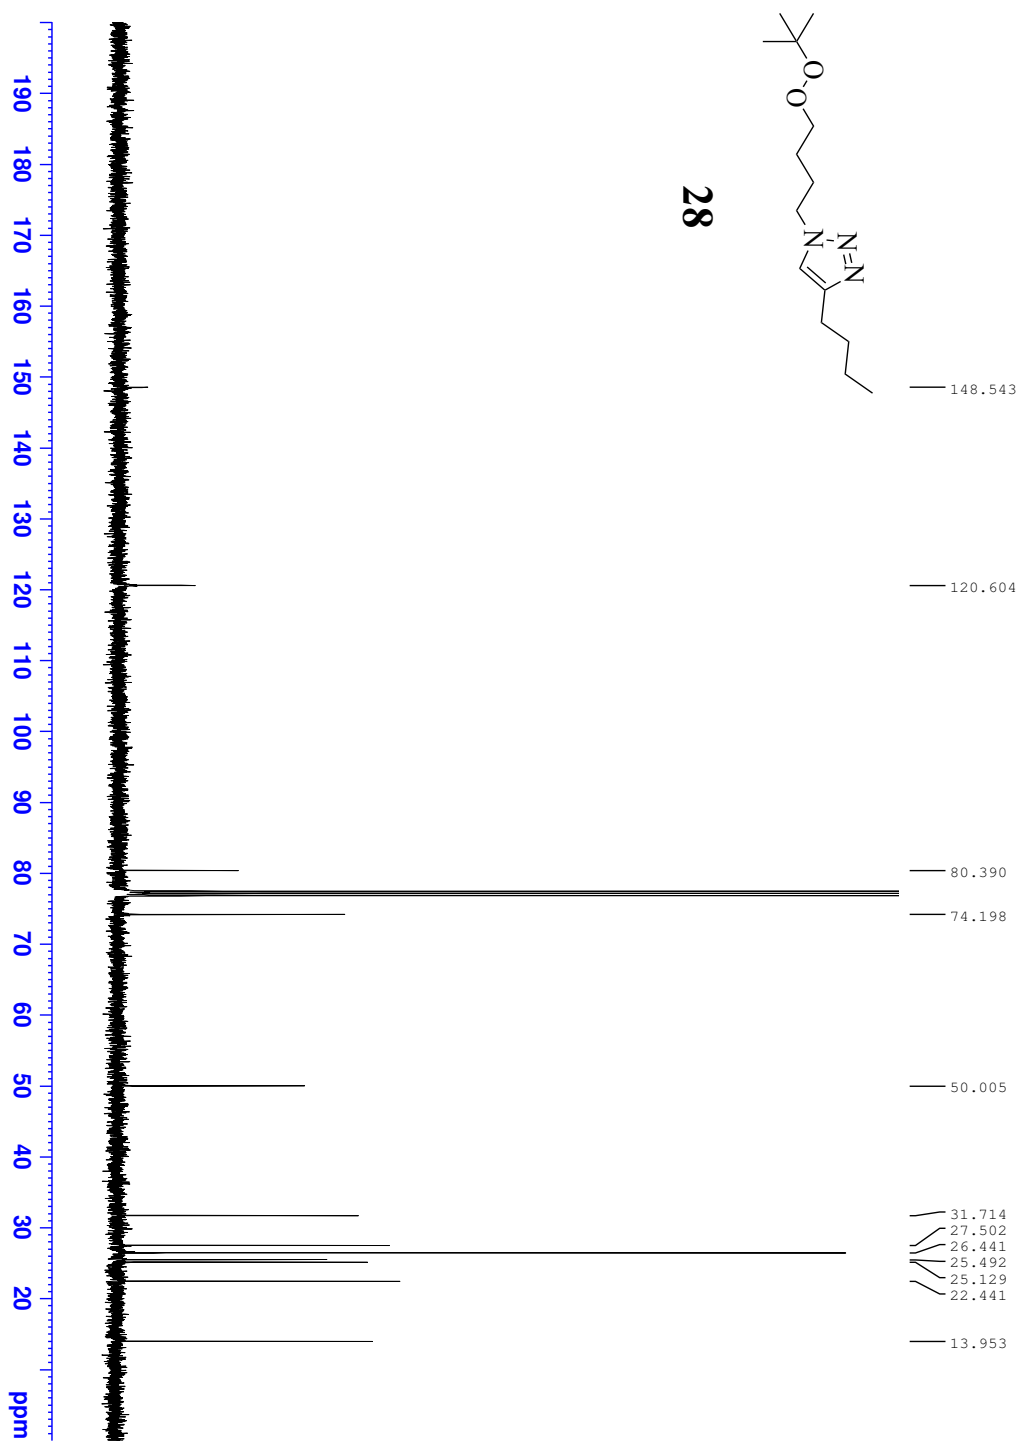

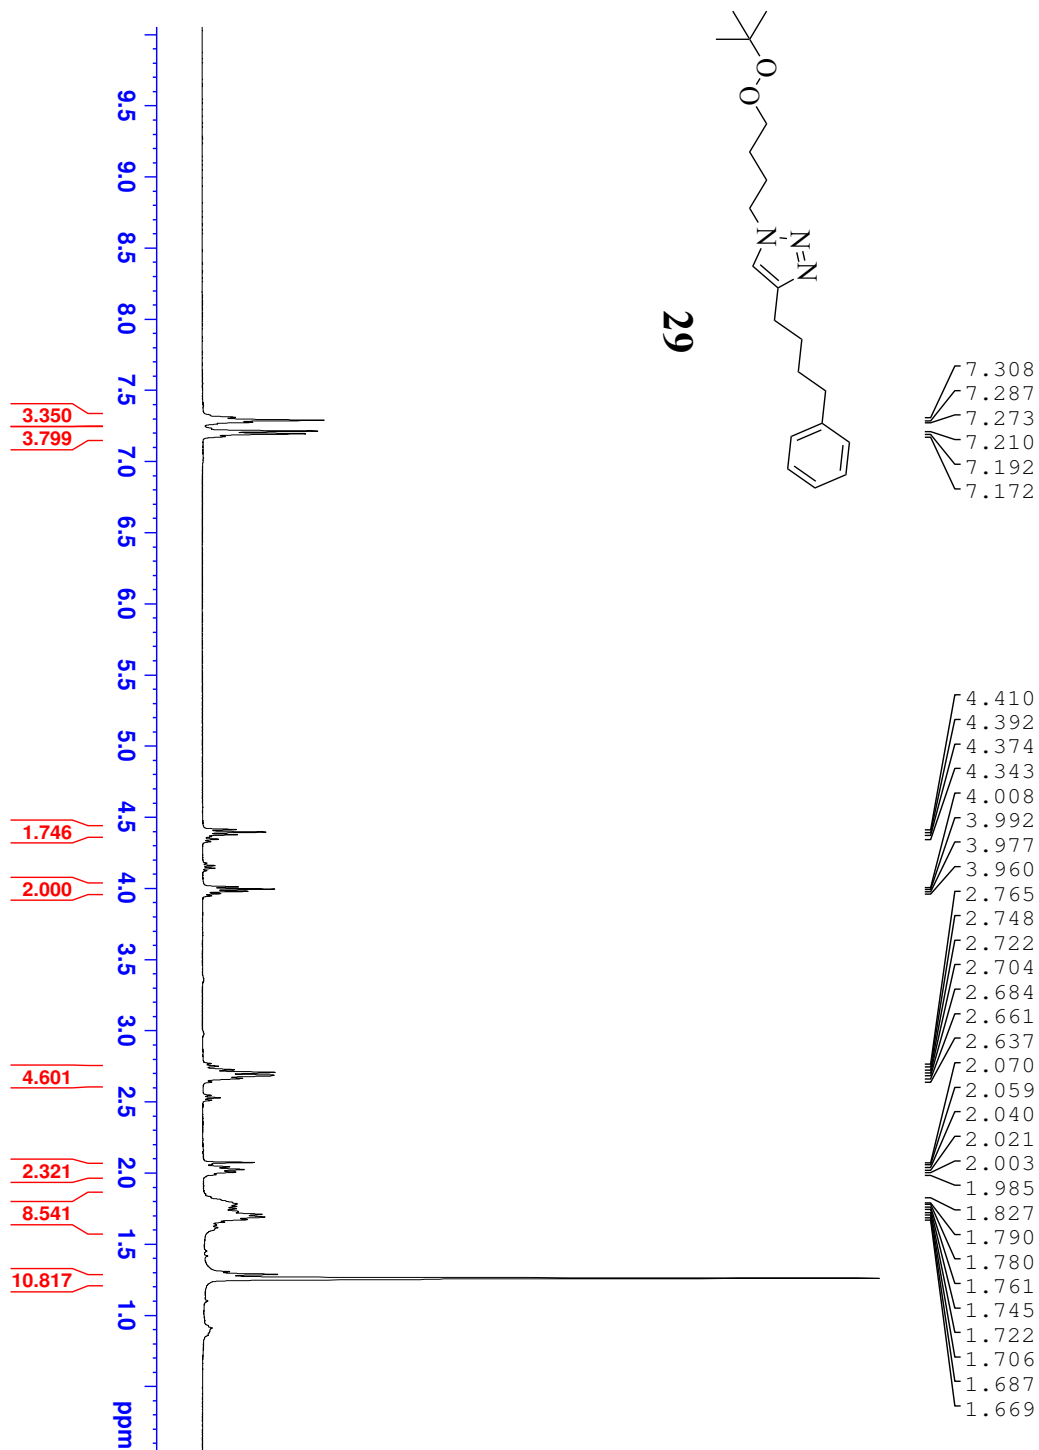



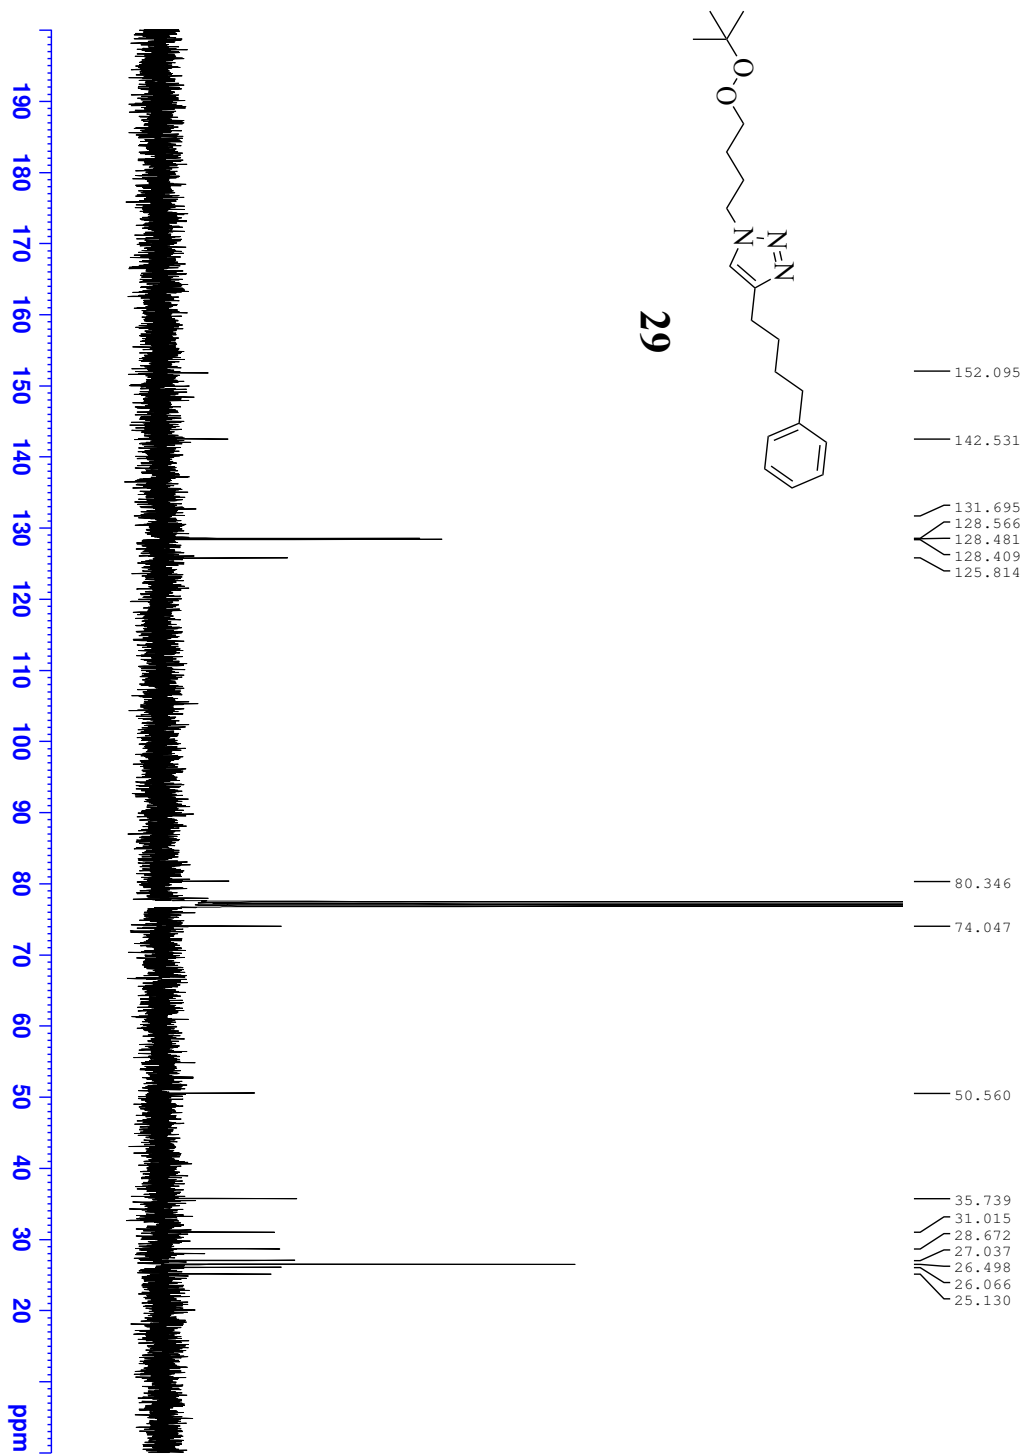

Figure 1: Pentanethiolate Functionalized Au NPs

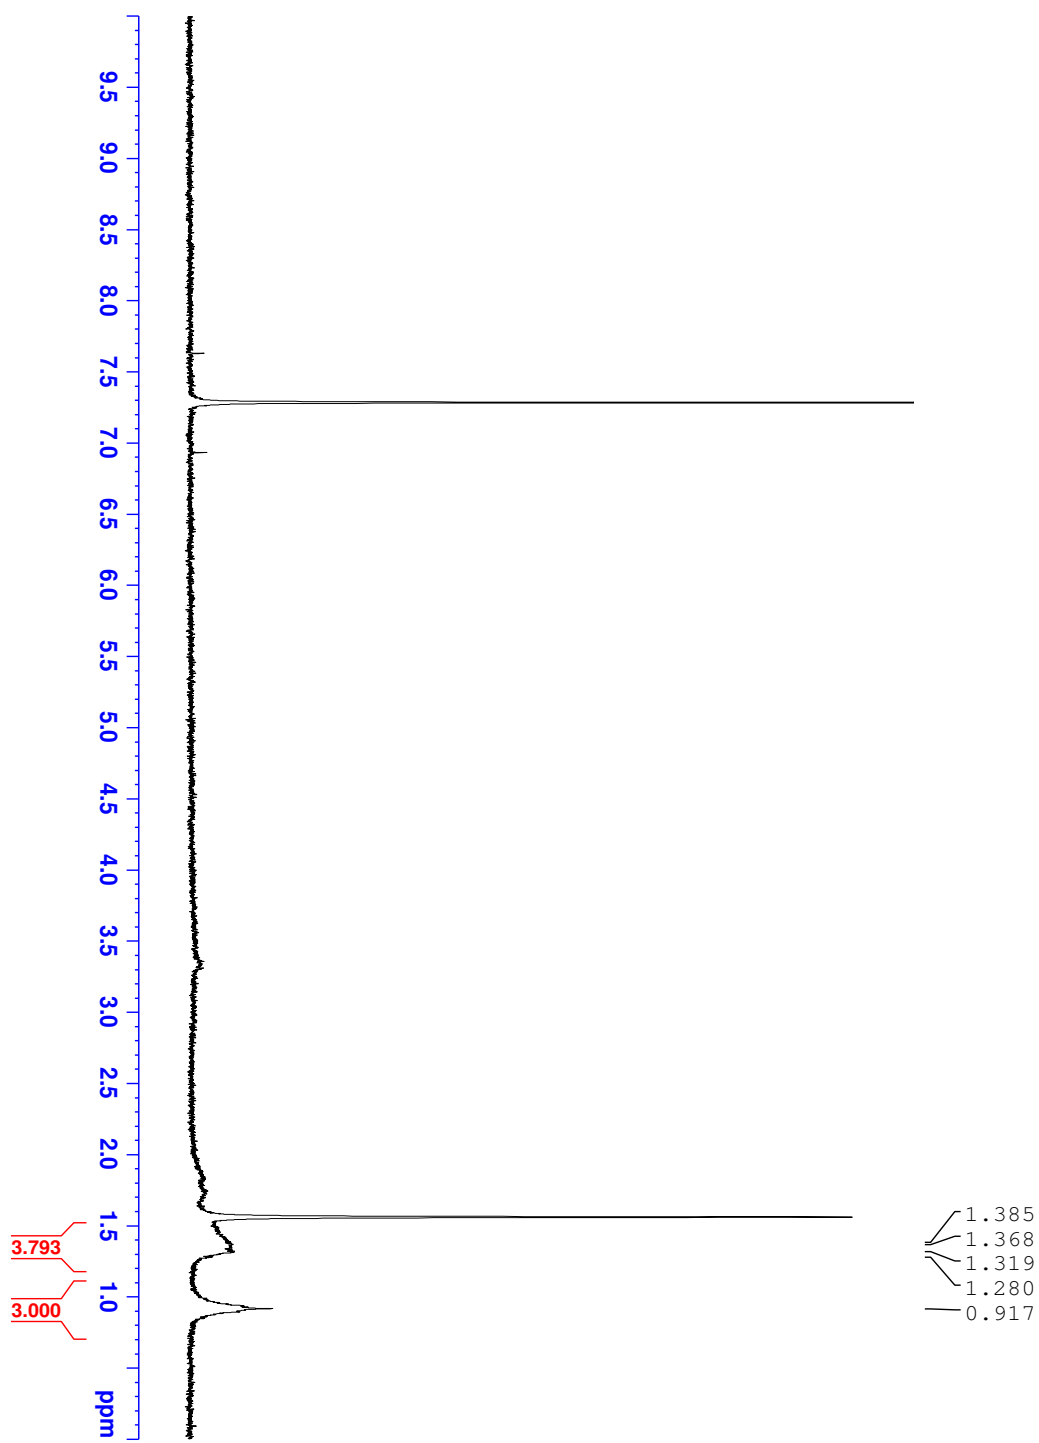

Figure 2: XPS Au Scan of Pentanethiolate Functionalized Au NPs

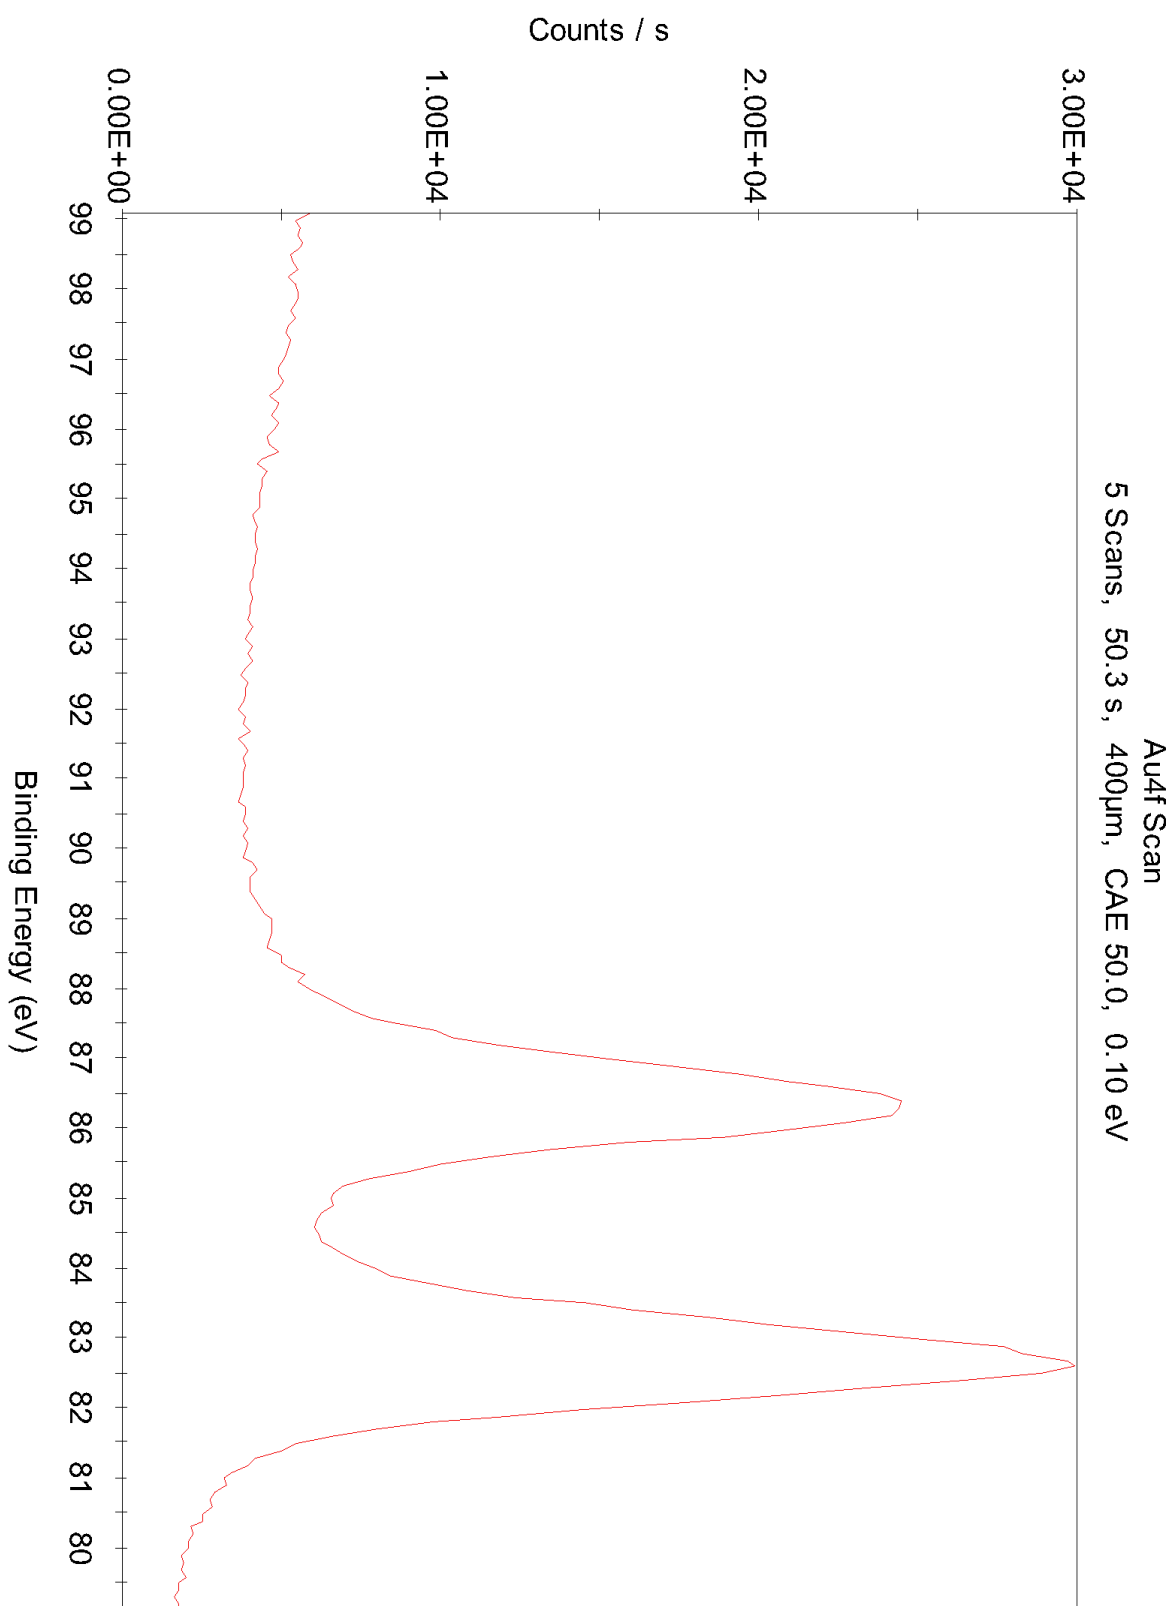

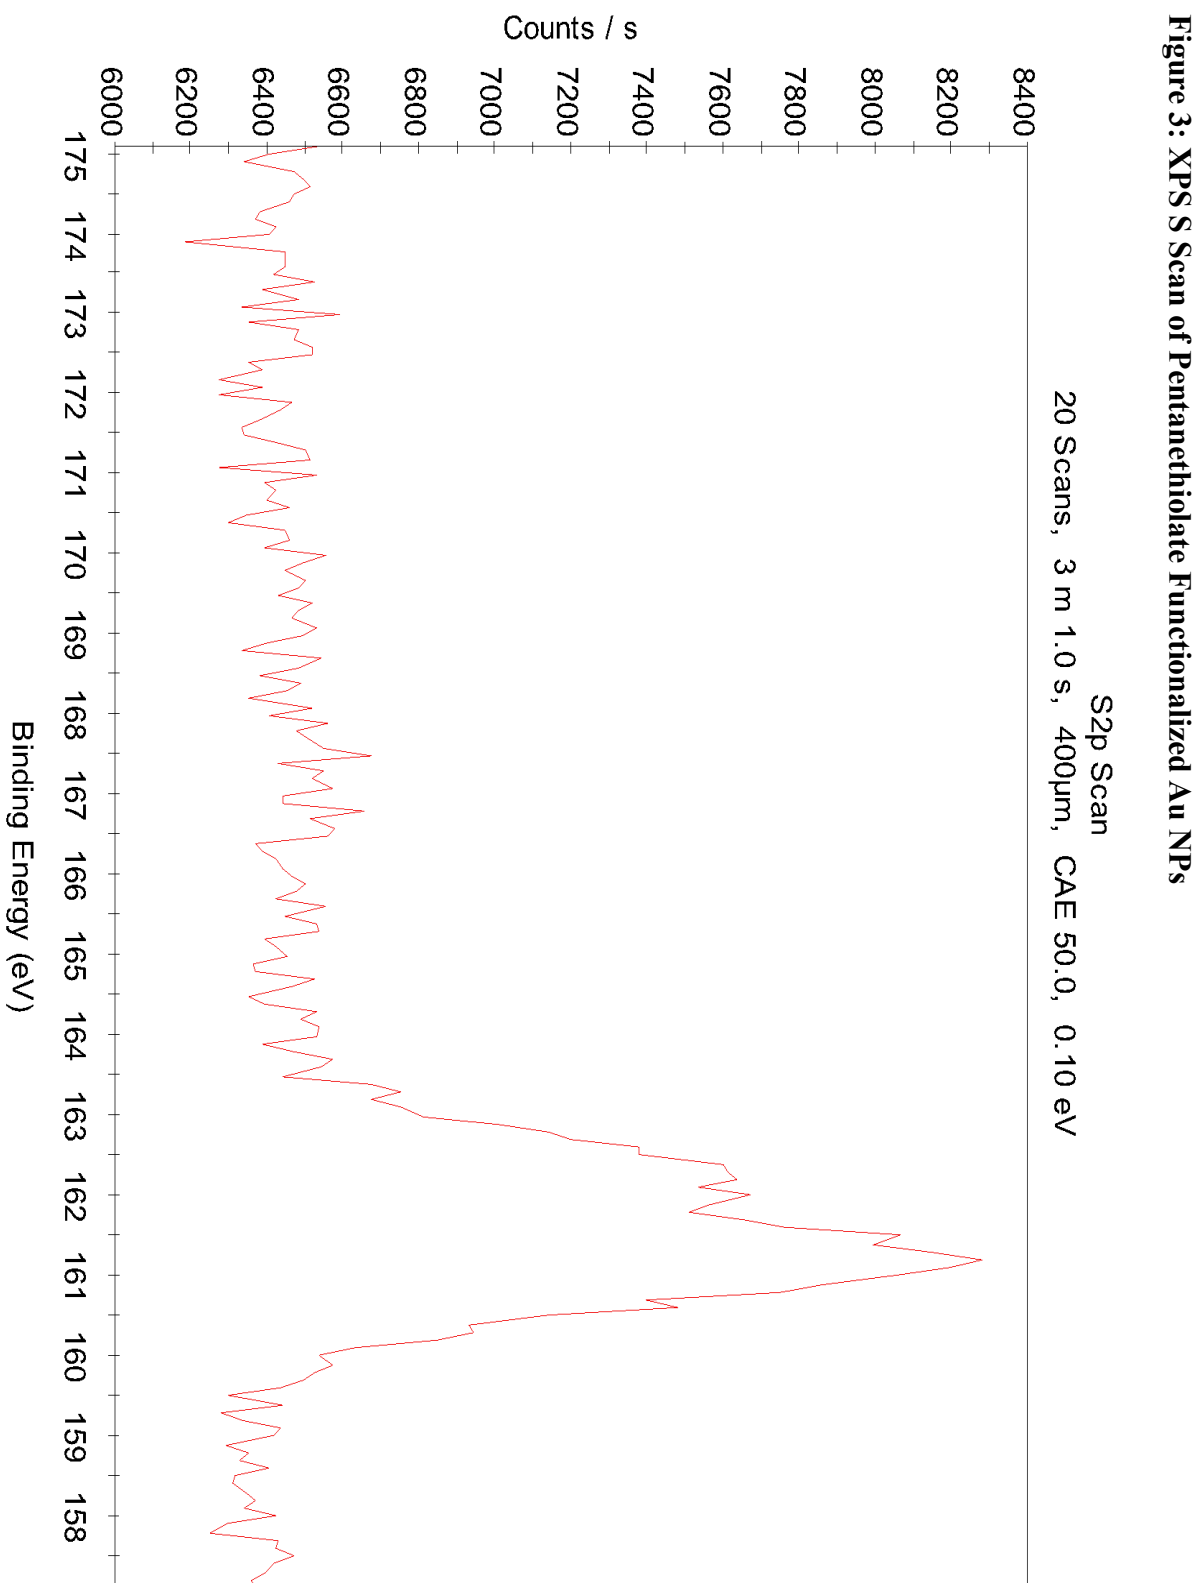

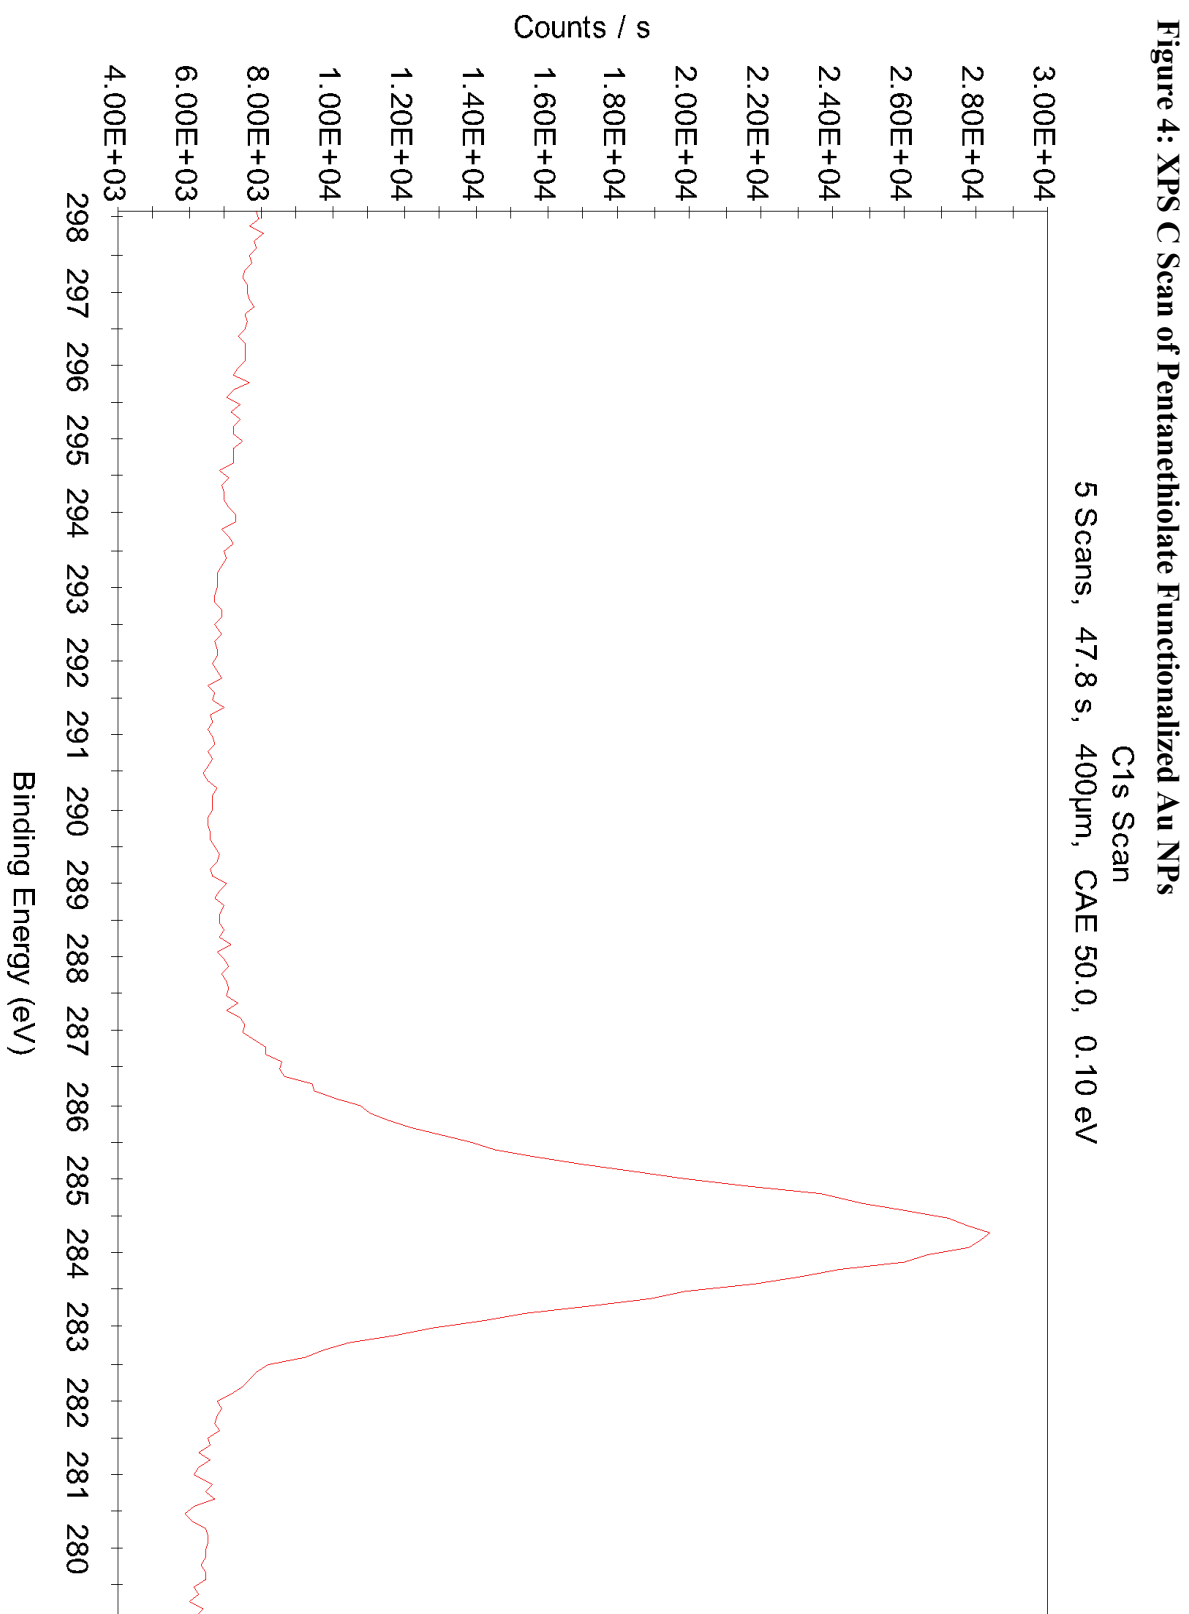

Figure 5: Dodecanethiolate Functionalized Au NPs

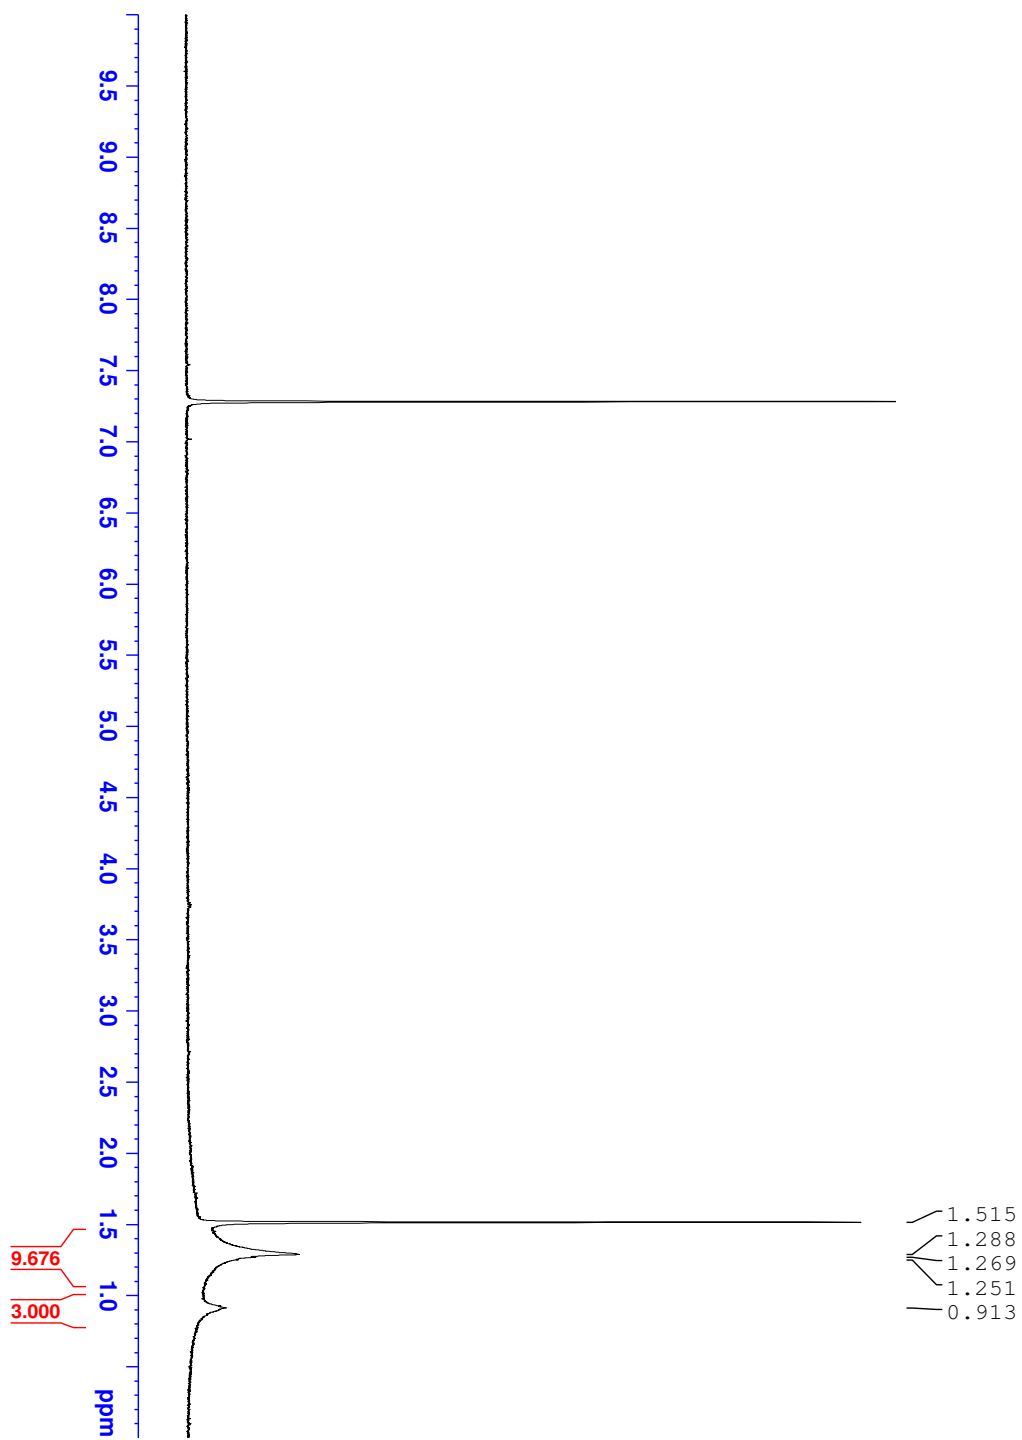

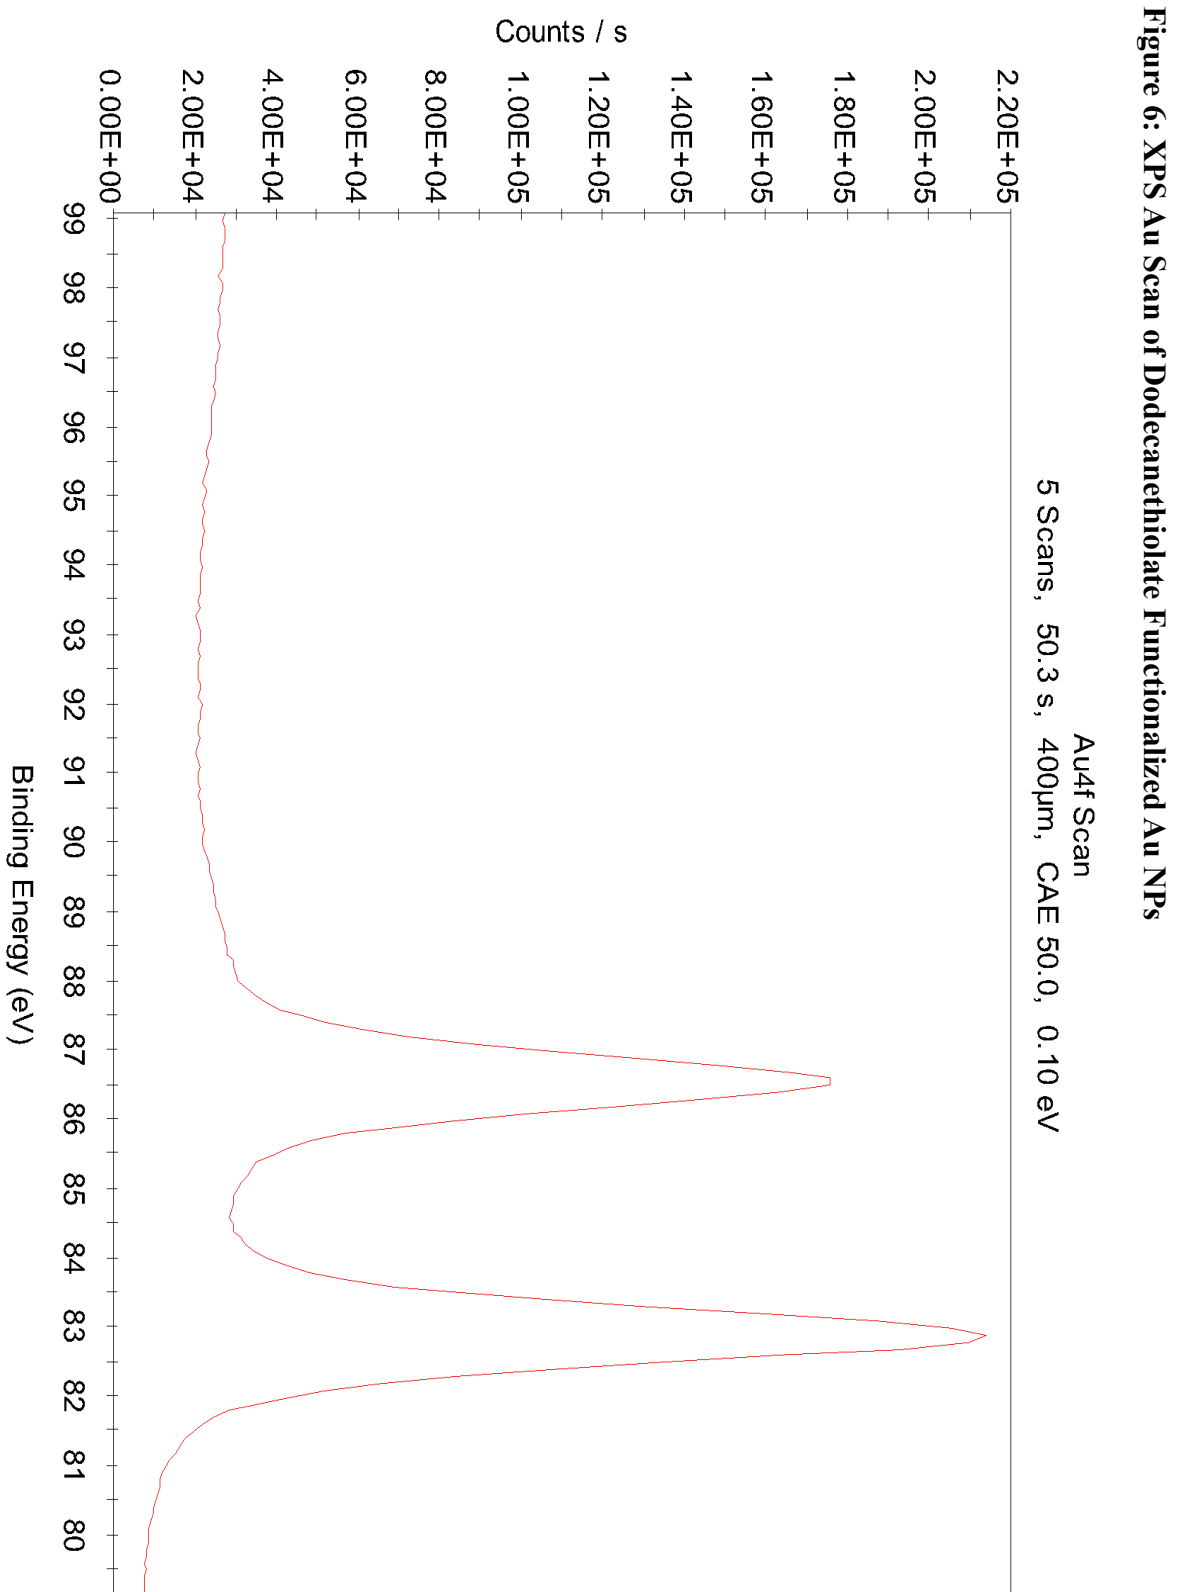

Figure 7: XPS S Scan of Dodecanethiolate Functionalized Au NPs

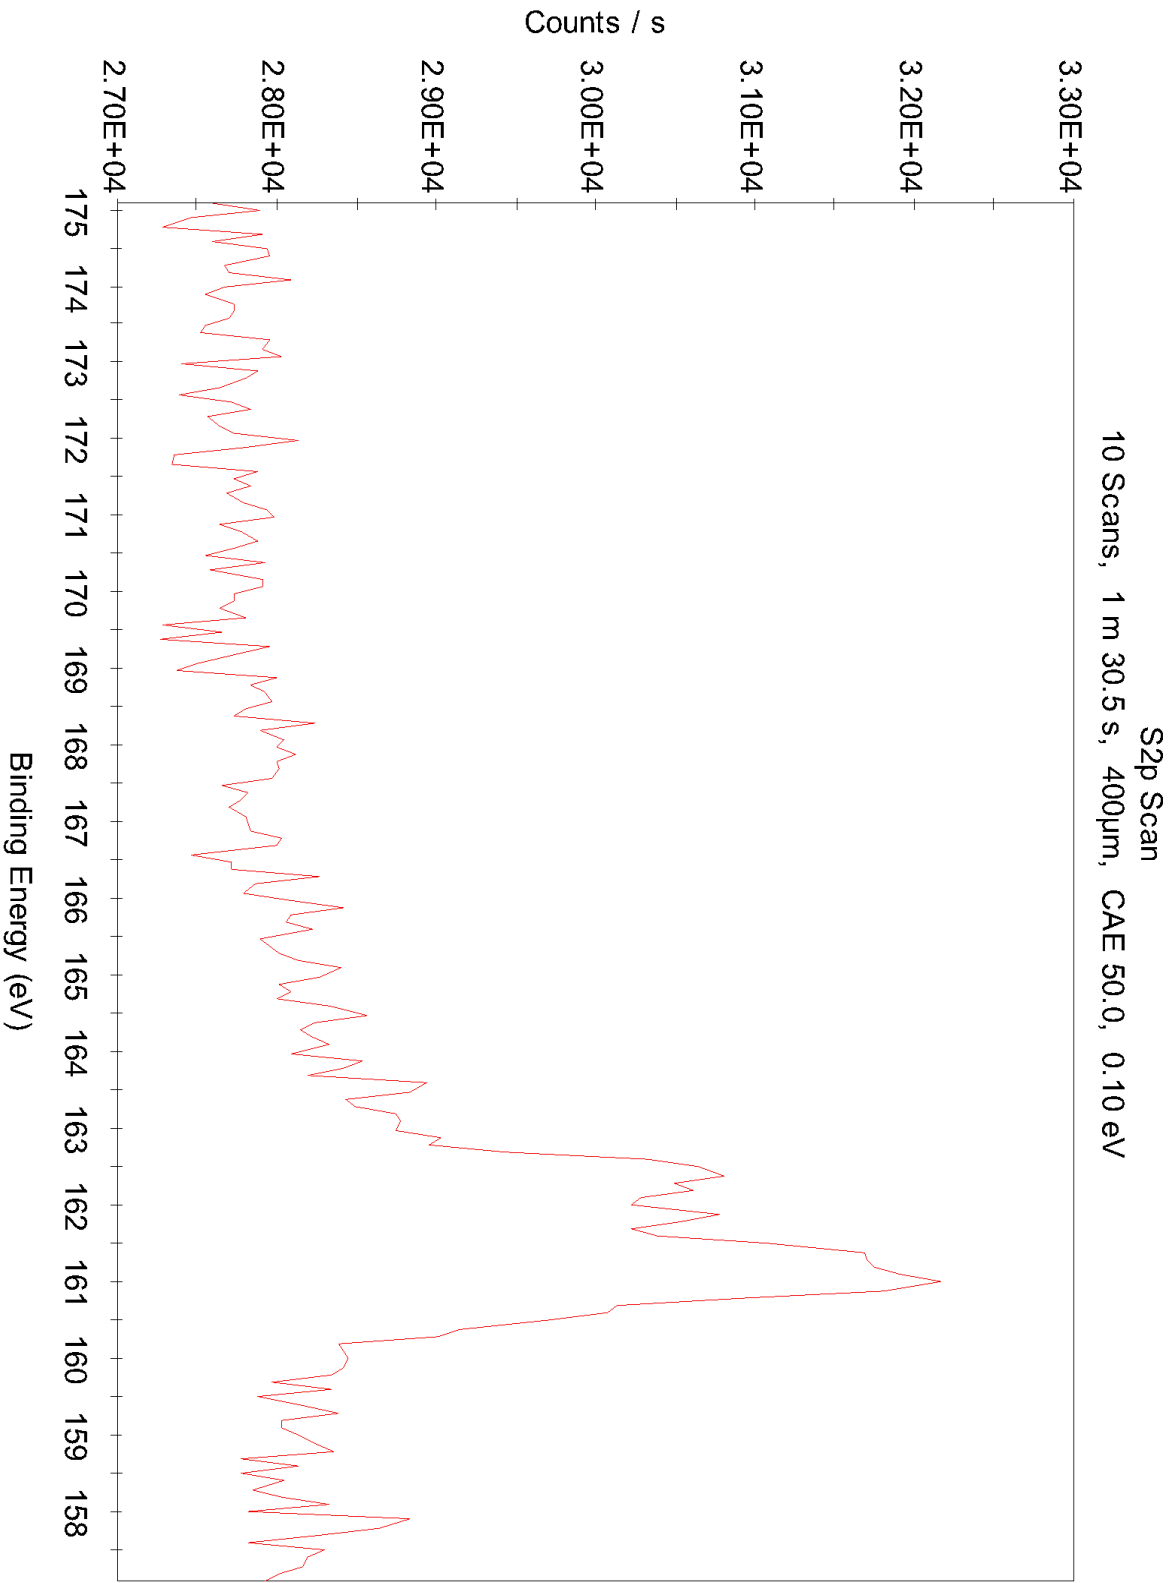



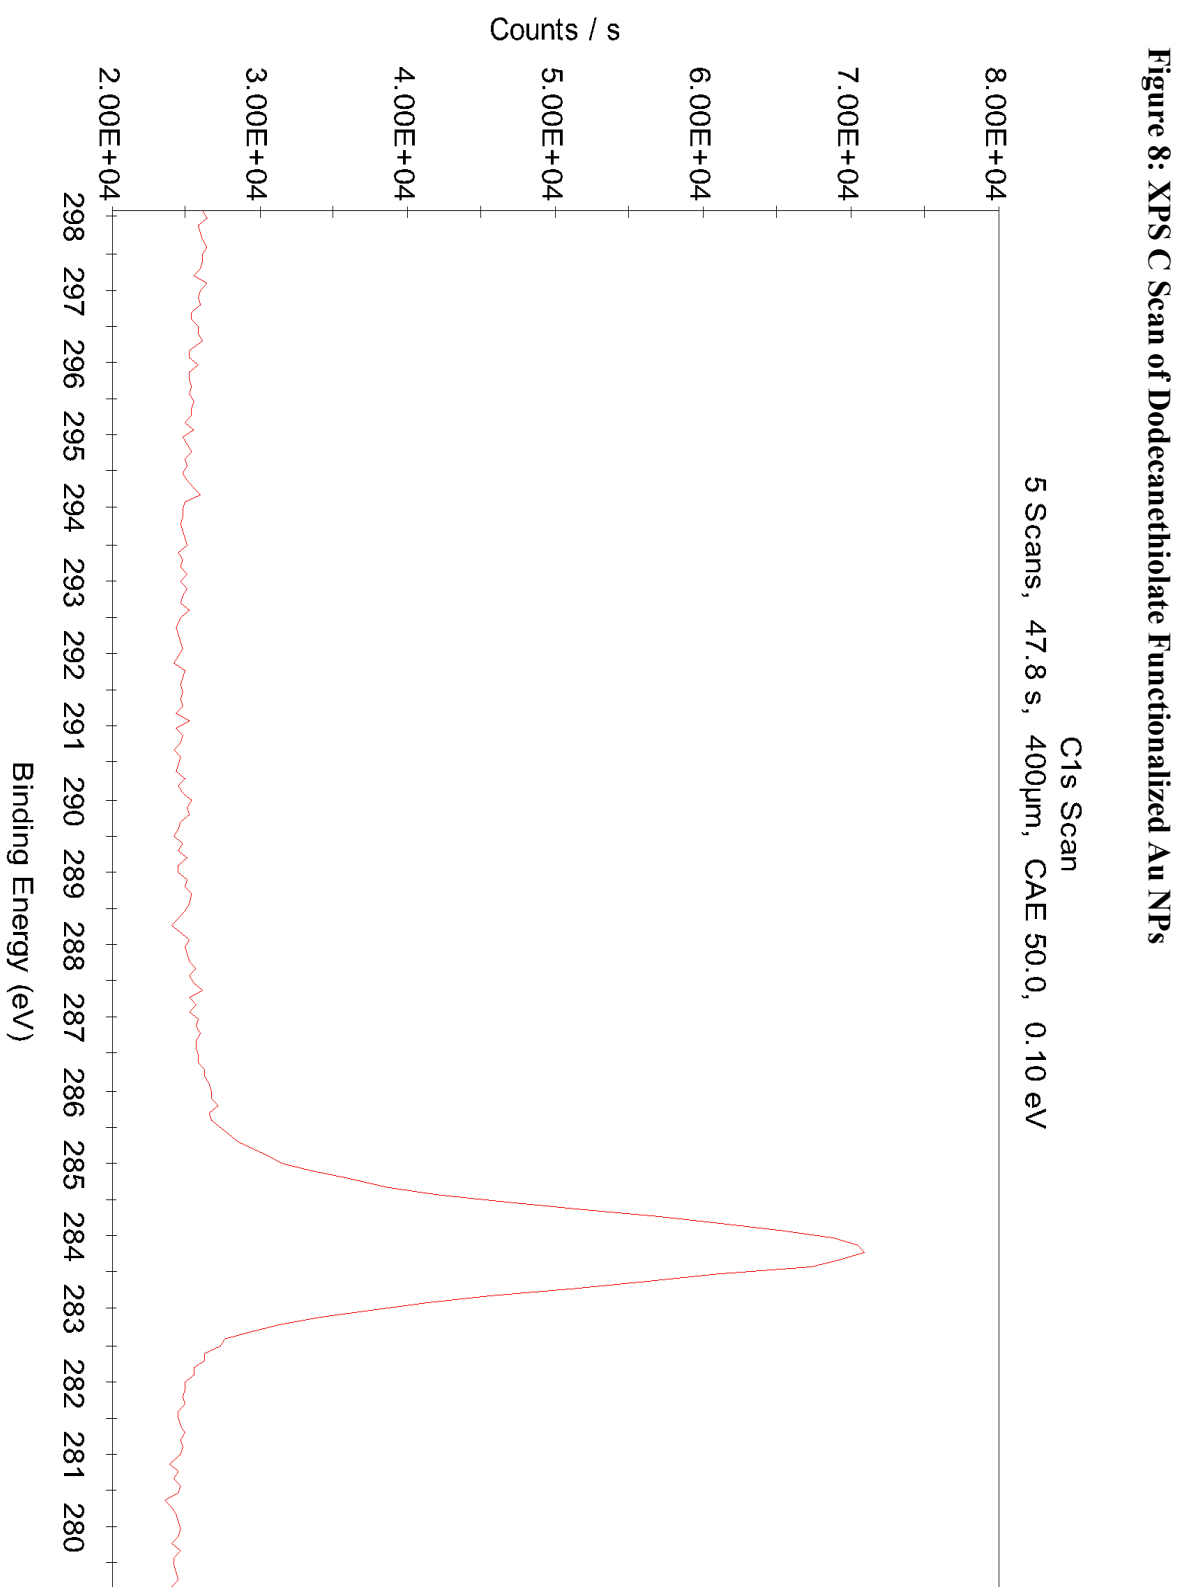

Figure 9: Azide Functionalized Au NPs

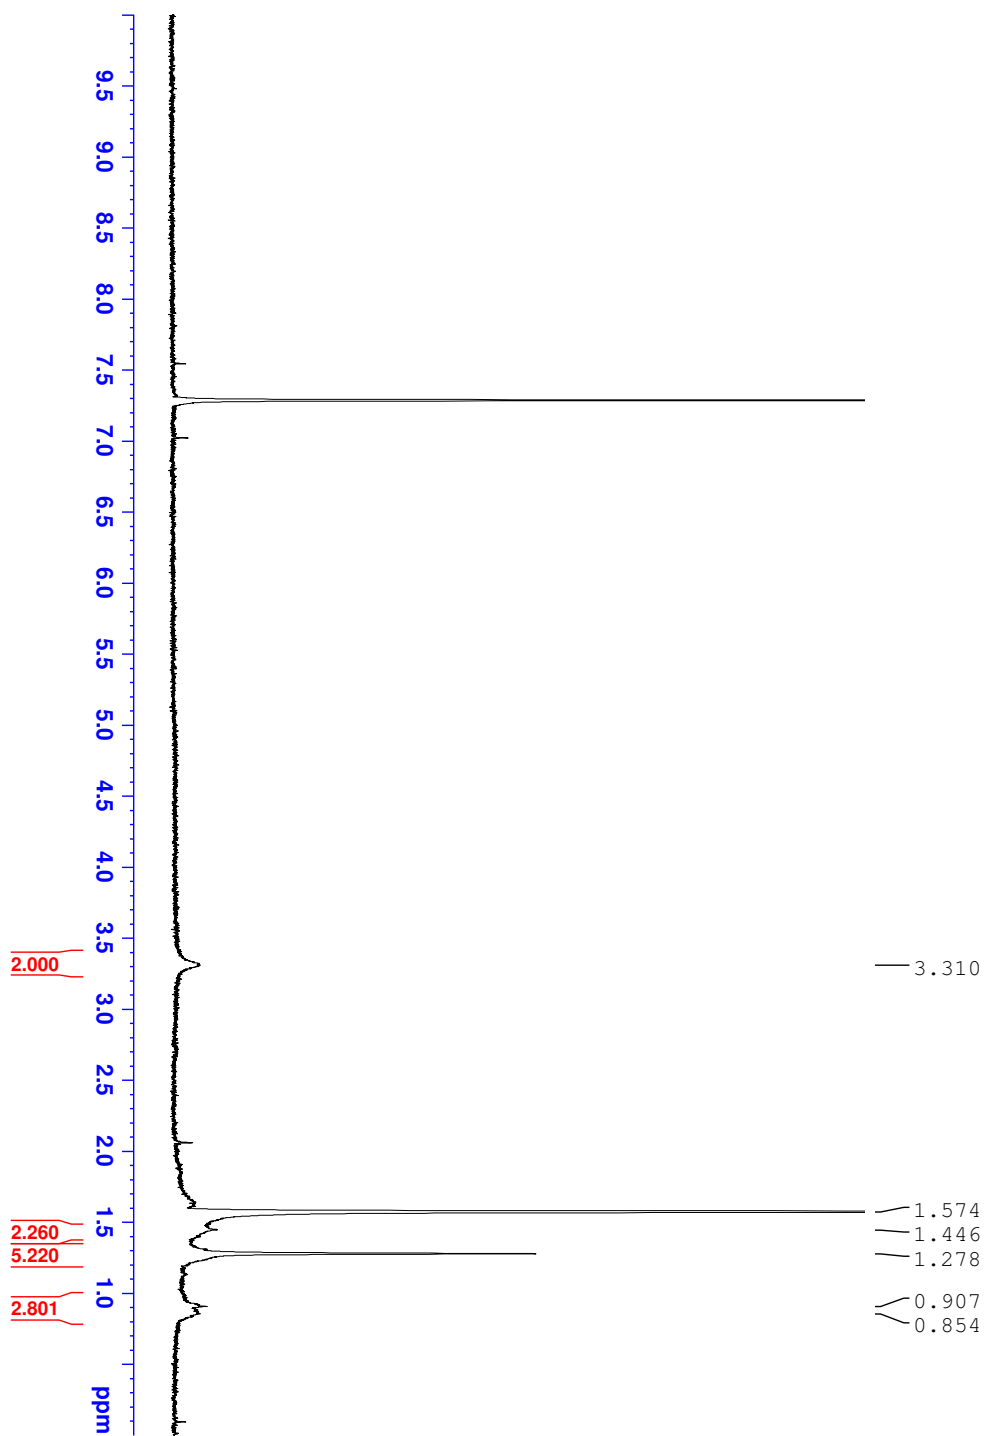

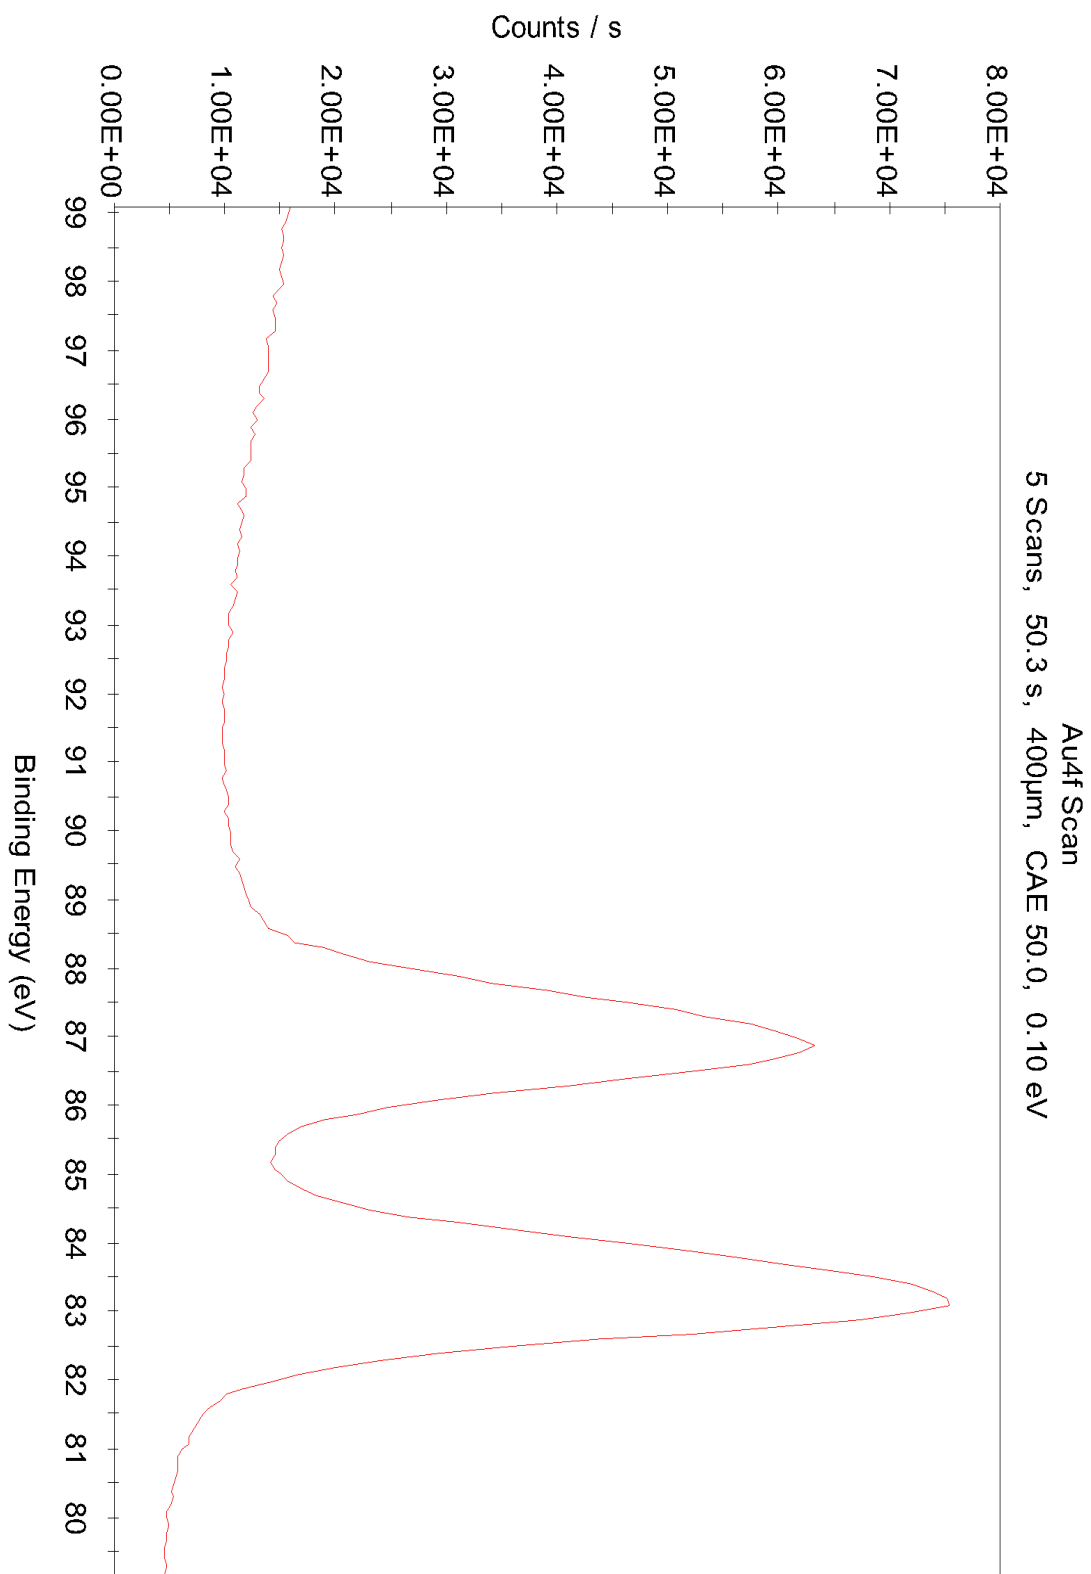

Figure 11: XPS S Scan of Azide Functionalized Au NPs

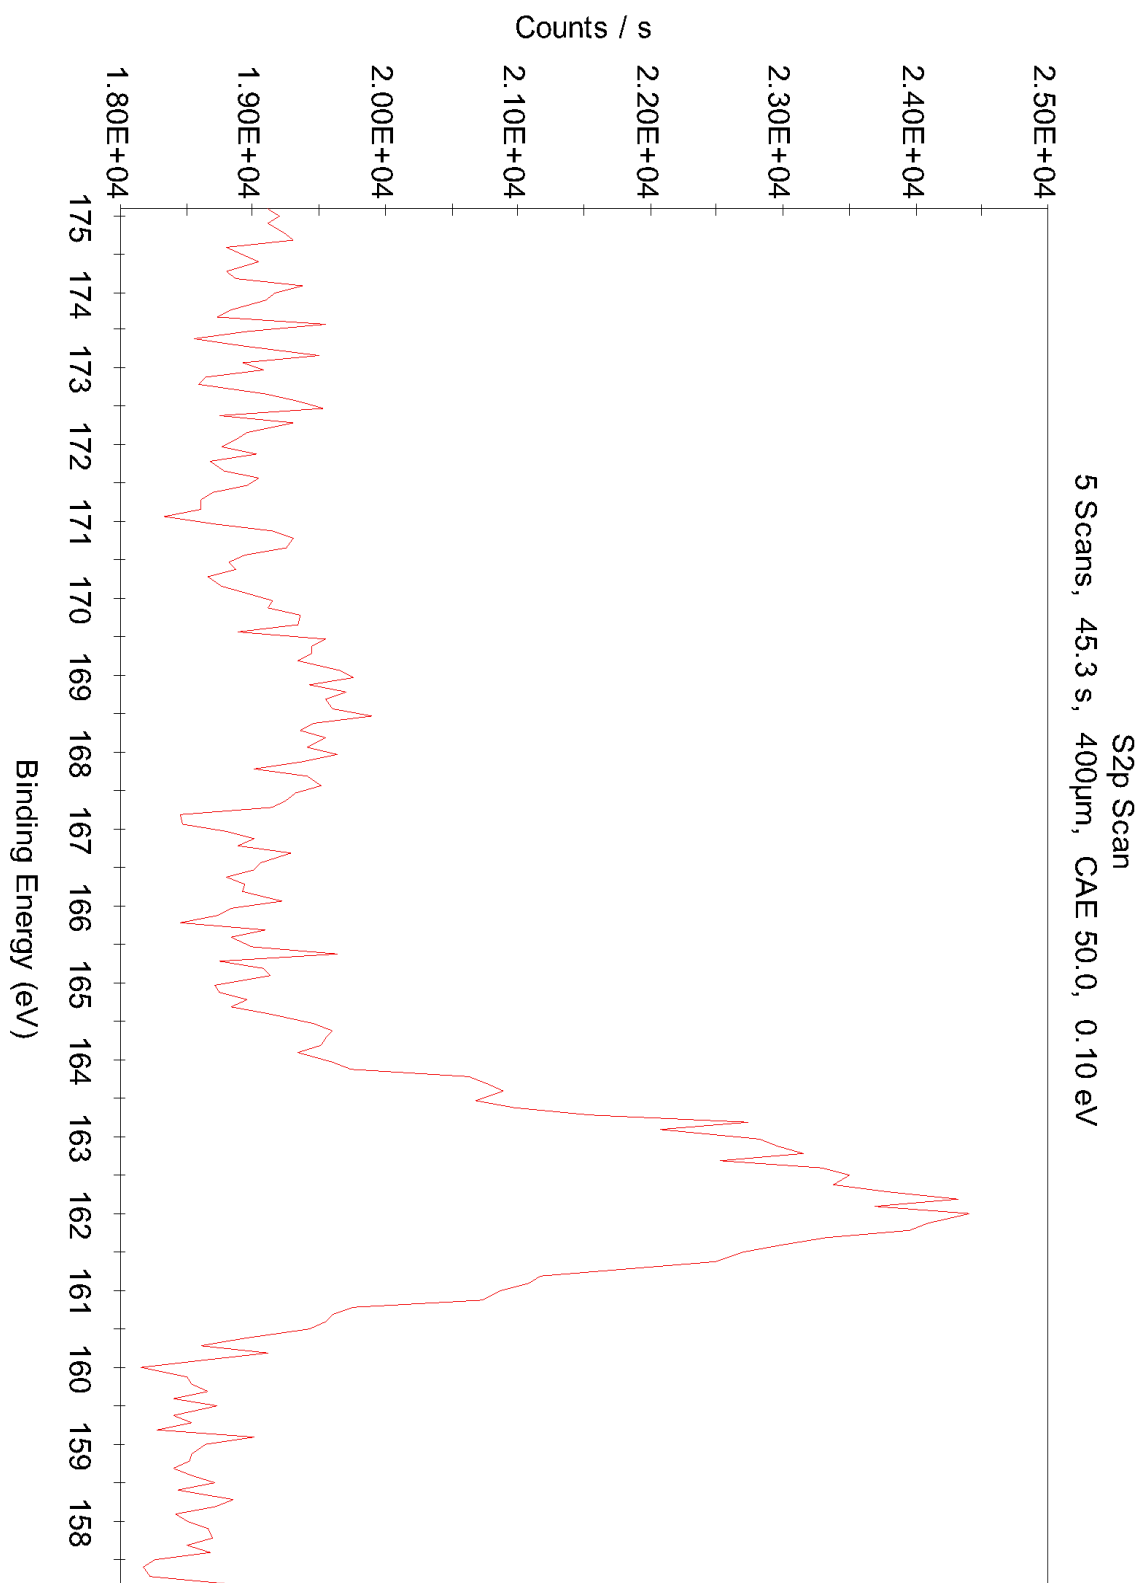

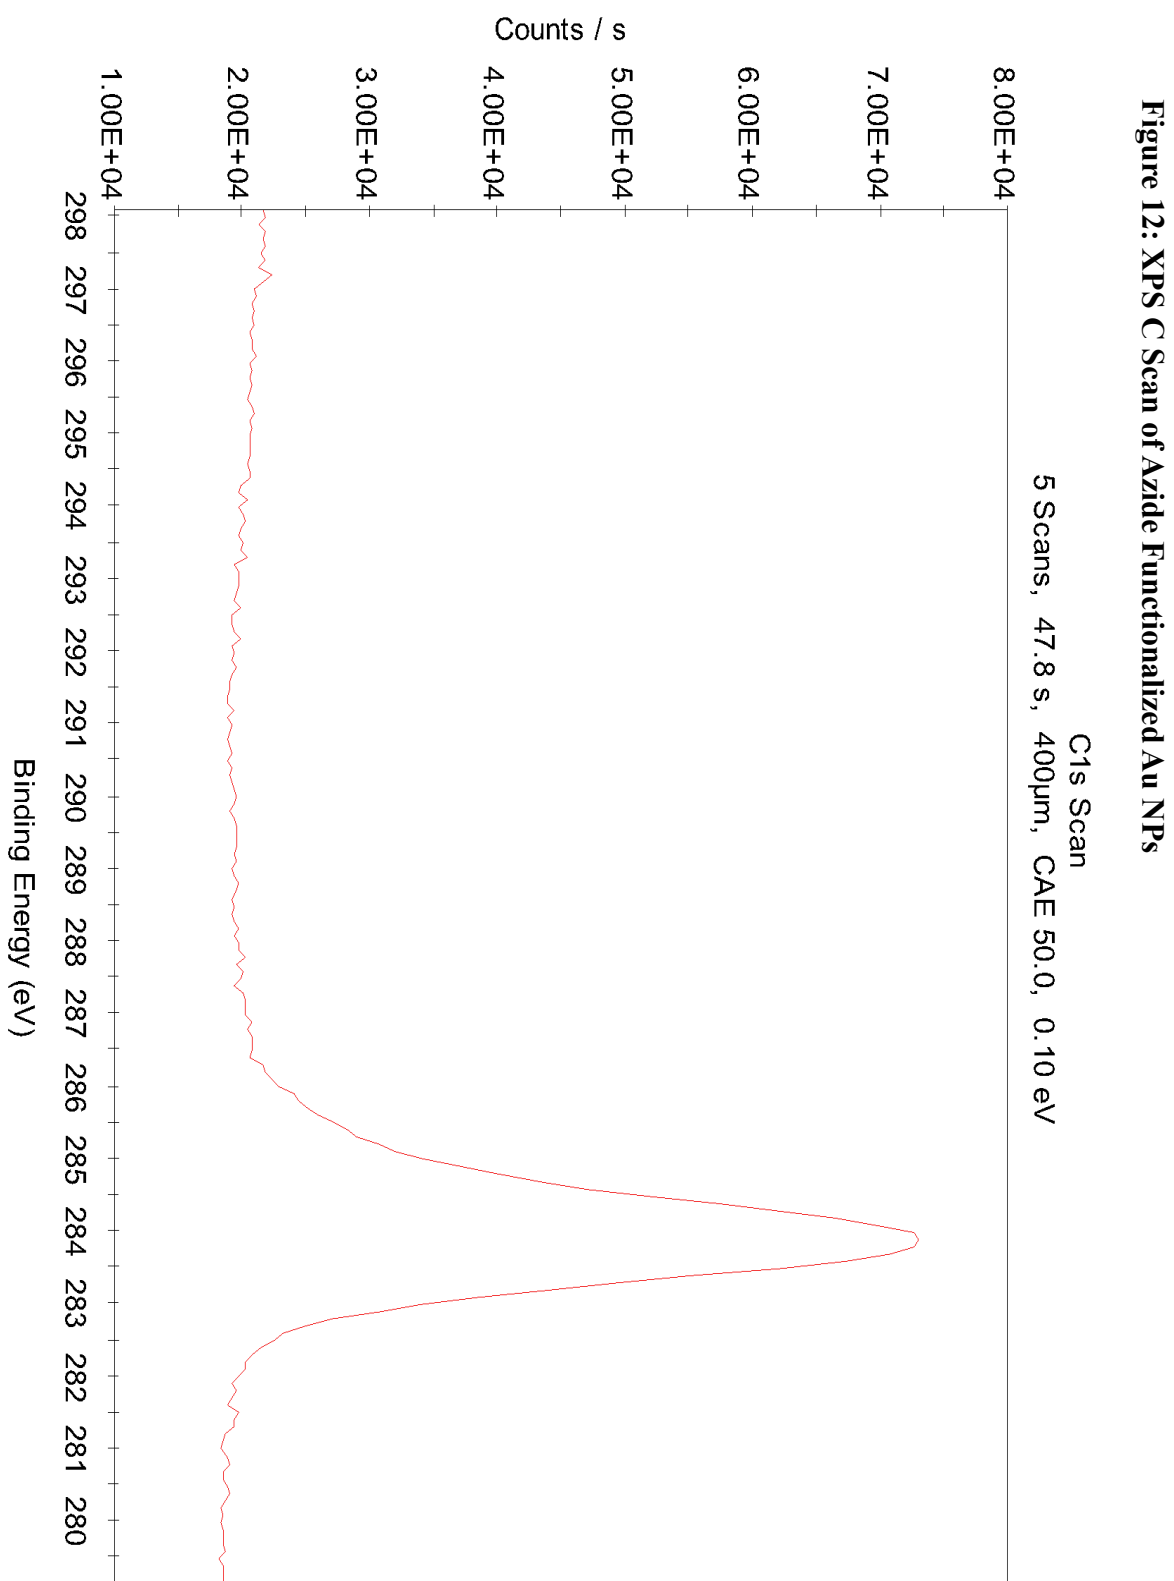

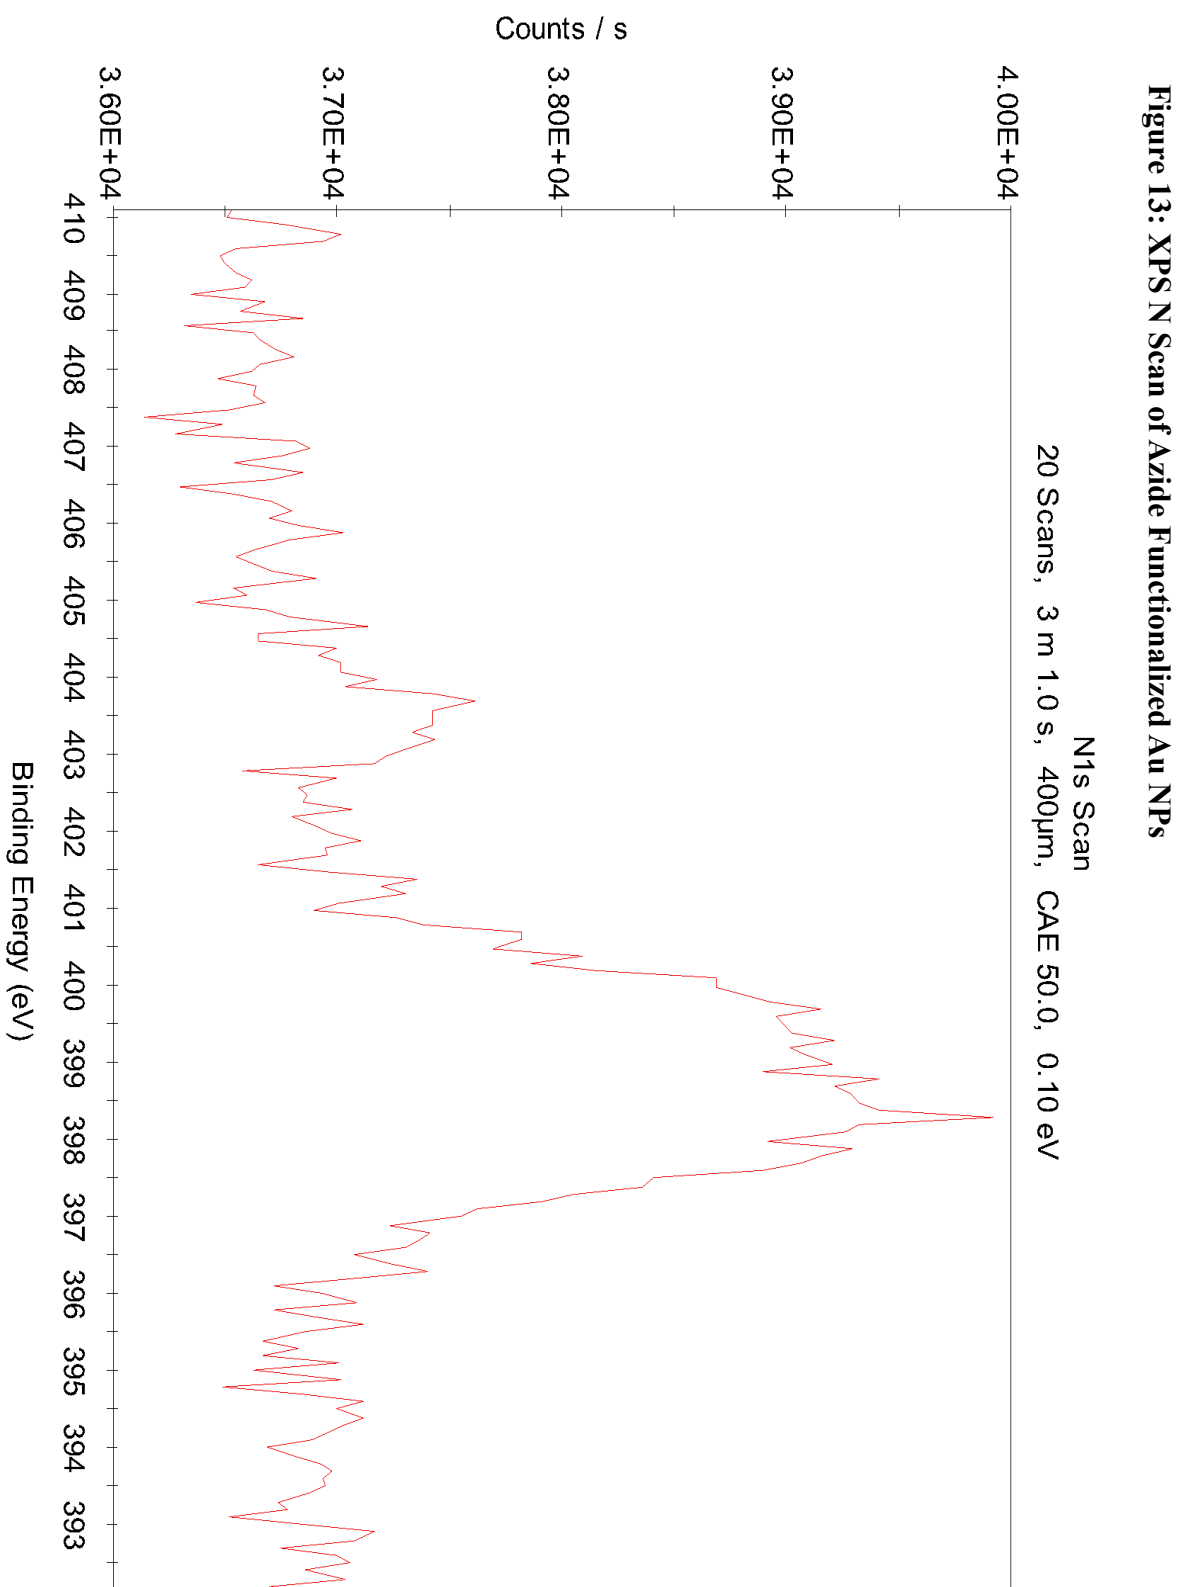

Figure 14: Peroxide Functionalized Au NPs

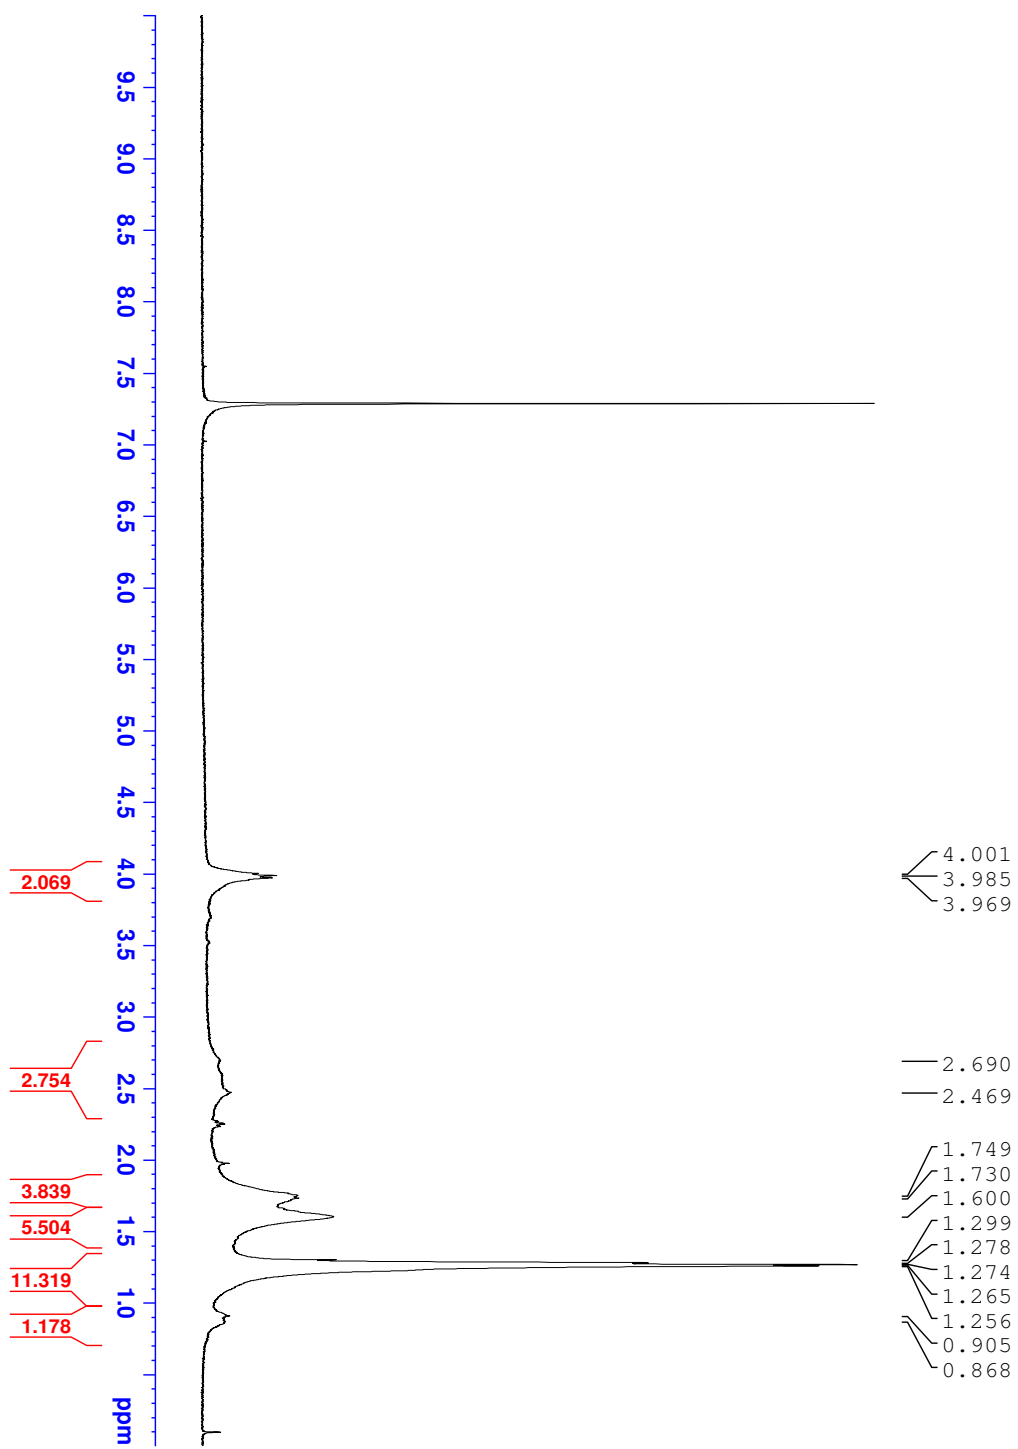

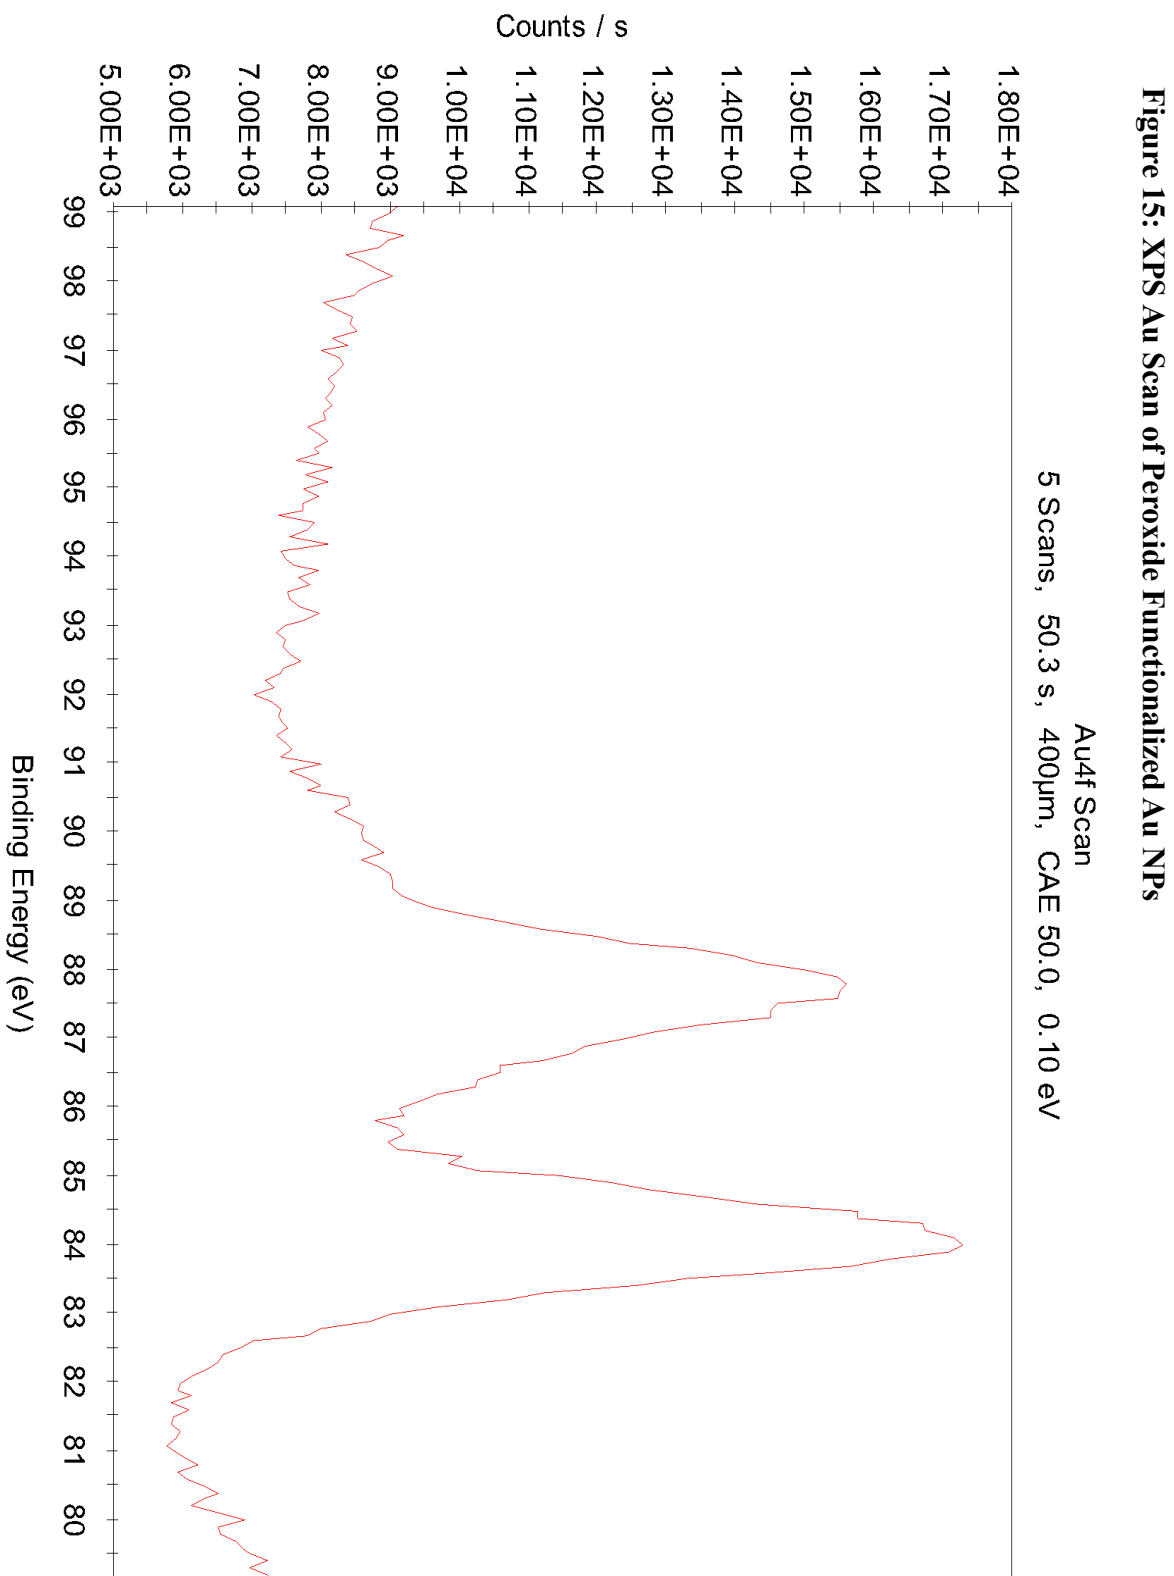



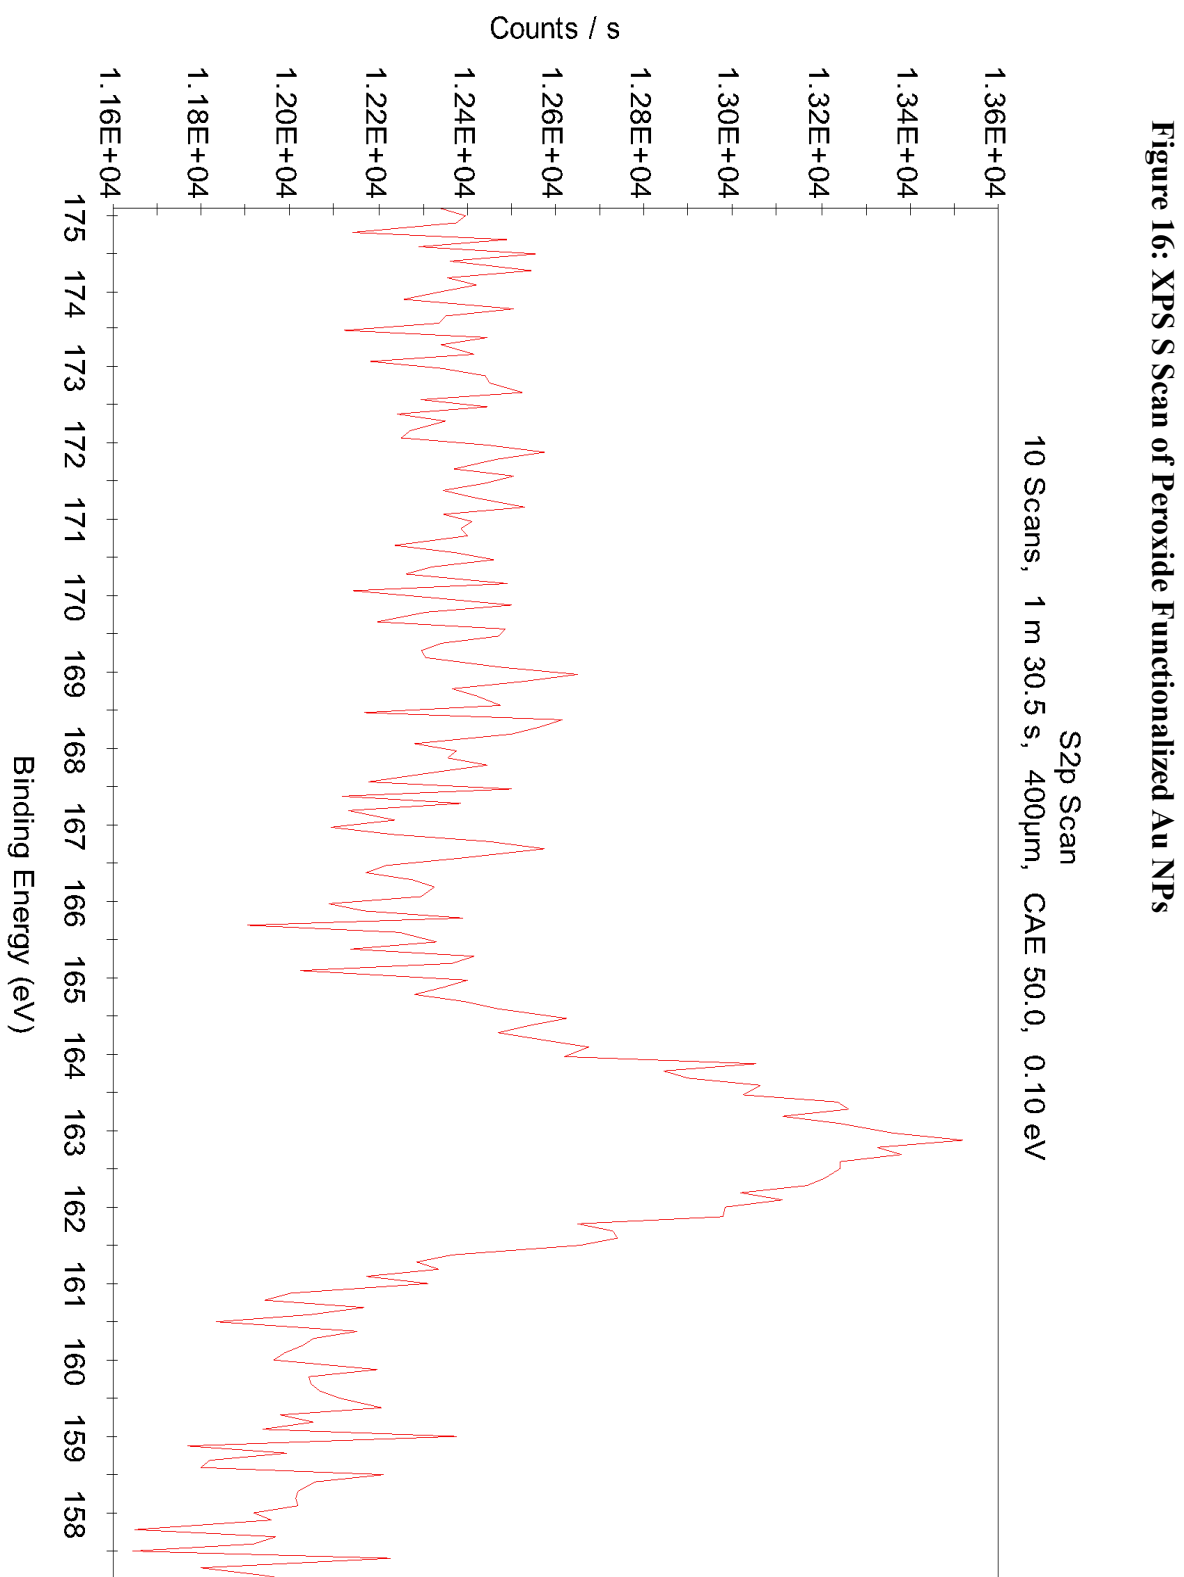

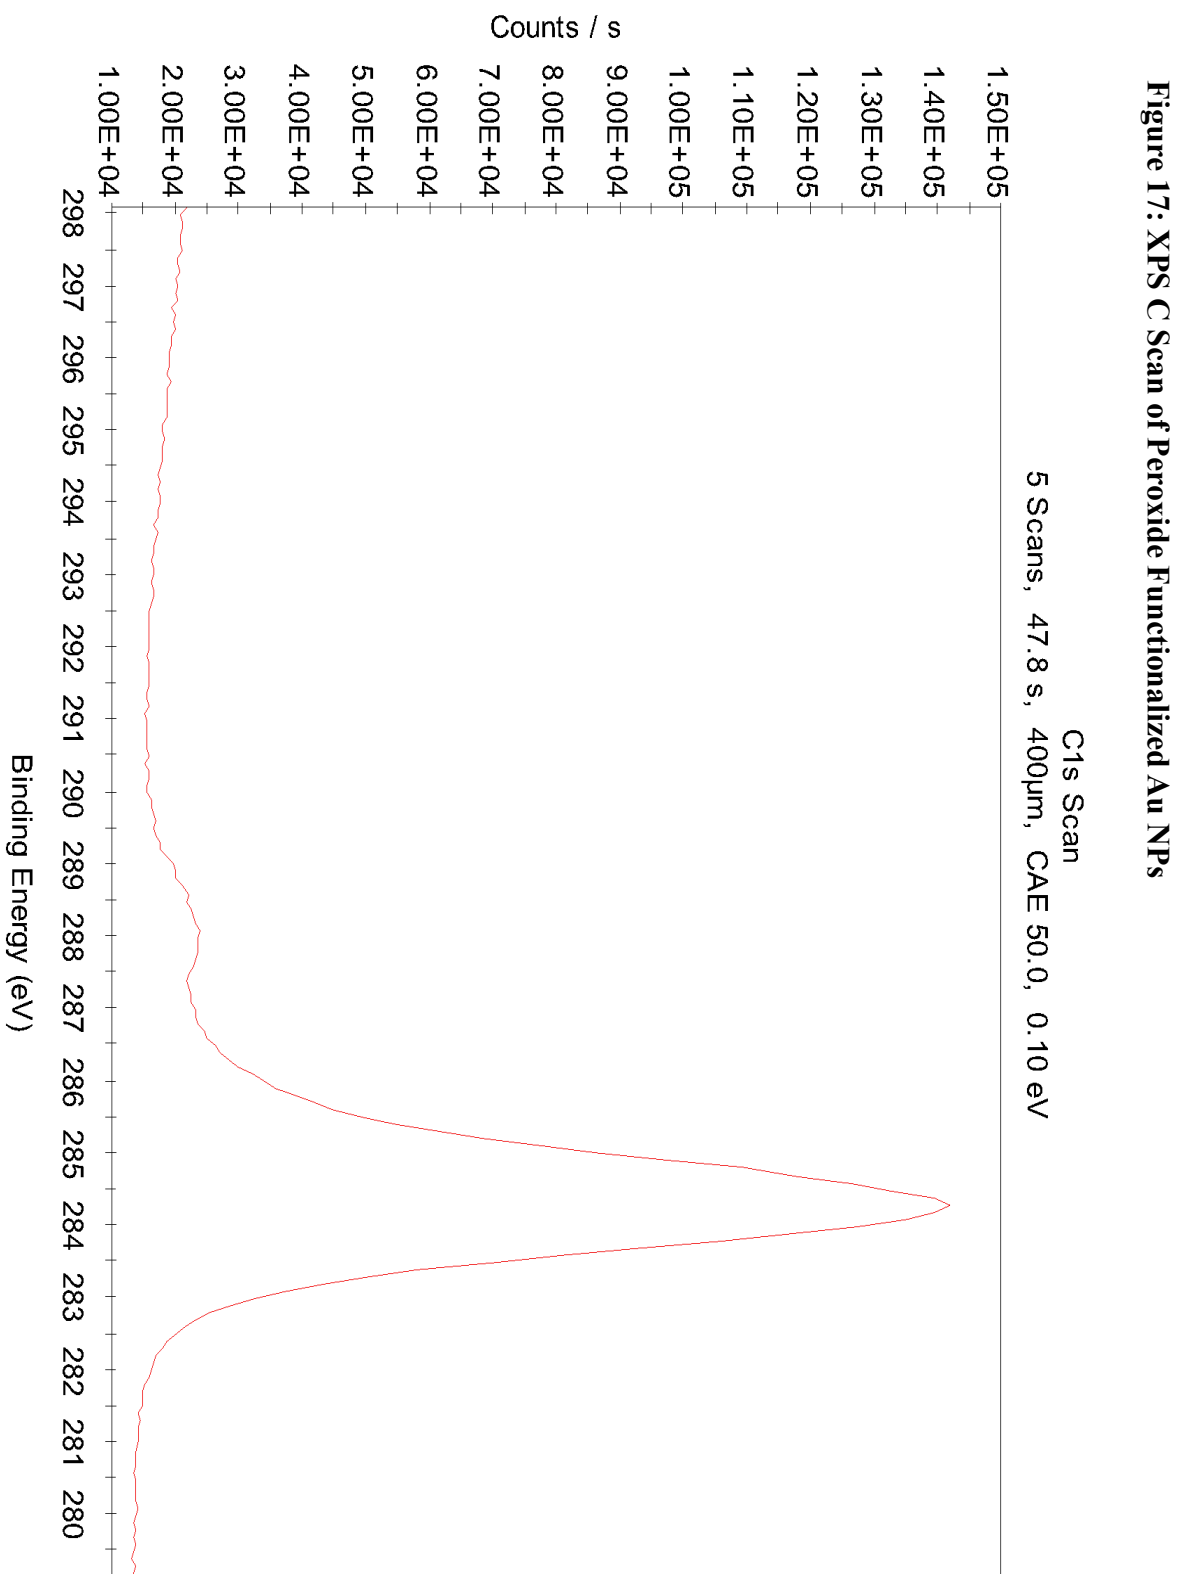

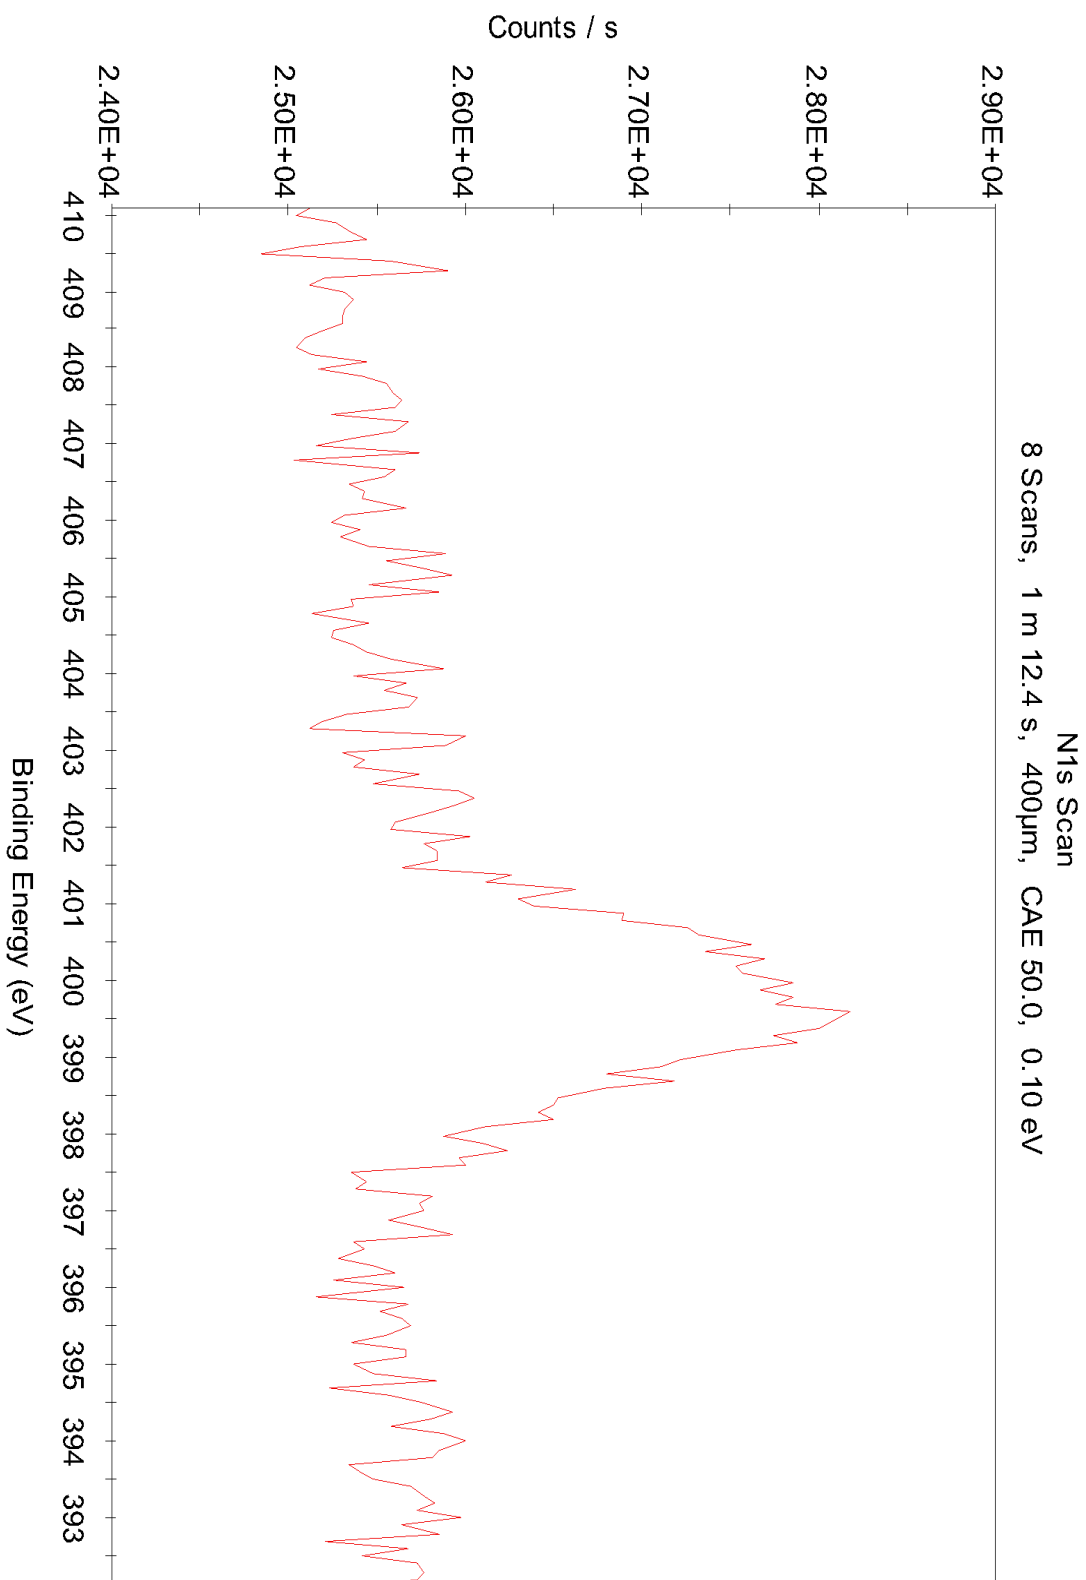

Figure 18: XPS N Scan of Peroxide Functionalized Au NPs

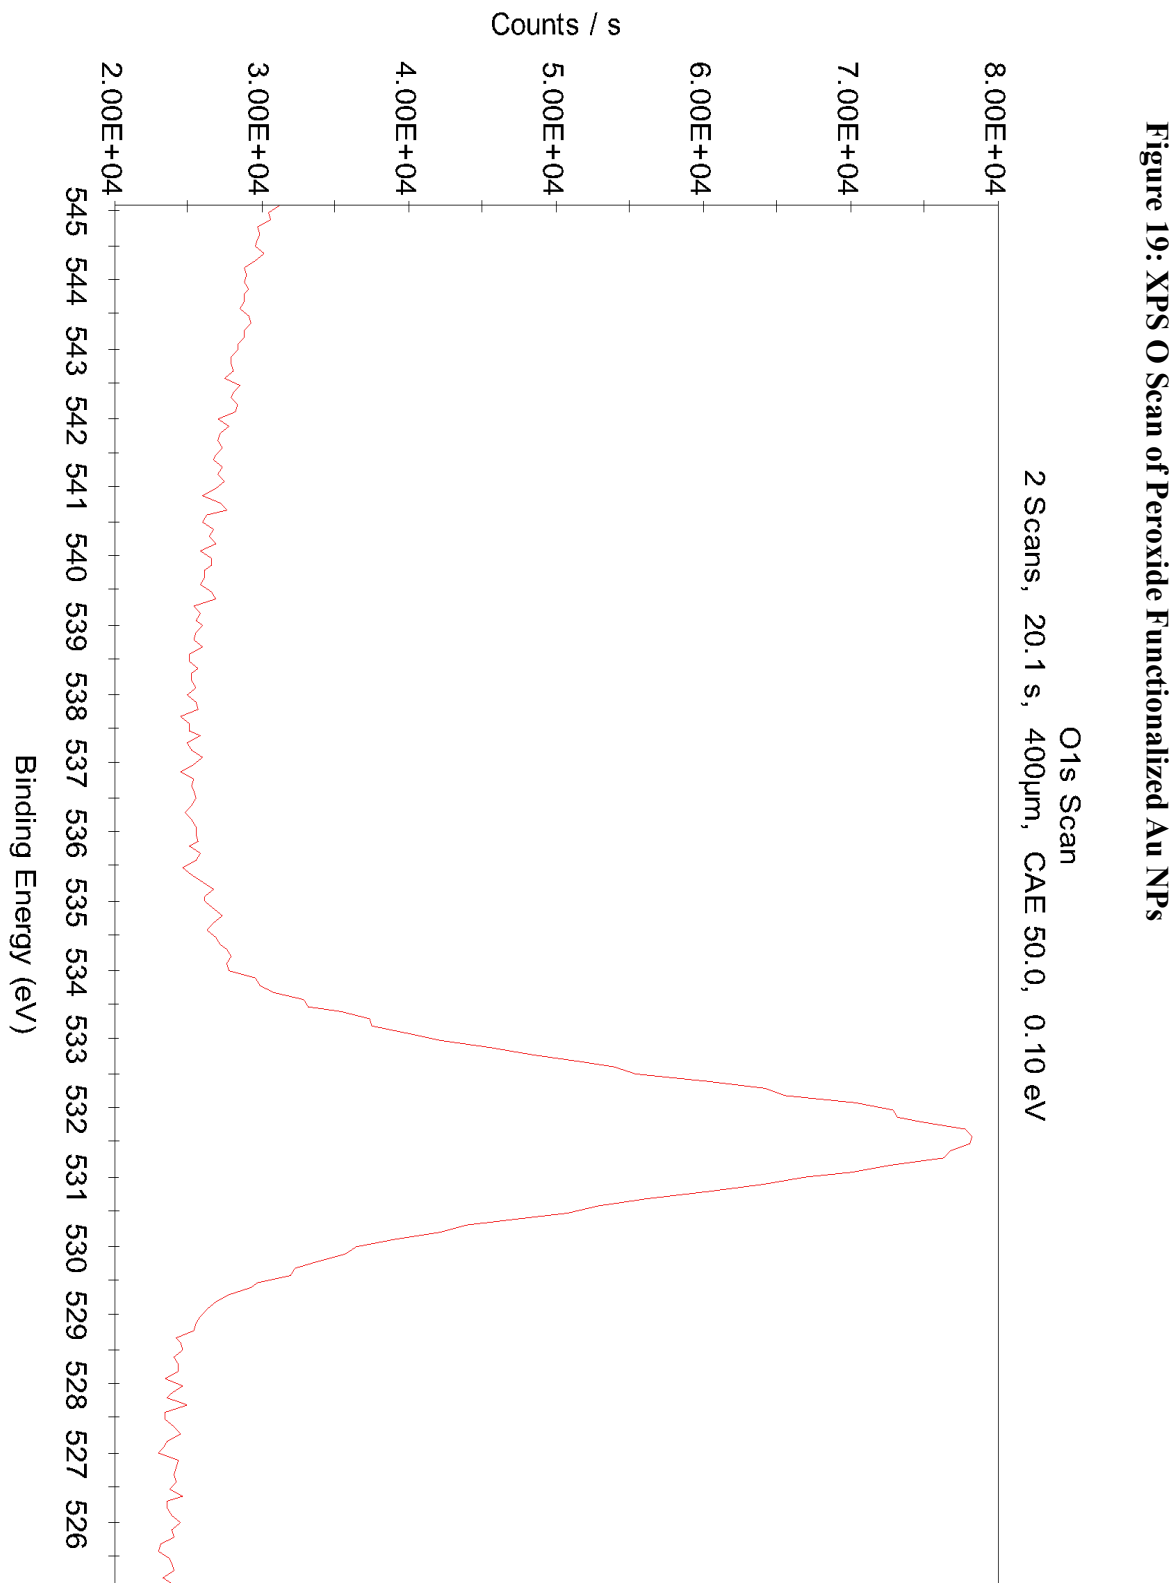

Figure 20: Peroxyacetal Functionalized Au NPs

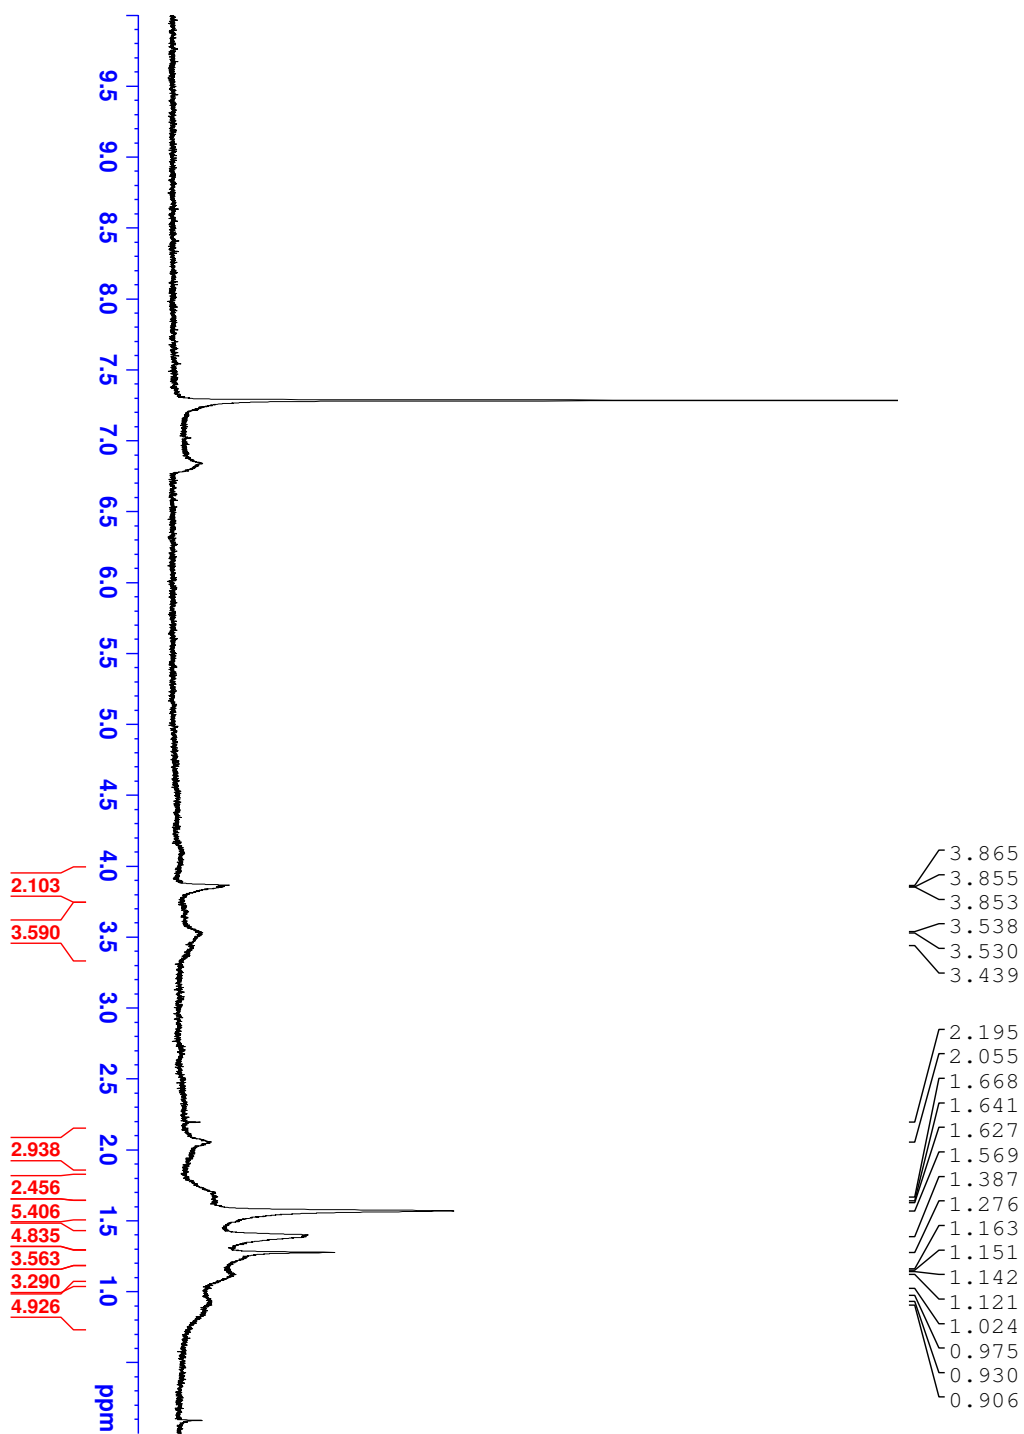

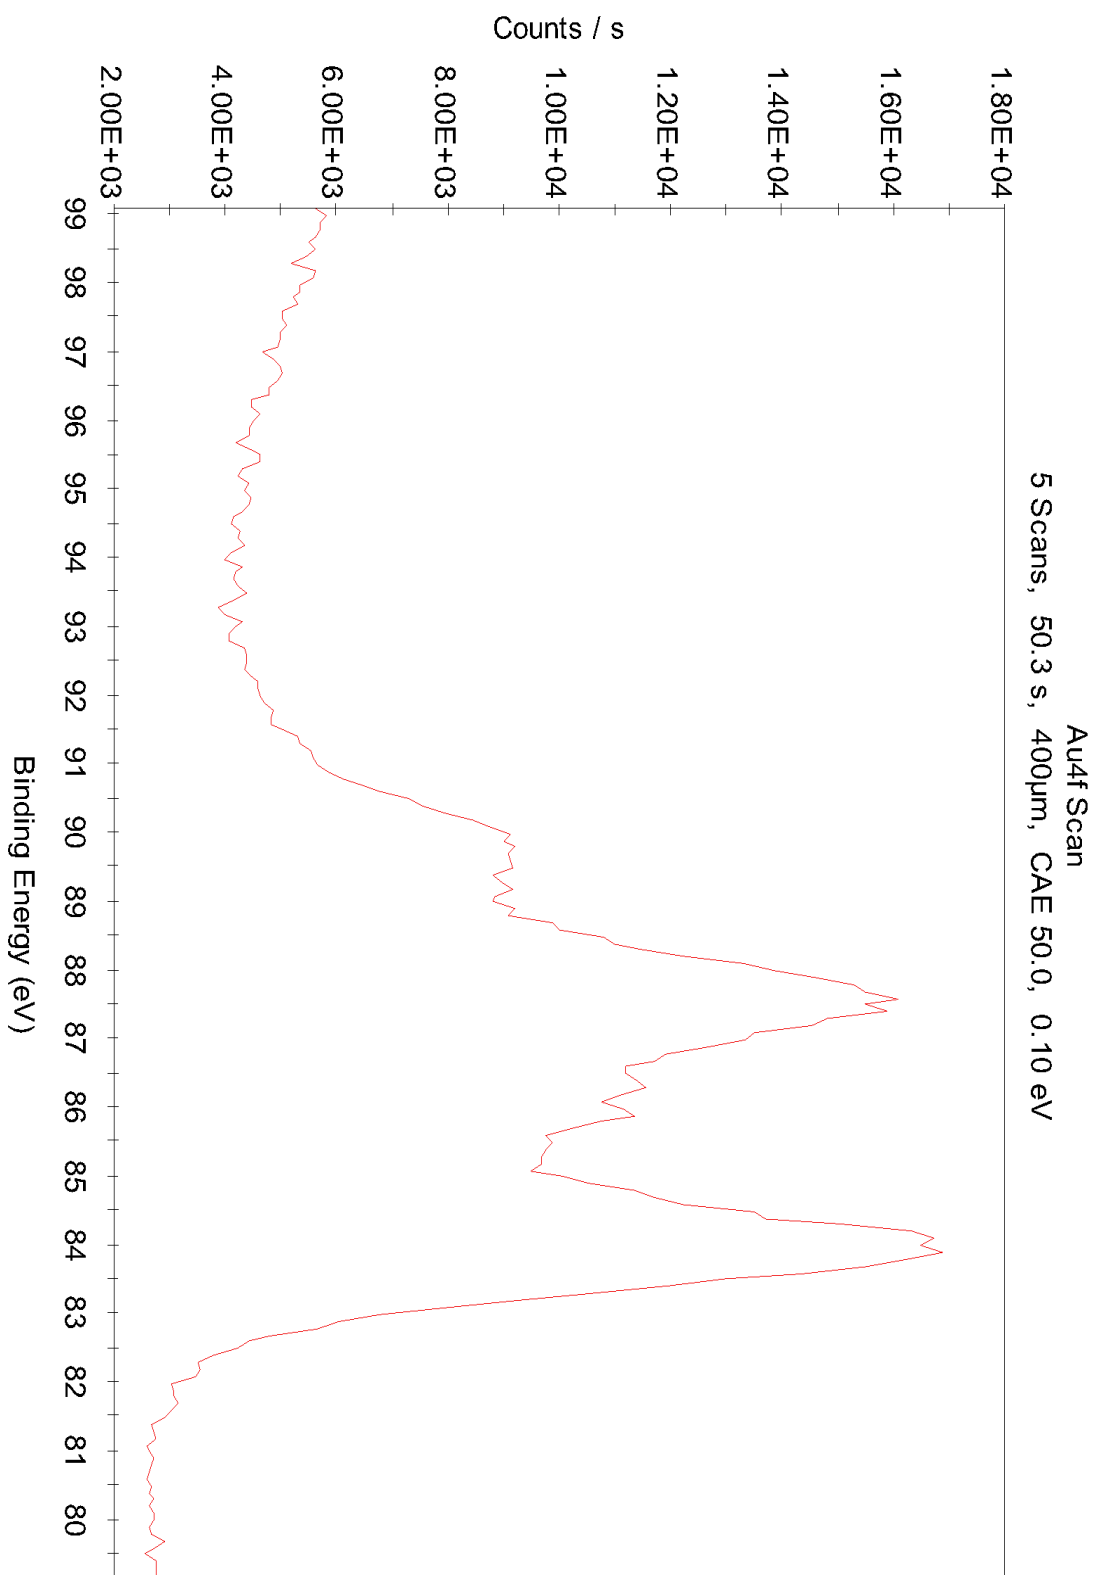

Figure 21: XPS Au Scan of Peroxyacetal Functionalized Au NPs

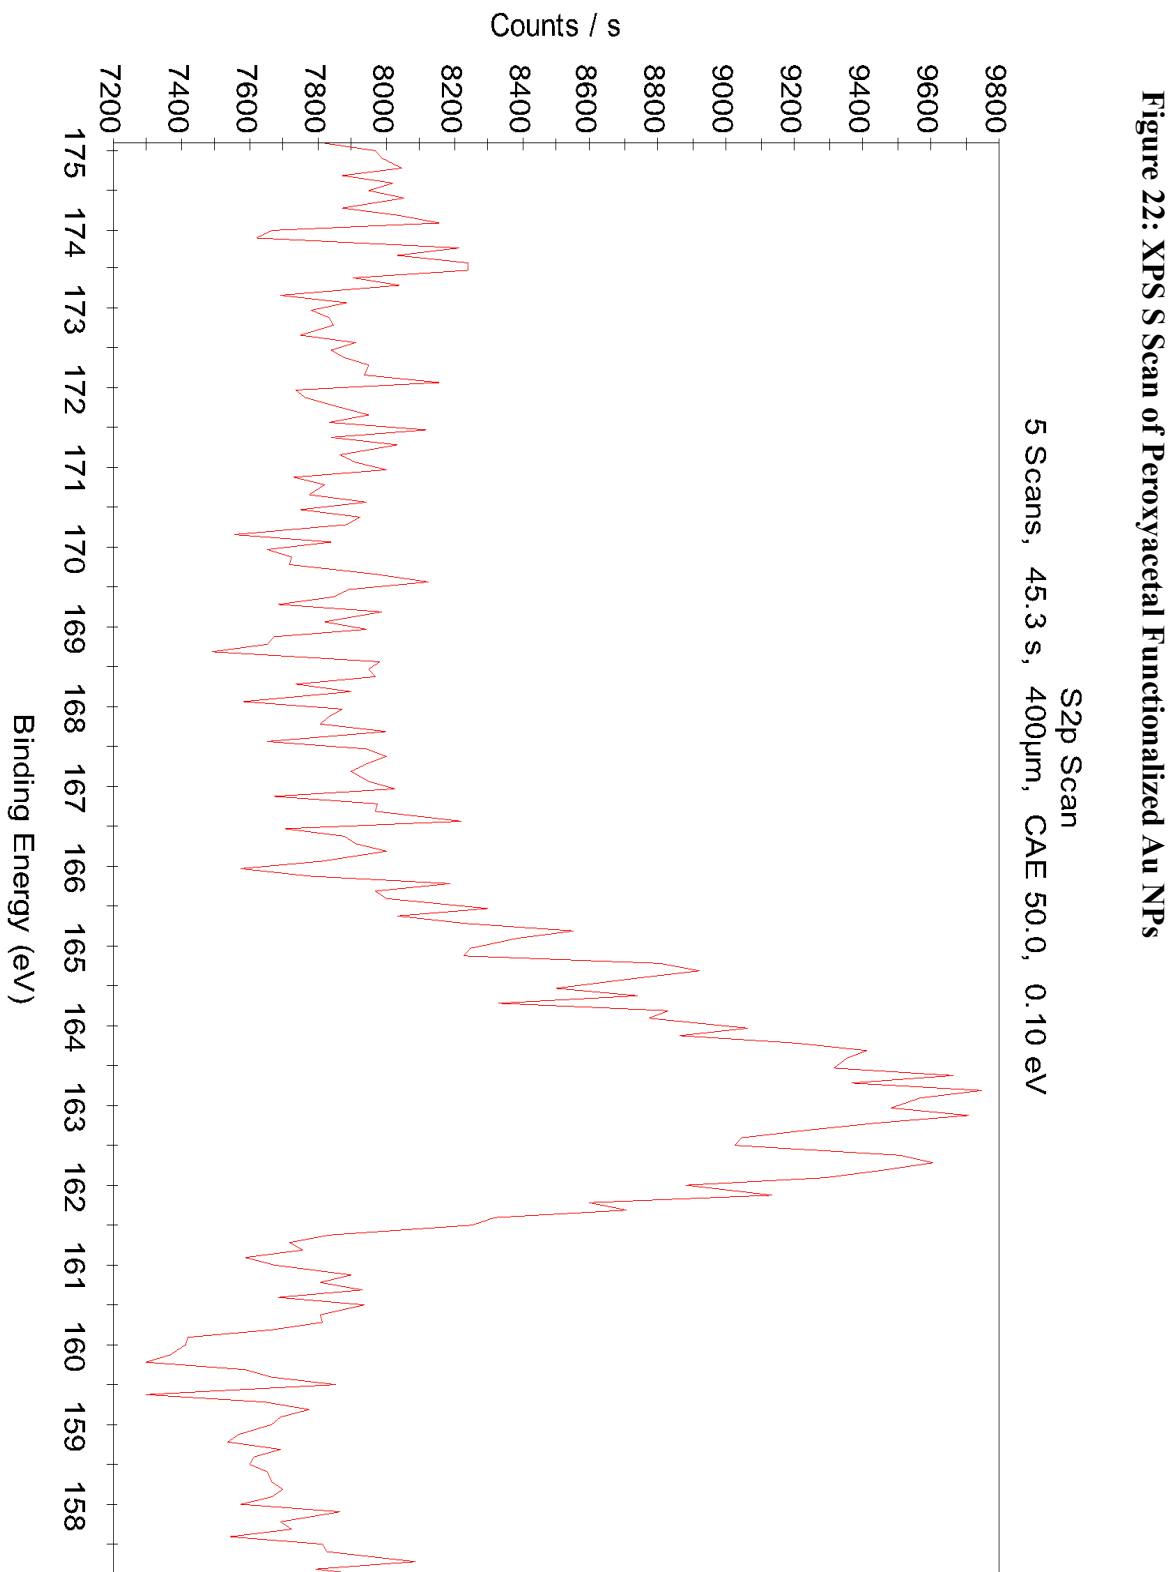

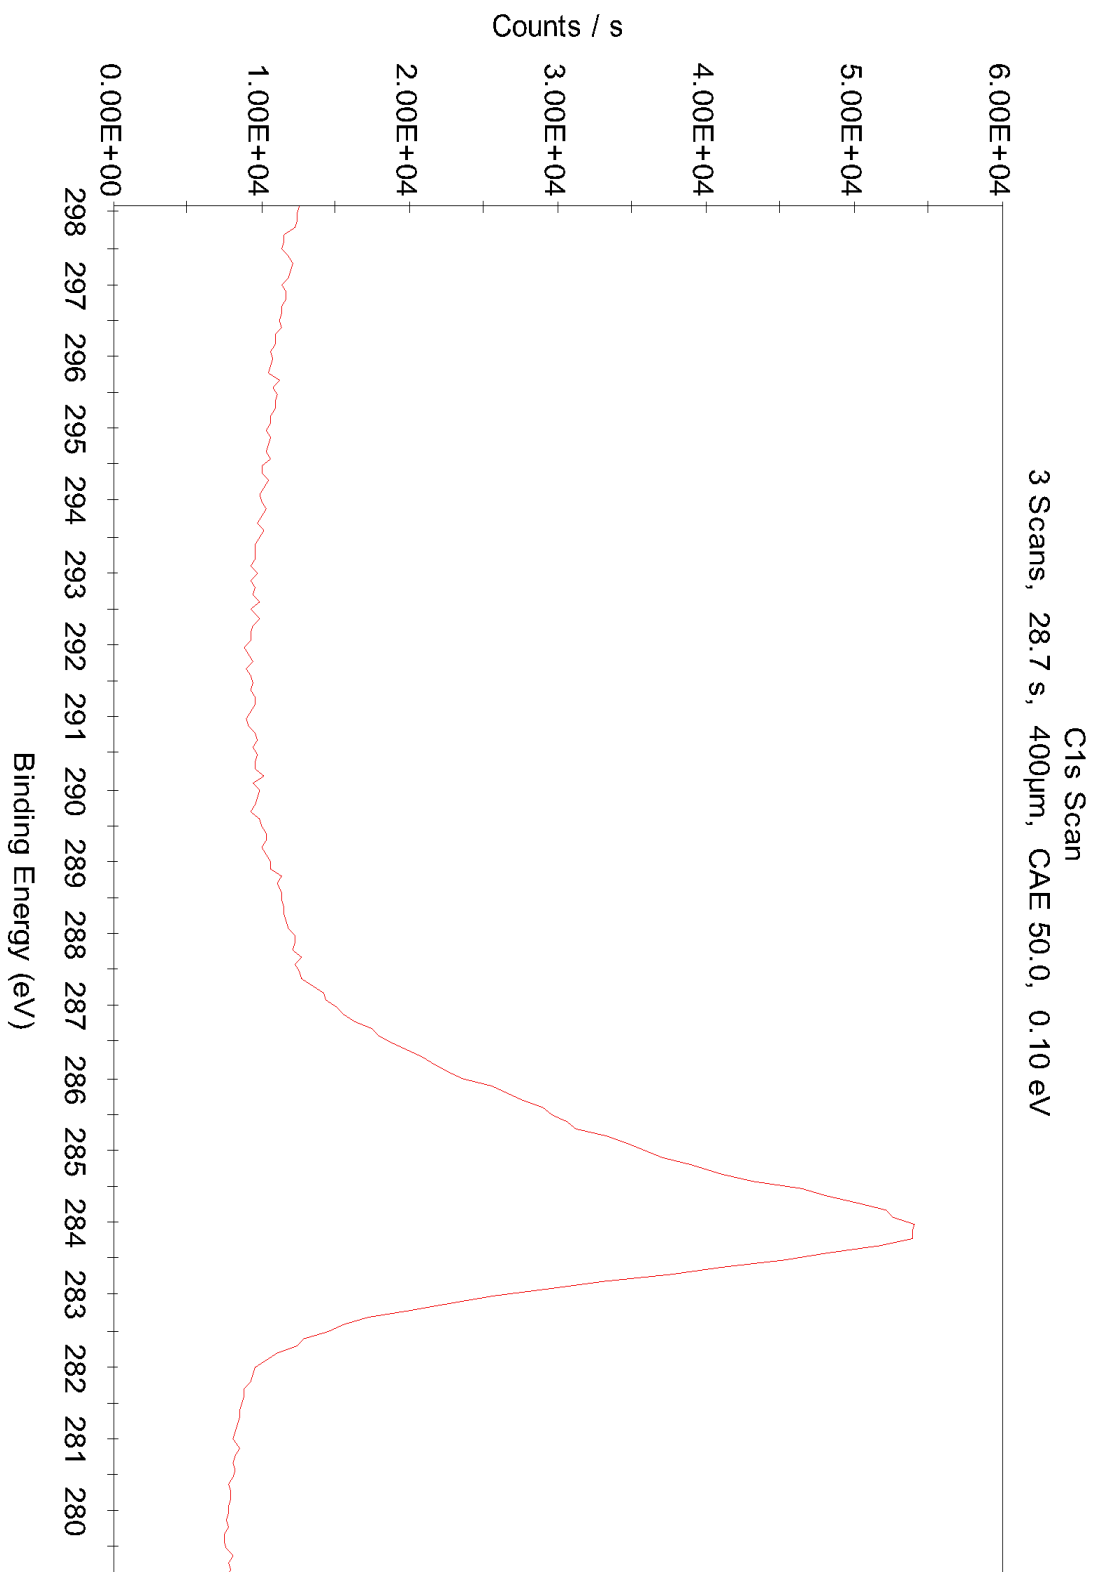

Figure 23: XPS C Scan of Peroxyacetal Functionalized Au NPs



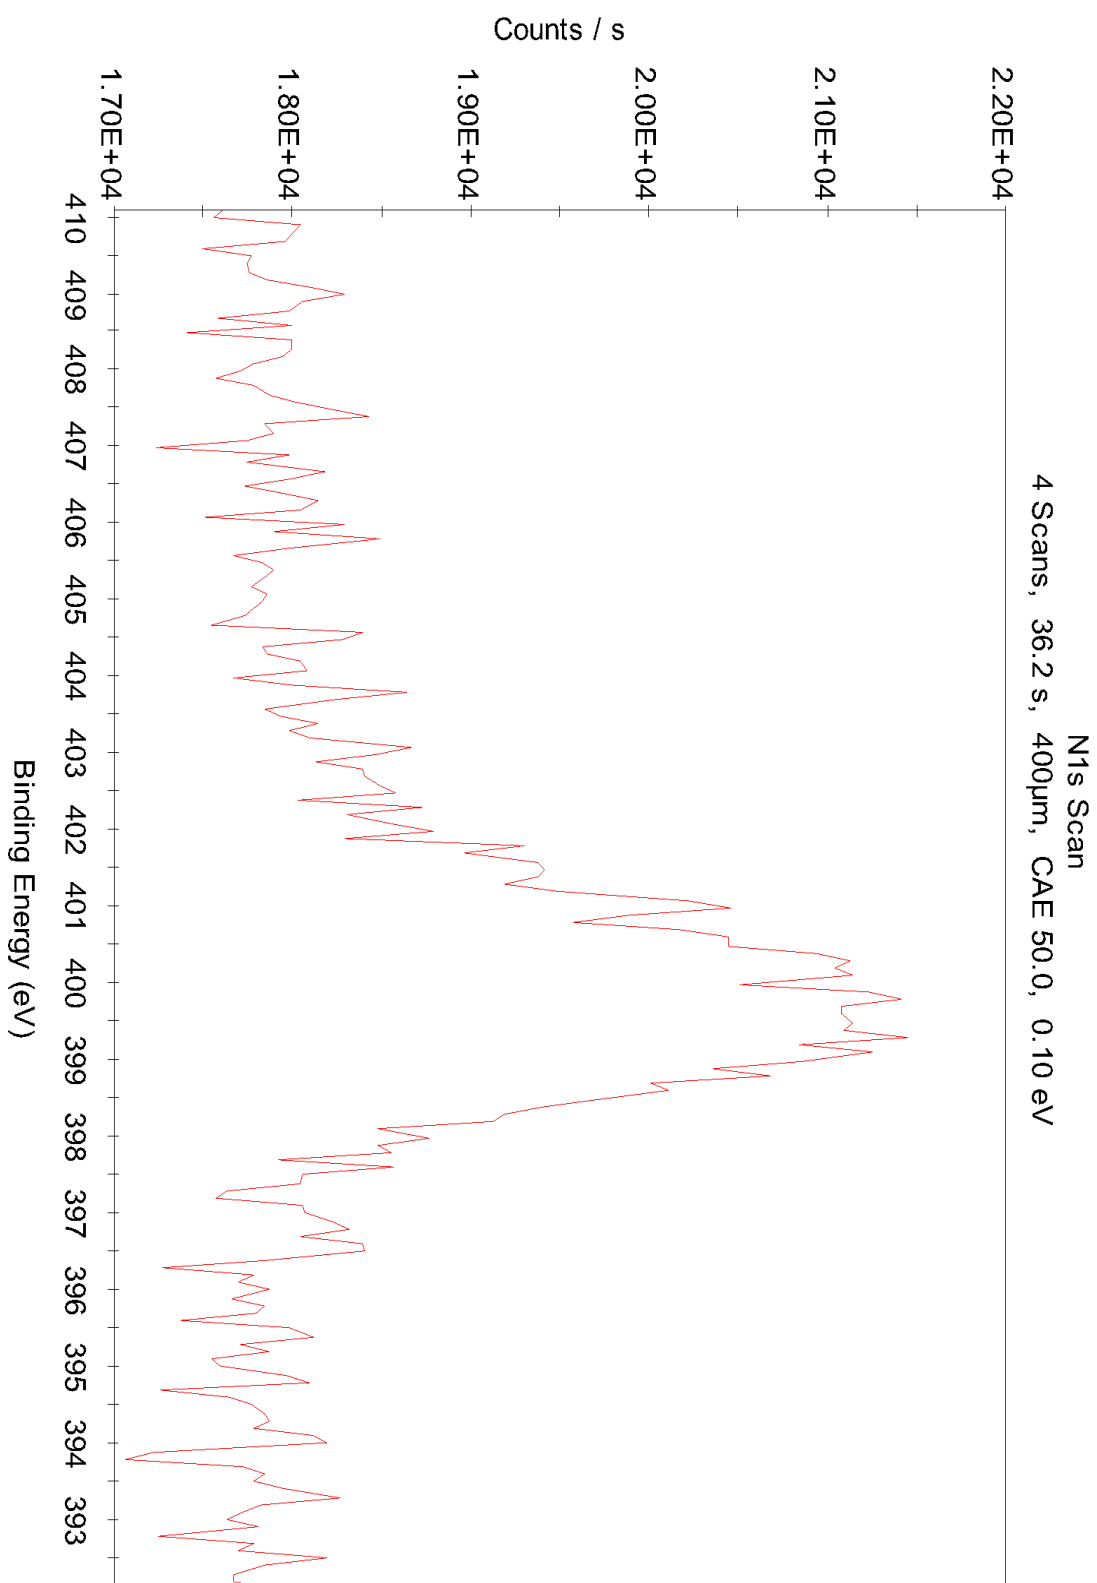

Figure 24: XPS N Scan of Peroxyacetal Functionalized Au NPs

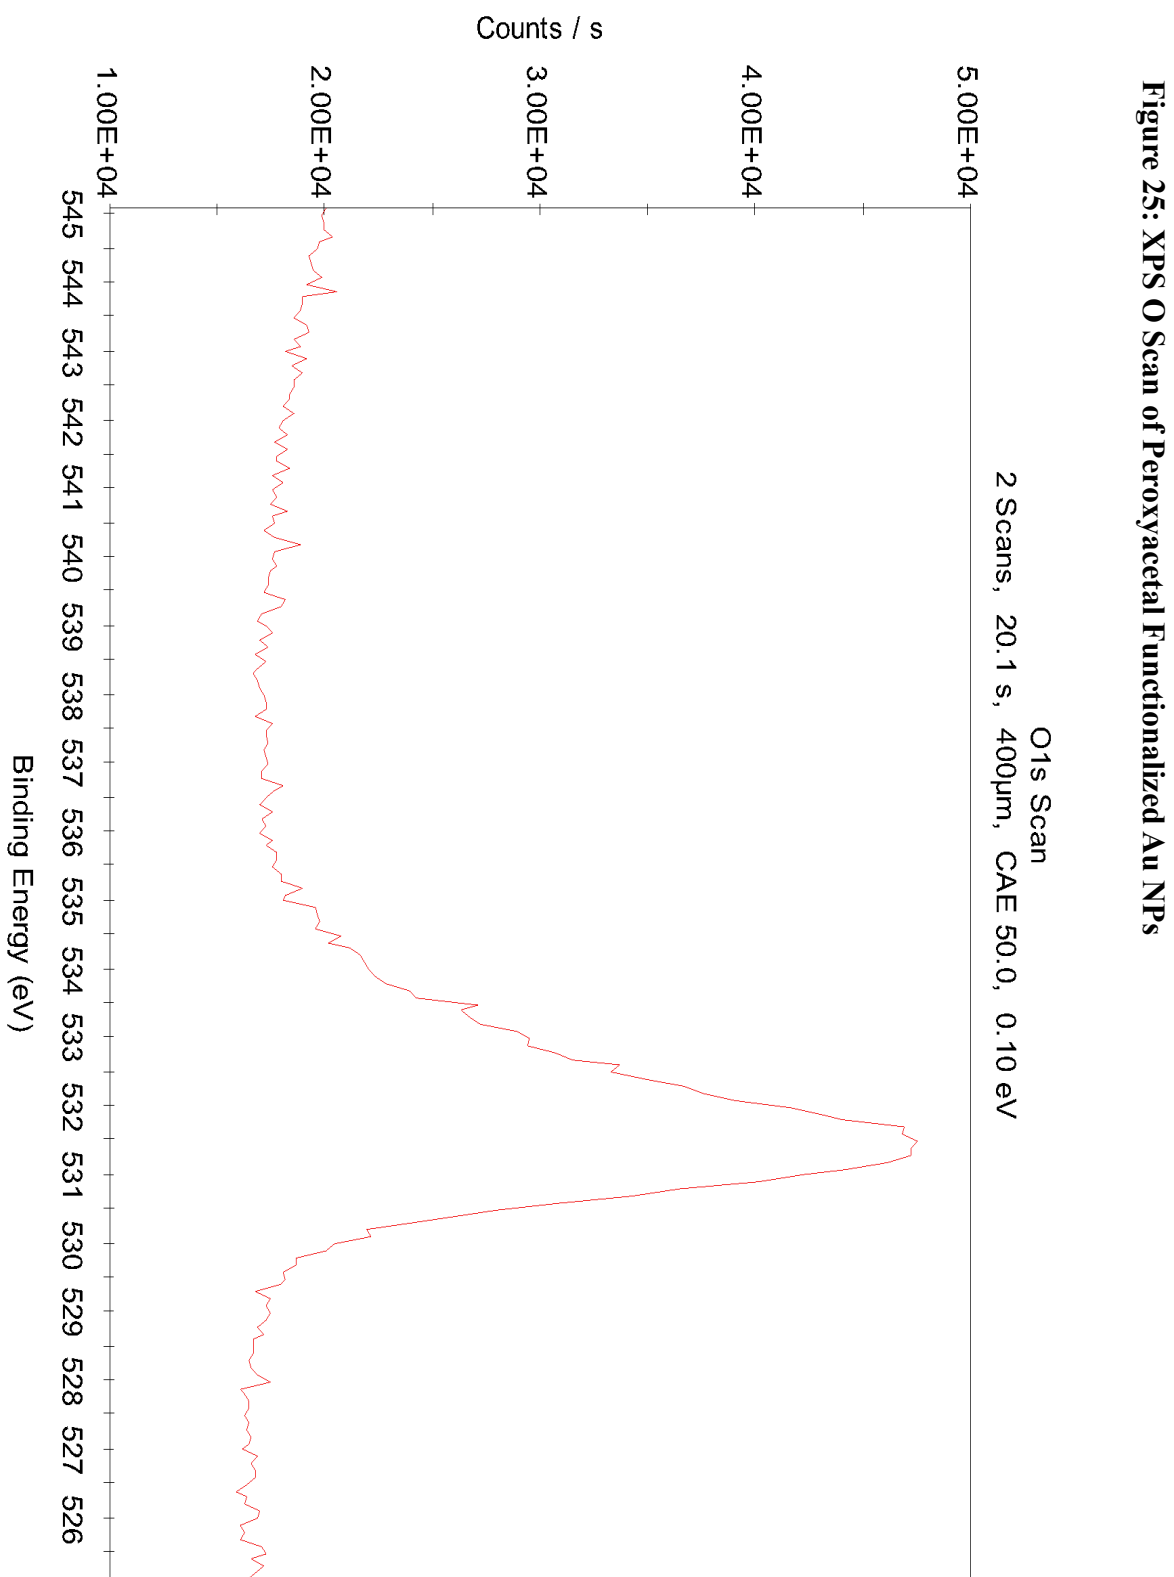

Supplement: d0ra09088c1.pdf [file d0ra09088c1.pdf]
